# Supplementary material
Source: MDPI journal article supplement (https://www.mdpi.com/1424-8247/14/9/896)
Supplement: s1 [file s1]

# Supporting Information

## ***In-silico* Prediction of Novel Inhibitors of SARS-CoV-2 Main Protease through Structure-based Virtual Screening and Molecular Dynamic Simulation**

**Sobia Ahsan Halim<sup>1,\*</sup>, Muhammad Waqas<sup>1,2</sup>, Ajmal Khan<sup>1</sup>, and  
Ahmed Al-Harrasi<sup>1,\*</sup>**

<sup>1</sup>Natural and Medical Sciences Research Center, University of Nizwa,  
Birkat Al-Mouz, Nizwa 616, Sultanate of Oman

<sup>2</sup>Department of Biotechnology and Genetic Engineering, Hazara  
University Mansehra Pakistan

\*Correspondence: sobia\_halim@unizwa.edu.om (SAH);  
aharrasi@unizwa.edu.om (A.A.-H.)

### **Contents:**

|                                                                                       |
|---------------------------------------------------------------------------------------|
| Table S1. Re-docking Results of MOE                                                   |
| Table S2. The cross-docking analysis of MOE                                           |
| Calculation of Enrichment Factor (EF) and %EF                                         |
| Table S3. Percent (%) Enrichment Factor and AUC of VS                                 |
| Figure S1. The Receiver Operating Characteristic (ROC) curve of MOE on eight proteins |
| Table S4. Docking scores and rank of selected Hits                                    |
| Figure S2. The 2D-structures of Selected Hits (1-30)                                  |
| Table S5. Physicochemical Properties of Selected Hits (1-30)                          |
| Table S6. Solubility of Selected Hits (1-30)                                          |
| Table S7. Pharmacokinetic properties of selected Hits                                 |
| Table S8. Drug likeness and Medicinal properties of selected Hits (1-30)              |
| Table S9. The ADMET results of admetSAR server                                        |
| Table S10. Interaction Analysis of Selected Hits (1-30)                               |
| Table S11. Protein-ligand complexes used in Re-docking and Cross-docking              |

**Table S1. Re-docking Results of MOE**

| S. No. | PDB IDs | Resolution (Å) | RMSD (Å) | S. No. | PDB IDs | Resolution (Å) | RMSD (Å) |
|--------|---------|----------------|----------|--------|---------|----------------|----------|
| 1      | 6M2N    | 2.2            | 0.29     | 11     | 6Y2F    | 1.95           | 2.33     |
| 2      | 6W79    | 1.46           | 0.67     | 12     | 6ZRT    | 2.1            | 2.85     |
| 3      | 5R81    | 1.95           | 0.69     | 13     | 6WNP    | 1.44           | 2.9      |
| 4      | 5R7Y    | 1.65           | 0.71     | 14     | 7JU7    | 1.6            | 2.91     |
| 5      | 5R84    | 1.83           | 0.79     | 15     | 6WTK    | 2              | 2.93     |
| 6      | 5RE4    | 1.88           | 1.08     | 16     | 5R80    | 1.93           | 2.96     |
| 7      | 5R83    | 1.58           | 1.16     | 17     | 5R82    | 1.31           | 4.24     |
| 8      | 6W63    | 2.1            | 1.17     | 18     | 6LU7    | 2.16           | 5.27     |
| 9      | 5R7Z    | 1.59           | 1.39     | 19     | 7BQY    | 1.7            | 7.42     |
| 10     | 5RE9    | 1.72           | 1.94     | 20     | 7BRR    | 1.35           | 7.45     |

**Table S2. The cross-docking analysis of MOE**

| Proteins | The ranks of Ligands in their cognate proteins |      |      |      |      |      |      |      |      |      |      |      |      |      |      |      |      |      |      |      |
|----------|------------------------------------------------|------|------|------|------|------|------|------|------|------|------|------|------|------|------|------|------|------|------|------|
|          | 6Y2F                                           | 6WTK | 6W79 | 7BQY | 6ZRT | 7JU7 | 6LU7 | 6W63 | 7BRR | 6WNP | 6M2N | 5R84 | 5R81 | 5R7Z | 5R7Y | 5RE9 | 5R80 | 5R83 | 5RE4 | 5R82 |
| 6Y2F     | 1                                              | 5    | 5    | 3    | 1    | 4    | 7    | 4    | 2    | 1    | 2    | 1    | 3    | 3    | 4    | 2    | 1    | 4    | 2    | 3    |
| 6WTK     | 4                                              | 1    | 9    | 6    | 5    | 10   | 6    | 8    | 4    | 5    | 9    | 9    | 6    | 9    | 7    | 6    | 4    | 8    | 3    | 8    |
| 6W79     | 8                                              | 6    | 1    | 5    | 6    | 6    | 5    | 5    | 8    | 4    | 9    | 5    | 14   | 7    | 5    | 1    | 8    | 5    | 9    | 5    |
| 7BQY     | 2                                              | 3    | 6    | 1    | 4    | 1    | 1    | 1    | 3    | 2    | 3    | 4    | 4    | 2    | 1    | 5    | 7    | 2    | 4    | 1    |
| 6ZRT     | 3                                              | 9    | 8    | 4    | 2    | 8    | 2    | 6    | 6    | 6    | 5    | 8    | 20   | 4    | 3    | 3    | 9    | 3    | 1    | 12   |
| 7JU7     | 9                                              | 10   | 13   | 10   | 10   | 2    | 8    | 10   | 7    | 9    | 4    | 10   | 1    | 5    | 8    | 17   | 3    | 10   | 8    | 6    |
| 6LU7     | 7                                              | 2    | 4    | 2    | 3    | 3    | 3    | 2    | 1    | 3    | 1    | 6    | 2    | 1    | 2    | 4    | 5    | 1    | 6    | 2    |
| 6W63     | 6                                              | 7    | 3    | 9    | 8    | 7    | 4    | 3    | 10   | 8    | 7    | 2    | 19   | 8    | 10   | 7    | 6    | 7    | 14   | 7    |
| 7BRR     | 5                                              | 4    | 7    | 7    | 7    | 5    | 10   | 9    | 5    | 10   | 6    | 3    | 5    | 6    | 6    | 9    | 2    | 6    | 5    | 4    |
| 6WNP     | 10                                             | 8    | 2    | 8    | 9    | 9    | 9    | 7    | 9    | 7    | 10   | 7    | 18   | 10   | 9    | 8    | 10   | 9    | 18   | 9    |
| 6M2N     | 12                                             | 11   | 12   | 14   | 12   | 13   | 11   | 12   | 14   | 14   | 11   | 13   | 10   | 12   | 17   | 10   | 11   | 13   | 7    | 11   |
| 5R84     | 11                                             | 13   | 11   | 11   | 15   | 12   | 12   | 13   | 13   | 11   | 12   | 12   | 8    | 16   | 16   | 12   | 13   | 14   | 12   | 10   |
| 5R81     | 16                                             | 14   | 18   | 17   | 16   | 17   | 13   | 15   | 17   | 16   | 16   | 18   | 13   | 14   | 15   | 15   | 18   | 17   | 15   | 18   |
| 5R7Z     | 15                                             | 15   | 15   | 15   | 14   | 14   | 18   | 16   | 16   | 15   | 15   | 14   | 9    | 13   | 12   | 11   | 14   | 11   | 10   | 16   |
| 5R7Y     | 18                                             | 18   | 16   | 18   | 17   | 15   | 15   | 18   | 18   | 17   | 17   | 17   | 12   | 18   | 14   | 13   | 17   | 16   | 17   | 14   |
| 5RE9     | 14                                             | 12   | 10   | 12   | 11   | 11   | 14   | 11   | 11   | 13   | 13   | 15   | 7    | 11   | 11   | 14   | 12   | 12   | 11   | 13   |
| 5R80     | 17                                             | 17   | 17   | 16   | 18   | 18   | 17   | 17   | 15   | 19   | 18   | 16   | 15   | 15   | 18   | 18   | 15   | 18   | 16   | 17   |
| 5R83     | 13                                             | 16   | 14   | 13   | 13   | 16   | 16   | 14   | 12   | 12   | 14   | 11   | 11   | 17   | 13   | 16   | 16   | 15   | 13   | 15   |
| 5RE4     | 20                                             | 19   | 19   | 19   | 20   | 19   | 20   | 19   | 19   | 20   | 19   | 19   | 16   | 20   | 19   | 20   | 19   | 20   | 19   | 19   |
| 5R82     | 19                                             | 20   | 20   | 20   | 19   | 20   | 19   | 20   | 20   | 18   | 20   | 20   | 17   | 19   | 20   | 19   | 20   | 19   | 20   | 20   |

*The results are shown in three-color scheme, where green represents high rank, low and moderate ranks are shown by red and yellow colours, respectively.*

### Calculation of Enrichment Factor (EF) and %EF

EF and %EF were calculated by equations 1 and 2. Success was declared when 50% of the known inhibitors were ranked in top 50 or top 100 position of screened library in each protein.

$$\text{Enrichment Factor} = ((\text{HITS sampled})/(\text{HITS Total})) / ((\text{N sampled})/(\text{N Total})) \quad \text{Eq. 1}$$

$$\% \text{ Enrichment Factor} = (\text{Enrichment Factor}) / (\text{Ideal Enrichment Factor}) \times 100 \quad \text{Eq. 2}$$

HIT sampled and HITS total corresponds to the number of active inhibitors found in top N sampled ligands of docked library, and total number of active compounds, respectively.

N sampled and N total are number of ligands in the docked database to be examined, and total number of compounds in the database, respectively.

The optimal threshold to decide the accuracy of virtual screening was set by the following criteria: if all the known inhibitors are successfully identified in top 50 or 100 compounds in screened database, then the ideal EF would be 18, and 9, respectively.

**Table S3. Percent (%) Enrichment Factor and AUC of VS**

| Library Screened | % Enrichment Factor |      |      |      |      |      |      |      |
|------------------|---------------------|------|------|------|------|------|------|------|
|                  | 6Y2F                | 6WTK | 6W79 | 7BQY | 6ZRT | 7JU7 | 6LU7 | 6W63 |
| In top 50        | 20                  | 27   | 53   | 33   | 20   | 13   | 13   | 27   |
| In top 100       | 33                  | 47   | 73   | 53   | 53   | 60   | 27   | 60   |
| In top 250       | 67                  | 73   | 100  | 73   | 80   | 73   | 87   | 67   |
| AUC-ROC          |                     |      |      |      |      |      |      |      |
|                  | 6Y2F                | 6WTK | 6W79 | 7BQY | 6ZRT | 7JU7 | 6LU7 | 6W63 |
|                  | 0.80                | 0.80 | 0.90 | 0.83 | 0.84 | 0.79 | 0.81 | 0.83 |

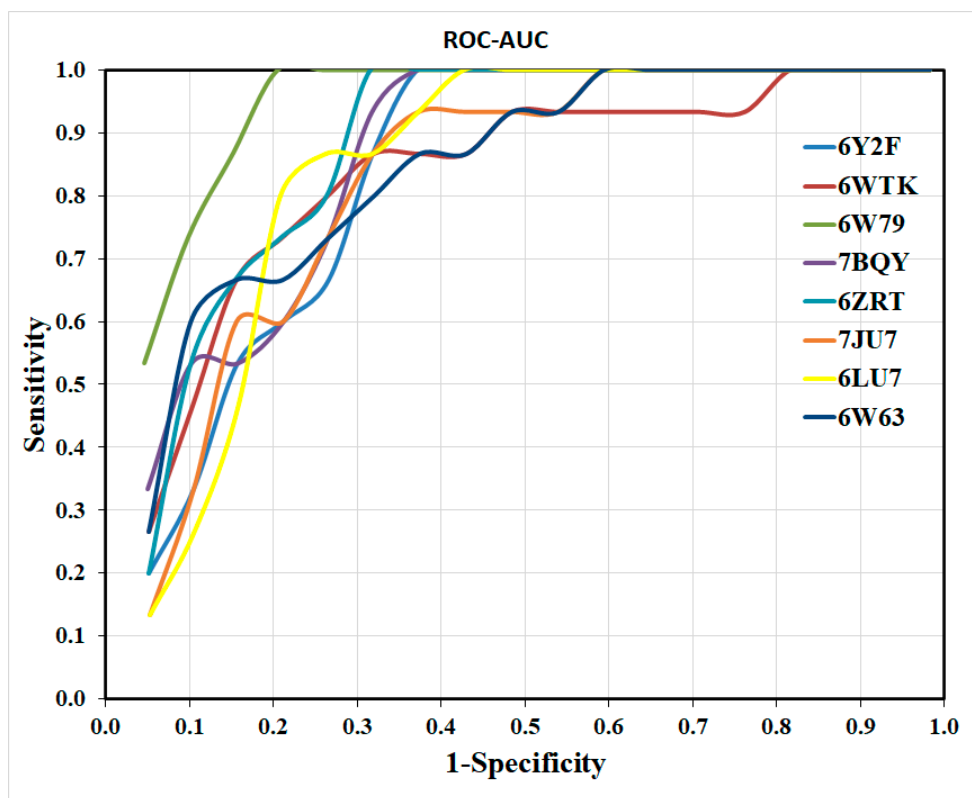

Figure S1. The Receiver Operating Characteristic (ROC) curve of MOE on eight proteins

Table S4. Docking scores and rank of selected Hits

| Compounds | Compound Codes | 6W63 |        | 6W79 |        | 6WTK |        | 6Y2F |        | 6LU7 |         | 7JU7 |         | 7BQY |         | 6ZRT |        |
|-----------|----------------|------|--------|------|--------|------|--------|------|--------|------|---------|------|---------|------|---------|------|--------|
|           |                | Rank | Score   | Rank | score   | Rank | Score   | Rank | Score  |
| 1         | JAOETH35       | 19   | -13.46 | 18   | -13.94 | 2    | -16.95 | 6    | -15.22 | 1    | -16.68  | 67   | -12.6   | 4    | -15.3   | 8    | -14.15 |
| 2         | QTEM-10        | 1    | -16.28 | 1    | -16.08 | 6    | -14.98 | 2    | -15.86 | 3    | -16.2   | 1    | -15.55  | 9    | -14.76  | 1    | -15.34 |
| 3         | JAOMET4        | 10   | -13.96 | 14   | -14.31 | 7    | -14.76 | 4    | -15.47 | 4    | -15.93  | 4    | -15.08  | 6    | -15.09  | 2    | -15.1  |
| 4         | QTME-16        | 3    | -15.03 | 6    | -14.69 | 1    | -17.52 | 5    | -15.35 | 6    | -15.15  | 5    | -14.71  | 44   | -13.16  | 11   | -14.06 |
| 5         | JAOETH-90      | 13   | -13.79 | 8    | -14.48 | 4    | -15.31 | 9    | -14.7  | 7    | -15.11  | 55   | -12.74  | 7    | -14.97  | 13   | -13.82 |
| 6         | SBEH-40        | 7    | -14.55 | 13   | -14.36 | 32   | -13.55 | 36   | -13.4  | 8    | -15.04  | 10   | -14.04  | 21   | -13.96  | 37   | -13.01 |
| 7         | QTME-12        | 26   | -13.31 | 21   | -13.59 | 41   | -13.27 | 25   | -13.69 | 10   | -14.8   | 16   | -13.64  | 23   | -13.95  | 40   | -13    |
| 8         | SBME-25        | 5    | -14.85 | 10   | -14.44 | 29   | -13.65 | 8    | -14.73 | 11   | -14.75  | 2    | -15.299 | 3    | -15.9   | 5    | -14.48 |
| 9         | SBEH-60        | 4    | -14.85 | 7    | -14.61 | 11   | -14.37 | 10   | -14.61 | 15   | -14.63  | 15   | -13.74  | 2    | -16.02  | 50   | -12.87 |
| 10        | QTME-14        | 11   | -13.96 | 3    | -15.75 | 10   | -14.41 | 3    | -15.73 | 19   | -14.26  | 60   | -12.71  | 31   | -13.48  | 23   | -13.38 |
| 11        | SBME-P5        | 68   | -12.19 | 26   | -13.43 | 9    | -14.67 | 30   | 13.56  | 45   | -13.14  | 3    | -15.11  | 70   | -12.74  | 14   | -13.65 |
| 12        | SB-1           | 91   | -12.02 | 4    | -15.73 | 68   | -12.74 | 37   | -13.38 | 72   | -12.75  | 99   | -12.3   | 43   | -13.17  | 15   | -13.58 |
| 13        | R-NPG-14       | 16   | -13.64 | 67   | -12.55 | 25   | -13.76 | 49   | -13.19 | 88   | -12.59  | 61   | -12.71  | 20   | -13.96  | 36   | -13.03 |
| 14        | QTH-90         | 6    | -14.8  | 5    | -15.11 | 5    | -15.23 | 1    | -16.36 | 13   | -14.7   | 161  | -11.97  | 1    | -16.11  | 22   | -13.41 |
| 15        | SBME-P3        | 99   | -11.89 | 83   | -12.37 | 40   | -13.27 | 148  | -12.19 | 24   | -13.89  | 26   | -13.28  | 73   | -12.66  | 44   | -12.94 |
| 16        | 5.cdx          | 70   | -12.18 | 25   | -13.48 | 79   | -12.63 | 141  | -12.23 | 44   | -13.15  | 18   | -13.55  | 25   | -13.71  | 51   | -12.86 |
| 17        | JCDACH90       | 38   | -12.79 | 72   | -12.51 | 36   | -13.43 | 11   | -14.54 | 47   | -13.11  | 188  | -11.78  | 19   | -14.06  | 19   | -13.47 |
| 18        | R-NPG-3        | 36   | -12.8  | 37   | -13.05 | 35   | -13.49 | 177  | -12.07 | 96   | -12.53  | 90   | -12.36  | 14   | -14.15  | 10   | -14.14 |
| 19        | N-D-12A        | 117  | -11.75 | 122  | -12.04 | 18   | -14.09 | 99   | -12.54 | 14   | -14.64  | 102  | -12.27  | 17   | -14.13  | 6    | -14.23 |
| 20        | R-NPG-21       | 25   | -13.38 | 34   | -13.15 | 117  | -12.32 | 105  | -12.52 | 21   | -14.16  | 7    | -14.48  | 185  | -11.899 | 34   | -13.05 |
| 21        | S5-5           | 59   | -12.34 | 65   | -12.56 | 8    | -14.71 | 14   | -14.2  | 42   | -13.22  | 22   | -13.37  | 181  | -11.93  | 172  | -11.78 |
| 22        | AM-12          | 33   | -12.99 | 102  | -12.2  | 26   | -13.71 | 156  | -12.14 | 55   | -12.99  | 43   | -12.92  | 127  | -12.23  | 179  | -11.74 |
| 23        | N-D-12B        | 60   | -12.33 | 129  | -11.98 | 22   | -13.88 | 12   | -14.38 | 63   | -12.897 | 194  | -11.7   | 109  | -12.35  | 203  | -11.65 |
| 24        | F-14           | 107  | -11.81 | 189  | -11.64 | 143  | -12.16 | 80   | -12.67 | 64   | -12.84  | 12   | -14.03  | 176  | -11.95  | 83   | -12.37 |
| 25        | 6D             | 200  | -11.3  | 48   | -12.76 | 184  | -11.91 | 194  | -11.92 | 70   | -12.796 | 58   | -12.72  | 41   | -13.188 | 210  | -11.63 |
| 26        | 6JA            | 186  | -11.37 | 166  | -11.76 | 72   | -12.69 | 50   | -13.17 | 36   | -13.39  | 109  | -12.22  | 63   | -12.779 | 66   | -12.56 |
| 27        | 6FA            | 24   | -13.38 | 143  | -11.89 | 114  | -12.33 | 24   | -13.72 | 99   | -12.48  | 88   | -12.36  | 54   | -13.01  | 108  | -12.16 |
| 28        | RXN-24         | 47   | -12.64 | 78   | -12.46 | 94   | -12.48 | 95   | -12.59 | 77   | -12.698 | 247  | -11.46  | 30   | -13.53  | 67   | -12.54 |
| 29        | SBME-P6        | 54   | -12.43 | 87   | -12.34 | 12   | -14.32 | 66   | -12.86 | 22   | -13.95  | 248  | -11.28  | 36   | -13.34  | 4    | -14.57 |
| 30        | 6MA            | 21   | -13.46 | 40   | -12.95 | 244  | -11.7  | 53   | -13.14 | 83   | -12.64  | 8    | -14.45  | 27   | -13.69  | 55   | -12.79 |

The rank and score of compounds at top-100 position are highlighted in green colour, while compounds from top-100 to top-200 and from top-200 to top-250 position are highlighted in yellow and orange colours, respectively.

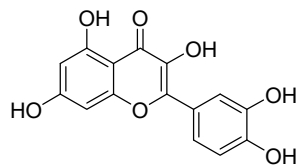

(1)  
2-(3,4-dihydroxyphenyl)-3,5,7-trihydroxy-4H-chromen-4-one

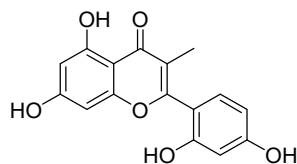

(5)  
2-(2,4-dihydroxyphenyl)-5,7-dihydroxy-3-methyl-4H-chromen-4-one

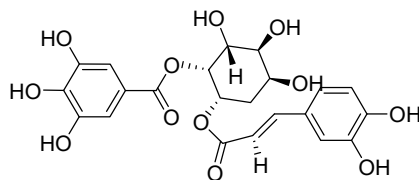

(2)  
1R,2R,3S,4S,6S)-6-((E)-3-(3,4-dihydroxyphenyl)acryloyloxy)-2,3,4-trihydroxycyclohexyl 3,4,5-trihydroxybenzoate

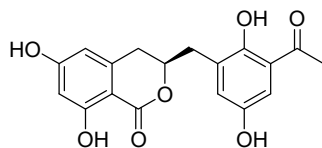

(6)  
(S)-3-(3-acetyl-2,5-dihydroxybenzyl)-6,8-dihydroxy-3,4-dihydroisochromen-1-one

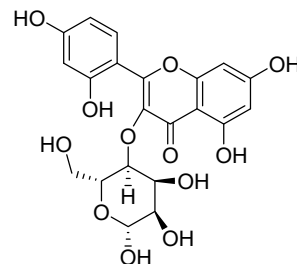

(3)  
2-(2,4-dihydroxyphenyl)-5,7-dihydroxy-3-(((2R,3S,4S,5R,6R)-4,5,6-trihydroxy-2-(hydroxymethyl)-tetrahydro-2H-pyran-3-yloxy)-4H-chromen-4-one

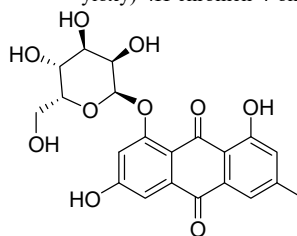

(7)  
1,6-dihydroxy-3-methyl-8-(((2R,3R,4R,5R,6R)-3,4,5-trihydroxy-6-(hydroxymethyl)-tetrahydro-2H-pyran-2-yloxy)anthracene-9,10-dione

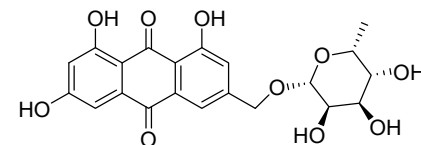

(4)  
1,3,8-trihydroxy-6-(((2R,3R,4R,5R,6R)-3,4,5-trihydroxy-6-methyl-tetrahydro-2H-pyran-2-yloxy)methyl)anthracene-9,10-dione

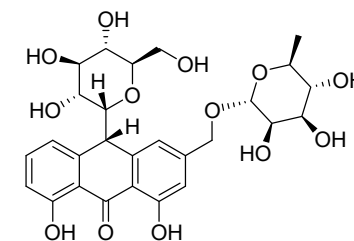

(8)  
(S)-4,5-dihydroxy-9-(((2R,3R,4R,5S,6R)-3,4,5-trihydroxy-6-(hydroxymethyl)-tetrahydro-2H-pyran-2-yl)-2-(((2R,3R,4R,5R,6S)-3,4,5-trihydroxy-6-methyl-tetrahydro-2H-pyran-2-yloxy)methyl)anthracen-10(9H)-one

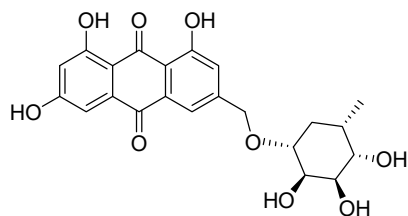

**(9)**  
1,3,8-trihydroxy-6-(((1R,2R,3R,4S,5S)-2,3,4-methylcyclohexyloxy)methyl)anthracene-9,10-dione

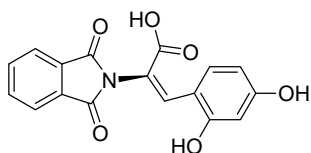

**(13)**  
(E)-3-(2,4-dihydroxyphenyl)-2-(1,3-dioxoisindolin-2-yl)acrylic acid

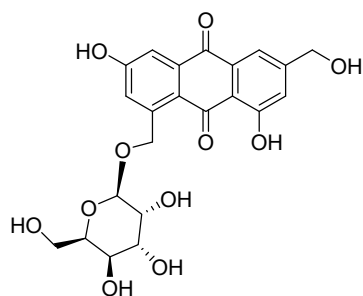

**(10)**  
1,6-dihydroxy-3-(hydroxymethyl)-8-(((2R,3R,4R,5R,6R)-3,4,5-trihydroxy-6-(hydroxymethyl)-tetrahydro-2H-pyran-2-yloxy)methyl)anthracene-9,10-dione

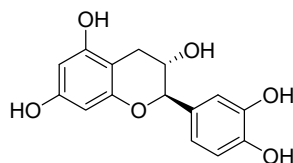

**(14)**  
(2R,3S)-2-(3,4-dihydroxyphenyl)-3,4-dihydro-2H-chromene-3,5,7-triol

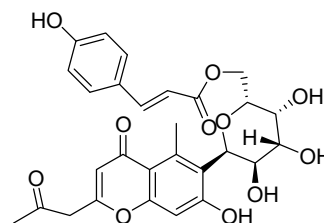

**(11)**  
(E)-((2R,3R,4R,5R,6R)-3,4,5-trihydroxy-6-(7-hydroxy-5-methyl-4-oxo-2-(2-oxopropyl)-4H-chromen-6-yl)-tetrahydro-2H-pyran-2-yl)methyl 3-(4-hydroxyphenyl)acrylate

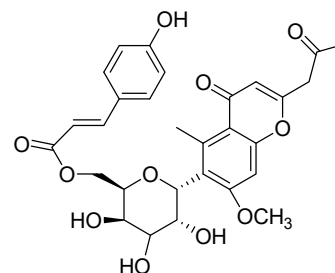

**(15)**  
(E)-((2R,3R,5R,6R)-3,4,5-trihydroxy-6-(7-methoxy-5-methyl-4-oxo-2-(2-oxopropyl)-4H-chromen-6-yl)-tetrahydro-2H-pyran-2-yl)methyl 3-(4-hydroxyphenyl)acrylate

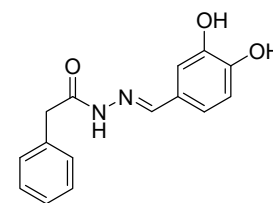

**(12)**  
(E)-N'-(3,4-dihydroxybenzylidene)-2-phenylacetohydrazide

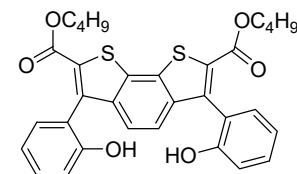

**(16)**  
4,11-dibutyl 5,10-bis(2-hydroxyphenyl)-3,12-dithiatricyclo[7.3.0.0.2,6]dodeca-1,4,6,8,10-pentaene-4,11-dicarboxylate

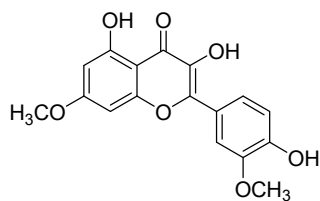

(17)  
3,5-dihydroxy-2-(4-hydroxy-3-methoxyphenyl)-7-methoxy-4H-chromen-4-one

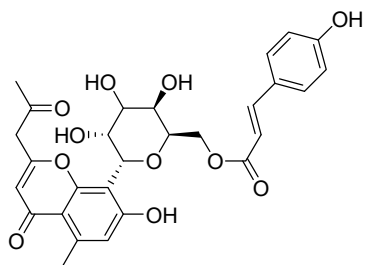

(21)  
(E)-((2R,3R,5R,6R)-3,4,5-trihydroxy-6-(7-hydroxy-5-methyl-4-oxo-2-(2-oxopropyl)-4H-chromen-8-yl)-tetrahydro-2H-pyran-2-yl)methyl 3-(4-hydroxyphenyl)acrylate

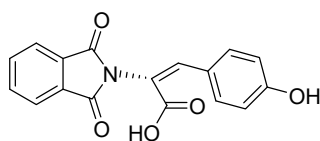

(18)  
(E)-2-(1,3-dioxoisindolin-2-yl)-3-(4-hydroxyphenyl)acrylic acid

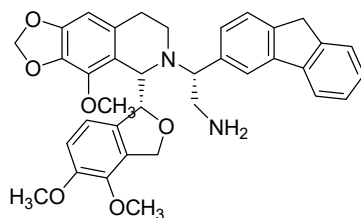

(22)  
(R)-2-((R)-5-((R)-4,5-dimethoxy-1,3-dihydroisobenzofuran-1-yl)-4-methoxy-7,8-dihydro-[1,3]dioxolo[4,5-g]isoquinolin-6(5H)-yl)-2-(9H-fluoren-3-yl)ethanamine

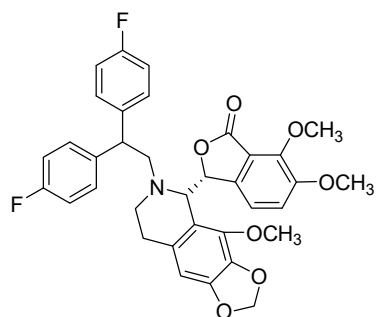

(19)  
(R)-3-((R)-6-(2,2-bis(4-fluorophenyl)ethyl)-4-methoxy-5,6,7,8-tetrahydro-[1,3]dioxolo[4,5-g]isoquinolin-5-yl)-6,7-dimethoxyisobenzofuran-1(3H)-one

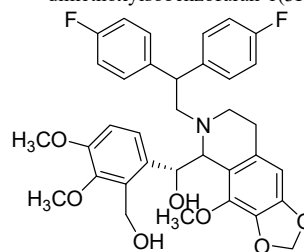

(23)  
(R)-{6-[2,2-bis(4-fluorophenyl)ethyl]-4-methoxy-2H,5H,6H,7H,8H-[1,3]dioxolo[4,5-g]isoquinolin-5-yl}[2-(hydroxymethyl)-3,4-dimethoxyphenyl]methanol

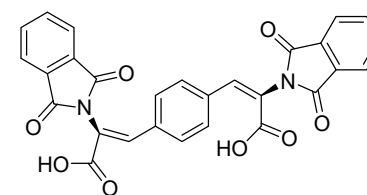

(20)  
3-{4-[2-carboxy-2-(1,3-dioxo-2,3-dihydro-1H-isoindol-2-yl)eth-1-en-1-yl]phenyl}-2-(1,3-dioxo-2,3-dihydro-1H-isoindol-2-yl)prop-2-enoic acid

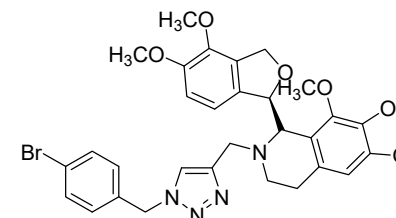

(24)  
(S)-6-((1-(4-bromobenzyl)-1H-1,2,3-triazol-4-yl)methyl)-4-methoxy-5-((R)-5-methoxy-4-methyl-1,3-dihydroisobenzofuran-1-yl)-5,6,7,8-tetrahydro-[1,3]dioxolo[4,5-g]isoquinoline



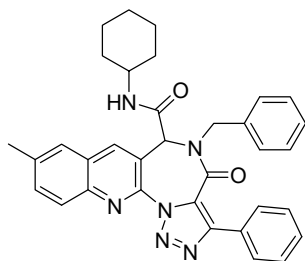

**(25)**  
8-benzyl-N-cyclohexyl-14-methyl-7-oxo-5-phenyl-2,3,4,8,18-pentaazatetracyclo[8.8.0.0<sup>2,6</sup>.0<sup>12,17</sup>]octadeca-1(10),3,5,11,13,15,17-heptaene-9-carboxamide

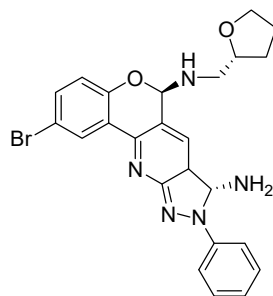

**(26)**  
(9R,13R)-4-bromo-N9-{(2R)-oxolan-2-yl}methyl}-14-phenyl-8-oxa-14,15,17-triazatetracyclo[8.7.0.0<sup>2,7</sup>.0<sup>12,16</sup>]heptadeca-1(17),2,4,6,10,15-hexaene-9,13-diamine

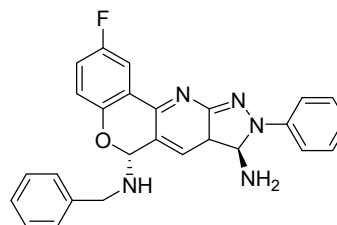

**(27)**  
(9R,13R)-N9-benzyl-4-fluoro-14-phenyl-8-oxa-14,15,17-triazatetracyclo[8.7.0.0<sup>2,7</sup>.0<sup>12,16</sup>]heptadeca-1(17),2(7),3,5,10,15-hexaene-9,13-diamine

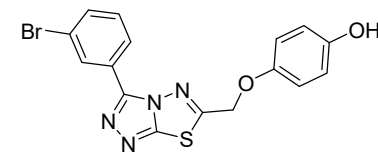

**(28)**  
4-((3-(3-bromophenyl)-[1,2,4]triazolo[3,4-b][1,3,4]thiadiazol-6-yl)methoxy)phenol

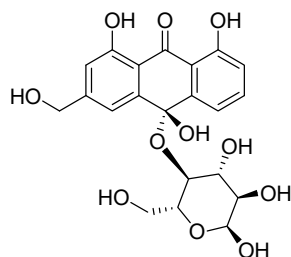

**(29)**  
(S)-4,5,9-trihydroxy-2-(hydroxymethyl)-9-((2R,3S,4R,5R,6S)-4,5,6-trihydroxy-2-(hydroxymethyl)-tetrahydro-2H-pyran-3-yloxy)anthracen-10(9H)-one

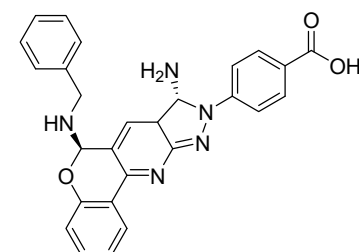

**(30)**  
4-[(9R,13R)-13-amino-9-(benzylamino)-8-oxa-14,15,17-triazatetracyclo[8.7.0.0<sup>2,7</sup>.0<sup>12,16</sup>]]benzoic acid

**Figure S2. The chemical-structures of Selected Hits (1-30)**

**Table S5. Physicochemical Properties of Selected Hits (1-30)**

| Compound | Physicochemical Properties |            |     |      |               |     |     |     |        |           |
|----------|----------------------------|------------|-----|------|---------------|-----|-----|-----|--------|-----------|
|          | Formula                    | MW (g.mol) | NHA | NAHA | Fraction Csp3 | NRB | HBA | HBD | MR     | TPSA (Å²) |
| 1        | C15H10O7                   | 302.24     | 22  | 16   | 0.00          | 1   | 7   | 5   | 78.04  | 131.36 s  |
| 2        | C22H22O13                  | 494.40     | 35  | 12   | 0.27          | 8   | 13  | 8   | 114.84 | 223.67    |
| 3        | C21H20O12                  | 464.38     | 33  | 16   | 0.29          | 4   | 12  | 8   | 110.16 | 210.51    |
| 4        | C21H20O10                  | 432.38     | 31  | 12   | 0.33          | 3   | 10  | 6   | 103.17 | 173.98    |
| 5        | C21H20O11                  | 448.38     | 32  | 16   | 0.29          | 3   | 11  | 7   | 109.00 | 190.28    |
| 6        | C18H16O7                   | 344.32     | 25  | 12   | 0.22          | 3   | 7   | 4   | 88.15  | 124.29    |
| 7        | C21H20O10                  | 432.38     | 31  | 12   | 0.33          | 3   | 10  | 6   | 102.91 | 173.98    |
| 8        | C27H32O13                  | 564.54     | 40  | 12   | 0.52          | 5   | 13  | 9   | 133.18 | 226.83    |
| 9        | C21H20O10                  | 432.38     | 31  | 12   | 0.33          | 3   | 10  | 6   | 103.17 | 173.98    |
| 10       | C22H22O11                  | 462.40     | 33  | 12   | 0.36          | 5   | 11  | 7   | 108.43 | 194.21    |
| 11       | C28H28O11                  | 540.52     | 39  | 16   | 0.32          | 8   | 11  | 5   | 138.24 | 183.96    |
| 12       | C15H13BrN2O3               | 349.18     | 21  | 12   | 0.07          | 5   | 4   | 3   | 83.94  | 81.92     |
| 13       | C17H11NO6                  | 325.27     | 24  | 12   | 0.00          | 3   | 6   | 3   | 86.96  | 115.14    |
| 14       | C15H14O6                   | 290.27     | 21  | 12   | 0.20          | 1   | 6   | 5   | 74.33  | 110.38    |
| 15       | C29H30O11                  | 554.54     | 40  | 16   | 0.34          | 9   | 11  | 4   | 142.71 | 172.96    |
| 16       | C16H23NO3                  | 313.39     | 23  | 10   | 0.32          | 6   | 3   | 2   | 94.70  | 62.32     |
| 17       | C17H14O7                   | 330.29     | 24  | 16   | 0.12          | 3   | 7   | 3   | 86.97  | 109.36    |
| 18       | C17H11NO5                  | 309.27     | 23  | 12   | 0.00          | 3   | 5   | 2   | 84.93  | 94.91     |
| 19       | C35H31F2NO7                | 615.62     | 45  | 24   | 0.29          | 8   | 10  | 0   | 163.57 | 75.69     |
| 20       | C28H16N2O8                 | 508.44     | 38  | 18   | 0.00          | 6   | 8   | 2   | 139.38 | 149.36    |
| 21       | C28H28O11                  | 540.52     | 39  | 16   | 0.32          | 8   | 11  | 5   | 138.24 | 183.96    |
| 22       | C36H36N2O6                 | 592.68     | 44  | 24   | 0.33          | 7   | 8   | 1   | 169.90 | 84.64     |
| 23       | C35H35F2NO7                | 619.65     | 45  | 24   | 0.31          | 10  | 10  | 2   | 166.50 | 89.85     |
| 24       | C31H31BrN4O6               | 635.51     | 42  | 23   | 0.35          | 8   | 9   | 0   | 160.97 | 89.33     |
| 25       | C34H32N6O2                 | 556.66     | 42  | 27   | 0.26          | 6   | 5   | 1   | 165.94 | 93.01     |
| 26       | C24H24BrN5O2               | 494.38     | 32  | 12   | 0.33          | 4   | 6   | 2   | 137.21 | 84.84     |
| 27       | C26H22FN5O                 | 439.48     | 33  | 18   | 0.15          | 4   | 6   | 2   | 135.76 | 75.24     |
| 28       | C16H11BrN4O2S              | 403.25     | 24  | 20   | 0.06          | 4   | 5   | 1   | 94.80  | 100.78    |
| 29       | C21H22O11                  | 450.39     | 32  | 12   | 0.38          | 4   | 11  | 8   | 104.09 | 197.37    |
| 30       | C27H23N5O3                 | 465.50     | 35  | 18   | 0.15          | 5   | 7   | 3   | 142.76 | 112.54    |

MW = molecular weight, NHA = number of heavy atoms, NAHA = number of aromatic heavy atoms, NRB = number of rotatable bonds, HBA = number of hydrogen bond acceptors, HBD = number of hydrogen bond donors, MR = molar refractivity, TPSA = topological polar surface area

**Table S6. Solubility of Selected Hits (1-30)**

| Compounds | Lipophilicity         | Water Solubility |                                 |         |
|-----------|-----------------------|------------------|---------------------------------|---------|
|           | Log $P_{o/w}$ (iLOGP) | Log $S$ (ESOL)   | S                               | Class   |
| 1         | 1.63                  | -3.16            | 2.11e-01 mg/ml ; 6.98e-04 mol/l | Soluble |
| 2         | 2.29                  | -2.96            | 5.36e-01 mg/ml ; 1.08e-03 mol/l | Soluble |
| 3         | 1.09                  | -2.30            | 2.34e+00 mg/ml ; 5.04e-03 mol/l | Soluble |
| 4         | 2.18                  | -2.84            | 6.22e-01 mg/ml ; 1.44e-03 mol/l | Soluble |
| 5         | 1.74                  | -2.94            | 5.11e-01 mg/ml ; 1.14e-03 mol/l | Soluble |
| 6         | 2.14                  | -4.15            | 2.45e-02 mg/ml ; 7.11e-05 mol/l | MS      |
| 7         | 1.86                  | -3.18            | 2.84e-01 mg/ml ; 6.57e-04 mol/l | Soluble |
| 8         | 0.25                  | -2.46            | 1.94e+00 mg/ml ; 3.44e-03 mol/l | Soluble |
| 9         | 2.18                  | -2.84            | 6.22e-01 mg/ml ; 1.44e-03 mol/l | Soluble |
| 10        | 1.39                  | -2.23            | 2.72e+00 mg/ml ; 5.89e-03 mol/l | Soluble |
| 11        | 2.17                  | -3.26            | 2.95e-01 mg/ml ; 5.46e-04 mol/l | Soluble |
| 12        | 2.24                  | -3.83            | 5.16e-02 mg/ml ; 1.48e-04 mol/l | Soluble |
| 13        | 1.30                  | -3.23            | 1.91e-01 mg/ml ; 5.86e-04 mol/l | Soluble |
| 14        | 1.33                  | -2.22            | 1.74e+00 mg/ml ; 5.98e-03 mol/l | Soluble |
| 15        | 2.77                  | -3.48            | 1.82e-01 mg/ml ; 3.28e-04 mol/l | Soluble |
| 16        | 3.14                  | -3.86            | 4.36e-02 mg/ml ; 1.39e-04 mol/l | MS      |
| 17        | 2.81                  | -3.56            | 9.04e-02 mg/ml ; 2.74e-04 mol/l | MS      |
| 18        | 1.40                  | -3.37            | 1.32e-01 mg/ml ; 4.27e-04 mol/l | Soluble |
| 19        | 4.74                  | -7.51            | 1.92e-05 mg/ml ; 3.13e-08 mol/l | PS      |
| 20        | 2.03                  | -5.04            | 4.65e-03 mg/ml ; 9.15e-06 mol/l | PS      |
| 21        | 2.77                  | -3.26            | 2.95e-01 mg/ml ; 5.46e-04 mol/l | soluble |
| 22        | 4.67                  | -6.43            | 2.20e-04 mg/ml ; 3.72e-07 mol/l | PS      |
| 23        | 4.73                  | -6.64            | 1.41e-04 mg/ml ; 2.28e-07 mol/l | PS      |
| 24        | 4.19                  | -6.23            | 3.71e-04 mg/ml ; 5.83e-07 mol/l | MS      |
| 25        | 4.19                  | -7.27            | 2.98e-05 mg/ml ; 5.36e-08 mol/l | PS      |
| 26        | 3.39                  | -4.95            | 5.50e-03 mg/ml ; 1.11e-05 mol/l | MS      |
| 27        | 3.47                  | -5.05            | 3.88e-03 mg/ml ; 8.82e-06 mol/l | MS      |
| 28        | 3.03                  | -5.06            | 3.50e-03 mg/ml ; 8.68e-06 mol/l | MS      |
| 29        | 1.25                  | -1.57            | 1.22e+01 mg/ml ; 2.70e-02 mol/l | VS      |
| 30        | 2.81                  | -3.32            | 2.20e-01 mg/ml ; 4.73e-04 mol/l | Soluble |

MS = Moderately soluble, PS = Poorly soluble, VS = Very soluble

**Table S7. Pharmacokinetic properties of selected Hits**

| Compounds | GIA  | BBBP | P-gp Subs | CYP1A2 Inh | CYP2C19 Inh | CYP2C9 Inh | CYP2D6 Inh | CYP3A4 Inh | Log $K_p$ (cm/s) |
|-----------|------|------|-----------|------------|-------------|------------|------------|------------|------------------|
| 1         | High | No   | No        | Yes        | No          | No         | Yes        | Yes        | -7.05            |
| 2         | Low  | No   | Yes       | No         | No          | No         | No         | No         | -8.94            |
| 3         | Low  | No   | No        | No         | No          | No         | No         | No         | -9.71            |
| 4         | Low  | No   | Yes       | No         | No          | No         | No         | No         | -8.67            |
| 5         | Low  | No   | No        | No         | No          | No         | No         | No         | -8.86            |
| 6         | High | No   | No        | No         | No          | No         | Yes        | No         | -613             |
| 7         | Low  | No   | Yes       | No         | No          | No         | No         | No         | -8.29            |
| 8         | Low  | No   | No        | No         | No          | No         | No         | No         | -10.61           |
| 9         | Low  | No   | Yes       | No         | No          | No         | No         | No         | -8.67            |
| 10        | Low  | No   | No        | No         | No          | No         | No         | No         | -9.59            |
| 11        | Low  | No   | No        | No         | No          | No         | No         | No         | -9.26            |
| 12        | High | No   | No        | Yes        | No          | Yes        | No         | No         | -6.48            |
| 13        | High | No   | No        | No         | No          | No         | No         | No         | -6.93            |
| 14        | High | No   | Yes       | No         | No          | No         | No         | No         | -7.82            |
| 15        | Low  | No   | Yes       | No         | No          | No         | No         | Yes        | -9.11            |
| 16        | High | Yes  | No        | No         | Yes         | Yes        | No         | No         | -5.79            |
| 17        | High | No   | No        | Yes        | No          | Yes        | Yes        | Yes        | -6.76            |
| 18        | High | No   | No        | No         | No          | No         | No         | No         | -6.58            |
| 19        | High | No   | No        | No         | No          | Yes        | Yes        | No         | -5.57            |
| 20        | Low  | No   | No        | No         | No          | Yes        | No         | No         | -7.04            |
| 21        | Low  | No   | Yes       | No         | No          | No         | No         | No         | -9.26            |
| 22        | High | No   | No        | No         | No          | No         | No         | Yes        | -6.56            |
| 23        | High | No   | Yes       | No         | No          | No         | No         | Yes        | -6.44            |
| 24        | High | No   | Yes       | No         | No          | Yes        | Yes        | Yes        | -7.27            |
| 25        | High | No   | No        | No         | Yes         | Yes        | Yes        | Yes        | -5.30            |
| 26        | High | No   | Yes       | No         | Yes         | Yes        | Yes        | Yes        | -7.02            |
| 27        | High | Yes  | Yes       | No         | Yes         | Yes        | Yes        | No         | -6.33            |
| 28        | High | No   | No        | Yes        | Yes         | Yes        | No         | No         | -6.09            |
| 29        | Low  | No   | No        | No         | No          | No         | No         | No         | -10.26           |
| 30        | High | No   | Yes       | No         | No          | No         | No         | No         | -8.52            |

GIA = Gastrointestinal absorption, BBBP = Blood brain barrier penetration, P-gp = P-glycoprotein, CYP = Cytochrome P450, Subs = Substrate, Inh = Inhibition, Log  $K_p$  = Skin permeation

**Table S8. Drug likeness and Medicinal properties of selected Hits (1-30)**

| Compounds | Drug likeness                                    |                                                                 |                          |                                |                                                     |      | Medicinal Chemistry                        |                                                     |      |
|-----------|--------------------------------------------------|-----------------------------------------------------------------|--------------------------|--------------------------------|-----------------------------------------------------|------|--------------------------------------------|-----------------------------------------------------|------|
|           | Lipinski                                         | Ghose                                                           | Veber                    | Egan                           | Muegge                                              | BA   | PAINS                                      | Lead-likeness                                       | SA   |
| 1         | Yes                                              | Yes                                                             | Yes                      | Yes                            | Yes                                                 | 0.55 | 1 alert:<br>catechol_A                     | Yes                                                 | 3.23 |
| 2         | 2 violations:<br>NorO>10,<br>NHorOH>5            | 2 violations:<br>MW>480,<br>WLOGP<-0.4                          | 1 violation:<br>TPSA>140 | 1 violation:<br>TPSA>131.6     | 3 violations:<br>TPSA>150,<br>H-acc>10, H-<br>don>5 | 0.17 | 1 alert:<br>catechol_A                     | 2 violations:<br>MW>350,<br>Rotors>7                | 5.09 |
| 3         | 2 violations:<br>NorO>10,<br>NHorOH>5            | 1 violation:<br>WLOGP<-0.4                                      | 1 violation:<br>TPSA>140 | 1 violation:<br>TPSA>131.6     | 3 violations:<br>TPSA>150,<br>H-acc>10, H-<br>don>5 | 0.17 | 0 alert                                    | 1 violation:<br>MW>350                              | 5.38 |
| 4         | 1 violation:<br>NHorOH>5                         | Yes                                                             | 1 violation:<br>TPSA>140 | 1 violation:<br>TPSA>131.6     | 2 violations:<br>TPSA>150,<br>H-don>5               | 0.55 | 1 alert: quinone_A                         | 1 violation:<br>MW>350                              | 4.96 |
| 5         | 2 violations:<br>NorO>10,<br>NHorOH>5            | Yes                                                             | 1 violation:<br>TPSA>140 | 1 violation:<br>TPSA>131.6     | 3 violations:<br>TPSA>150,<br>H-acc>10, H-<br>don>5 | 0.17 | 0 alert                                    | 1 violation:<br>MW>350                              | 5.36 |
| 6         | Yes                                              | Yes                                                             | Yes                      | Yes                            | Yes                                                 | 0.55 | 0 alert                                    | Yes                                                 | 3.48 |
| 7         | 1 violation: NH<br>or OH>5                       | 1 violation:<br>WLOGP<-0.4                                      | 1 violation:<br>TPSA>140 | 1 violation:<br>TPSA>131.6     | 2 violations:<br>TPSA>150,<br>H-don>5               | 0.55 | 1 alert: quinone_A                         | 1 violation:<br>MW>350                              | 5.06 |
| 8         | 3 violations:<br>MW>500,<br>NorO>10,<br>NHorOH>5 | 4 violations:<br>MW>480,<br>WLOGP<-0.4,<br>MR>130,<br>#atoms>70 | 1 violation:<br>TPSA>140 | 1 violation:<br>TPSA>131.6     | 3 violations:<br>TPSA>150,<br>H-acc>10, H-<br>don>5 | 0.17 | 0 alert                                    | 1 violation:<br>MW>350                              | 6.30 |
| 9         | 1 violation:<br>NHorOH>5                         | Yes                                                             | 1 violation:<br>TPSA>140 | No; 1 violation:<br>TPSA>131.6 | No; 2<br>violations:<br>TPSA>150,<br>H-don>5        | 0.55 | 1 alert: quinone_A                         | 1 violation:<br>MW>350                              | 4.96 |
| 10        | 2 violations:<br>NorO>10,<br>NHorOH>5            | 1 violation:<br>WLOGP<-0.4                                      | 1 violation:<br>TPSA>140 | 1 violation:<br>TPSA>131.6     | 3 violations:<br>TPSA>150,<br>H-acc>10, H-<br>don>5 | 0.17 | 1 alert: quinone_A                         | 1 violation:<br>MW>350                              | 5.17 |
| 11        | 2 violations:<br>MW>500,<br>NorO>10              | 2 violations:<br>MW>480,<br>MR>130                              | 1 violation:<br>TPSA>140 | 1 violation:<br>TPSA>131.6     | 2 violations:<br>TPSA>150,<br>H-acc>10              | 0.17 | 0 alert                                    | 2 violations:<br>MW>350,<br>Rotors>7                | 5.71 |
| 12        | Yes                                              | Yes                                                             | Yes                      | Yes                            | Yes                                                 | 0.55 | 2 alerts:<br>catechol_A,<br>hzone_phenol_B | Yes                                                 | 2.55 |
| 13        | Yes                                              | Yes                                                             | Yes                      | Yes                            | Yes                                                 | 0.56 | 0 alert                                    | Yes                                                 | 2.70 |
| 14        | Yes                                              | Yes                                                             | Yes                      | Yes                            | Yes                                                 | 0.55 | 1 alert:<br>catechol_A                     | Yes                                                 | 3.50 |
| 15        | 2 violations:<br>MW>500,<br>NorO>10              | 2 violations:<br>MW>480,<br>MR>130                              | 1 violation:<br>TPSA>140 | 1 violation:<br>TPSA>131.6     | 2 violations:<br>TPSA>150,<br>H-acc>10              | 0.17 | 0 alert                                    | 2 violations:<br>MW>350,<br>Rotors>7                | 5.80 |
| 16        | Yes                                              | Yes                                                             | Yes                      | Yes                            | Yes                                                 | 0.55 | 0 alert                                    | Yes                                                 | 3.45 |
| 17        | Yes                                              | Yes                                                             | Yes                      | Yes                            | Yes                                                 | 0.55 | 0 alert                                    | Yes                                                 | 3.41 |
| 18        | Yes                                              | Yes                                                             | Yes                      | Yes                            | Yes                                                 | 0.56 | 0 alert                                    | Yes                                                 | 2.52 |
| 19        | 2 violations:<br>MW>500,<br>MLOGP>4.15           | 4 violations:<br>MW>480,<br>WLOGP>5.6,<br>MR>130,<br>#atoms>70  | Yes                      | 1 violation:<br>WLOGP>5.88     | 2 violations:<br>MW>600,<br>XLOGP3>5                | 0.17 | 0 alert                                    | 3 violations:<br>MW>350,<br>Rotors>7,<br>XLOGP3>3.5 | 5.43 |
| 20        | 1 violation:<br>MW>500                           | 2 violations:<br>MW>480,<br>MR>130                              | 1 violation:<br>TPSA>140 | 1 violation:<br>TPSA>131.6     | Yes                                                 | 0.56 | 0 alert                                    | 1 violation:<br>MW>350                              | 3.30 |
| 21        | 2 violations:<br>MW>500,<br>NorO>10              | 2 violations:<br>MW>480,<br>MR>130                              | 1 violation:<br>TPSA>140 | 1 violation:<br>TPSA>131.6     | 2 violations:<br>TPSA>150,<br>H-acc>10              | 0.17 | 0 alert                                    | 2 violations:<br>MW>350,<br>Rotors>7                | 5.78 |
| 22        | 1 violation:<br>MW>500                           | 3 violations:<br>MW>480,<br>MR>130,<br>#atoms>70                | Yes                      | Yes                            | 1 violation:<br>#rings>7                            | 0.55 | 0 alert                                    | 2 violations:<br>MW>350,<br>XLOGP3>3.5              | 5.65 |

|    |                                        |                                                  |                          |                            |                                                     |      |         |                                                     |      |
|----|----------------------------------------|--------------------------------------------------|--------------------------|----------------------------|-----------------------------------------------------|------|---------|-----------------------------------------------------|------|
| 23 | 1 violation:<br>MW>500                 | 3 violations:<br>MW>480,<br>MR>130,<br>#atoms>70 | Yes                      | Yes                        | 2 violations:<br>MW>600,<br>XLOGP3>5                | 0.55 | 0 alert | 3 violations:<br>MW>350,<br>Rotors>7,<br>XLOGP3>3.5 | 5.46 |
| 24 | 1 violation:<br>MW>500                 | 3 violations:<br>MW>480,<br>MR>130,<br>#atoms>70 | Yes                      | Yes                        | No; 1<br>violation:<br>MW>600                       | 0.55 | 0 alert | 3 violations:<br>MW>350,<br>Rotors>7,<br>XLOGP3>3.5 | 5.19 |
| 25 | 2 violations:<br>MW>500,<br>MLOGP>4.15 | 3 violations:<br>MW>480,<br>MR>130,<br>#atoms>70 | Yes                      | Yes                        | 1 violation:<br>XLOGP3>5                            | 0.17 | 0 alert | 2 violations:<br>MW>350,<br>XLOGP3>3.5              | 5.05 |
| 26 | Yes                                    | 2 violations:<br>MW>480,<br>MR>130               | Yes                      | Yes                        | Yes                                                 | 0.55 | 0 alert | 1 violation:<br>MW>350                              | 5.41 |
| 27 | 1 violation:<br>MLOGP>4.15             | 1 violation:<br>MR>130                           | Yes                      | Yes                        | Yes                                                 | 0.55 | 0 alert | 2 violations:<br>MW>350,<br>XLOGP3>3.5              | 5.17 |
| 28 | Yes                                    | Yes                                              | Yes                      | Yes                        | Yes                                                 | 0.55 | 0 alert | 2 violations:<br>MW>350,<br>XLOGP3>3.5              | 3.23 |
| 29 | 2 violations:<br>NorO>10,<br>NHorOH>5  | 1 violation:<br>WLOGP<-0.4                       | 1 violation:<br>TPSA>140 | 1 violation:<br>TPSA>131.6 | 3 violations:<br>TPSA>150,<br>H-acc>10, H-<br>don>5 | 0.17 | 0 alert | 1 violation:<br>MW>350                              | 5.20 |
| 30 | Yes                                    | 1 violation:<br>MR>130                           | Yes                      | Yes                        | Yes                                                 | 0.55 | 0 alert | 1 violation:<br>MW>350                              | 5.24 |

**Table S9. The ADMET results of admetSAR server**

| Compounds | Caco-2 | HIA | P-gp I | P-gp S | Carcinogenicity | Ames Mutagenesis | AOT | Dose for AOT (kg/mol) | AD      |
|-----------|--------|-----|--------|--------|-----------------|------------------|-----|-----------------------|---------|
| 1         | No     | Yes | No     | No     | No              | Yes              | III | 2.559                 | ID      |
| 2         | No     | Yes | No     | No     | No              | No               | III | 2.805                 | Warning |
| 3         | No     | Yes | No     | No     | No              | Yes              | III | 3.287                 | Warning |
| 4         | No     | Yes | No     | No     | No              | No               | III | 2.243                 | ID      |
| 5         | No     | Yes | No     | No     | No              | Yes              | III | 2.174                 | ID      |
| 6         | No     | Yes | No     | No     | No              | No               | II  | 2.444                 | ID      |
| 7         | No     | Yes | No     | No     | No              | No               | III | 2.403                 | ID      |
| 8         | No     | Yes | No     | No     | No              | Yes              | III | 2.977                 | Warning |
| 9         | No     | Yes | No     | No     | No              | No               | III | 2.243                 | ID      |
| 10        | No     | Yes | No     | No     | No              | No               | IV  | 2.419                 | ID      |
| 11        | No     | Yes | Yes    | No     | No              | Yes              | III | 2.843                 | ID      |
| 12        | No     | Yes | No     | No     | No              | Yes              | III | 1.723                 | ID      |
| 13        | No     | Yes | No     | No     | No              | No               | III | 1.681                 | ID      |
| 14        | No     | Yes | No     | No     | No              | Yes              | IV  | 1.972                 | ID      |
| 15        | No     | Yes | Yes    | Yes    | No              | Yes              | III | 2.876                 | ID      |
| 16        | Yes    | Yes | No     | No     | No              | No               | III | 2.257                 | ID      |
| 17        | Yes    | Yes | No     | No     | No              | No               | III | 2.689                 | ID      |
| 18        | No     | Yes | No     | No     | No              | No               | III | 1.749                 | ID      |
| 19        | No     | Yes | Yes    | No     | No              | Yes              | III | 2.661                 | ID      |
| 20        | No     | Yes | Yes    | No     | No              | No               | III | 1.652                 | ID      |
| 21        | No     | Yes | Yes    | No     | No              | Yes              | III | 2.664                 | ID      |
| 22        | No     | Yes | Yes    | Yes    | No              | Yes              | III | 2.537                 | warning |
| 23        | No     | Yes | Yes    | Yes    | No              | No               | III | 3.19                  | ID      |
| 24        | No     | Yes | Yes    | Yes    | No              | No               | III | 2.263                 | ID      |
| 25        | No     | Yes | Yes    | Yes    | No              | Yes              | III | 2.443                 | ID      |
| 26        | No     | Yes | Yes    | Yes    | No              | Yes              | III | 2.678                 | ID      |
| 27        | No     | Yes | Yes    | Yes    | No              | Yes              | III | 2.445                 | ID      |
| 28        | No     | Yes | No     | No     | No              | No               | III | 1.906                 | ID      |
| 29        | No     | Yes | No     | No     | No              | Yes              | III | 3.205                 | warning |
| 30        | No     | Yes | Yes    | Yes    | No              | Yes              | III | 2.237                 | ID      |

**AD = Applicability domain, AOT = Acute Oral Toxicity, HIA = Human Intestinal Absorption, BBBP = Blood brain barrier permeability, HOB = human oral bioavailability, ID = In Domain, P-gp I = P-glycoprotein inhibitor, P-gp S = P-glycoprotein Substrate**

For In domain, Out domain and Warning, please read (<http://lmmd.ecust.edu.cn/admetSAR2/about/ad>). In admetSAR (v2), six physicochemical or topological properties are used to define the applicability domain, which are molecular weight, *alogP*, number of atoms, number of rings, H-bond acceptors, and H-bond donors. We analysed the distribution of these properties in all the training sets of the predictive models.

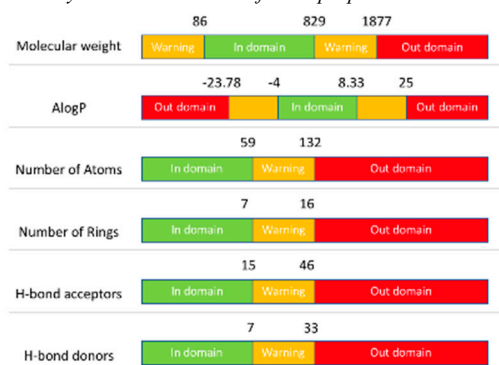

Compounds with the molecular weight higher than 99% or lower than 99% of the training set will be regarded as warning, and if it is higher than the maximum of the training set, it will be tagged as out domain. Similarly, compounds with the *alogP* higher than 99% or lower than 99% of the training set will be regarded as warning, and if it is higher than the maximum or lower than the minimum of the training set, it will be tagged as out domain. For the other four stistics properties, since their lower bound is 0 and is reasonable, we only tag the overhigh compounds.

**Table S10. Interaction Analysis of Selected Hits (1-30)**

| Compounds | Binding Subsites | Ligand Atom | Receptor Atoms | Bond | Distance (Å) |
|-----------|------------------|-------------|----------------|------|--------------|
| <b>1</b>  | S1               | O25         | O-Phe140       | HBD  | 2.14         |
|           | S3               | O29         | O-His164       | HBD  | 2.07         |
|           | S1, S2           | O31         | SG-Cys145      | HBD  | 3.34         |
|           | S1               | O22         | NE2-His163     | HBA  | 1.58         |
| <b>2</b>  | S1               | O17         | O-Glu166       | HBD  | 2.01         |
|           | S1, S2           | O50         | SG-Cys145      | HBD  | 2.1          |
|           | S3               | O54         | SD-Met165      | HBD  | 2.51         |
| <b>3</b>  | Near S1          | O23         | O-Leu141       | HBD  | 2.18         |
|           | S1               | O42         | O-Glu166       | HBD  | 2.32         |
|           | S1               | O22         | N-Glu166       | HBA  | 2.46         |
| <b>4</b>  | S1               | O47         | O-Glu166       | HBD  | 2.2          |
|           | S1               | O20         | N-Glu166       | HBA  | 3.07         |
|           | D3               | O49         | NE2-Gln192     | HBA  | 3.28         |
| <b>5</b>  | S1, S2           | O22         | SG-Cys145      | HBD  | 3.25         |
|           | Near S1          | O25         | O-Leu141       | HBD  | 1.87         |
| <b>6</b>  | D3               | O27         | O-Thr190       | HBD  | 2.34         |
|           | Near S1          | O34         | OD1-Asn142     | HBD  | 2.26         |
|           | D3               | O27         | NE2-Gln192     | HBA  | 1.8          |
| <b>7</b>  | S1, S2           | O20         | SG-Cys145      | HBD  | 2.46         |
|           | S1               | O21         | OE1-Glu166     | HBD  | 2.39         |
|           | D3               | O47         | O-Thr190       | HBD  | 1.77         |
|           | S2               | C13         | 5 ring His41   | H-Pi | 3.09         |
|           | S2               | O23         | 5-ring His41   | H-Pi | 3.31         |
| <b>8</b>  | S1, S2           | O11         | SG-CYS145      | HBD  | 2.83         |
|           | Near S1          | O46         | O-LEU141       | HBD  | 2.15         |
|           | S1               | O24         | N-GLY143       | HBA  | 1.57         |
|           | S1               | O46         | NE2-HIS163     | HBA  | 2.49         |
|           | D3               | O69         | N-THR190       | HBA  | 2.03         |
|           | D3               | O69         | NE2-GLN192     | HBA  | 2.22         |
|           | S2               | 6-ring      | CE1-HIS41      | H-Pi | 3.19         |
| <b>9</b>  | S1               | O23         | SG-Ser144      | HBD  | 2.93         |
|           | D3               | O45         | N-Thr190       | HBA  | 2.92         |
|           | D3               | O45         | NE2-Gln192     | HBA  | 2.8          |
| <b>10</b> | D3               | O49         | O-GLN192       | HBD  | 1.57         |
|           | D3               | O39         | NE2-Gln192     | HBA  | 1.9          |
|           | S1               | O51         | NE2-His163     | HBA  | 2.41         |
|           | D3               | O55         | N-Thr190       | HBA  | 2.48         |
|           | S2               | C13         | 5-ring His41   | H-pi | 3.28         |
| <b>11</b> | Near S1          | O38         | OD1-Asn142     | HBD  | 2.12         |
|           | D3               | O66         | O-Arg188       | HBD  | 2.17         |
|           | S1               | O13         | N-Glu166       | HBA  | 3            |
| <b>12</b> | D3               | O30         | O-Arg188       | HBD  | 2.42         |
|           | S1               | N18         | N-Glu166       | HBA  | 2.1          |
| <b>13</b> | D3               | O28         | O-Arg188       | HBD  | 2.34         |
|           | S1               | O30         | O-Glu166       | HBD  | 1.9          |
|           | S1               | O33         | N-Glu166       | HBA  | 1.62         |



|           |        |        |              |          |       |
|-----------|--------|--------|--------------|----------|-------|
| <b>14</b> | S1     | O28    | OG-SER144    | HBD      | 2.85  |
|           | S1     | O16    | N-GLU166     | HBA      | 2.66  |
| <b>15</b> | S1     | O26    | NE2-HIS163   | HBA      | 3.25  |
|           | D3     | O47    | N-THR190     | HBA      | 3.24  |
|           | D3     | O47    | NE2-GLN192   | HBA      | 2.82  |
| <b>16</b> | S1     | O40    | N-SER144     | HBA      | 2.98  |
|           | S1     | O40    | OG-SER144    | HBA      | 2.63  |
|           | S1     | O41    | N-GLY143     | HBA      | 2.12  |
| <b>17</b> | D3     | O22    | N-Thr190     | HBA      | 2.52  |
|           | D3     | O22    | NE2-Gln192   | HBA      | 2.48  |
| <b>18</b> | D3     | O29    | O-Gln192     | HBD      | 2.05  |
|           | S1     | O14    | N-Glu166     | HBA      | 1.60  |
|           | S1     | 5-ring | CB-Glu166    | $\Pi$ -H | 3.07  |
| <b>19</b> | S1     | N-10   | N-GLU166     | HBA      | 2.31  |
|           | S1     | 6-ring | N-GLU166     | $\Pi$ -H | 3.64  |
| <b>20</b> | S1, S2 | O13    | N-CYS145     | HBA      | 3.00  |
|           | S1     | O52    | N-SER144     | HBA      | 2.638 |
|           | S1     | O52    | OG-SER144    | HBA      | 1.96  |
| <b>21</b> | S1, S2 | O62    | SG-CYS145    | HBD      | 2.38  |
| <b>22</b> | S3     | N57    | O-HIS164     | HBD      | 2.80  |
| <b>23</b> | S1     | O45    | N-GLU166     | HBA      | 2.72  |
|           | S3     | 6-ring | CA-MET165    | $\Pi$ -H | 2.76  |
| <b>24</b> | S1     | N41    | N-GLU166     | HBA      | 2.37  |
| <b>25</b> | S1     | N23    | O-GLU166     | HBA      | 1.71  |
|           | S1     | N58    | NE2-HIS163   | HBA      | 2.54  |
| <b>26</b> | S1     | O8     | N-GLY143     | HBA      | 2.25  |
|           | S1     | N37    | N-GLY143     | HBA      | 3.24  |
| <b>27</b> | S1     | N18    | N-GLU166     | HBA      | 2.76  |
|           | S1     | N22    | N-GLU166     | HBA      | 3.04  |
| <b>28</b> | S1     | N15    | N-Ser144     | HBA      | 2.56  |
|           | S1     | N15    | OG-Ser144    | HBA      | 2.32  |
| <b>29</b> | S1     | O38    | O-GLU166     | HBA      | 1.77  |
|           | S1     | O53    | O-PHE140     | HBD      | 2.23  |
|           | S1     | O23    | N-GLU166     | HBA      | 2.55  |
|           | S1     | O33    | N-GLU166     | HBA      | 2.90  |
|           | S2     | 6-ring | 5-ring-HIS41 | Pi-pi    | 3.93  |
| <b>30</b> | S1     | O9     | N-GLY143     | HBA      | 1.87  |

*HBA = Hydrogen bond acceptor, HBD = Hydrogen bond donor, D3 = Domain 3*

**Table S11. Protein-ligand complexes used in Re-docking and Cross-docking**

| S. No. | PDB ID | Ligands                                                                                                                                                                                                   | Interacting Residues                                                                                                                                                    | Resolution (Å) | Reference                                                                                                                                                                      |
|--------|--------|-----------------------------------------------------------------------------------------------------------------------------------------------------------------------------------------------------------|-------------------------------------------------------------------------------------------------------------------------------------------------------------------------|----------------|--------------------------------------------------------------------------------------------------------------------------------------------------------------------------------|
| 1      | 6M2N   | 5,6,7-trihydroxy-2-phenyl-4H-chromen-4-one ( <b>3WL</b> , <b>Baicalein</b> , <b>IC<sub>50</sub> = 0.94 μM</b> )*                                                                                          | 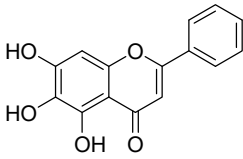<br>Gly143<br>,<br>Glu166                                                              | 2.20           | Su, H-x, et al. Anti-SARS-CoV-2 activities in vitro of Shuanghuanglian preparations and bioactive ingredients, Acta Pharmacologica Sinica, 41, 1167–1177 (2020)                |
| 2      | 6LU7   | N-[(5-methylisoxazol-3-yl)carbonyl]alanyl-l-valyl-n~1~-(1r,2z)-4-(benzyloxy)-4-oxo-1-[(3r)-2-oxopyrrolidin-3-yl]methyl}but-2-enyl)-l-leucinamide ( <b>N3</b> , <b>IC<sub>50</sub> = 0.4 and 1.0 μM</b> )* | <br>Phe140<br>,<br>Gly143<br>,<br>His163<br>,<br>Glu166<br>,<br>Gln189<br>,<br>Thr190 | 2.16           | Jin, Z., et al., Structure of M <sup>pro</sup> from COVID-19 virus and discovery of its inhibitors. Nature, 582, 289–293 (2020)                                                |
| 3      | 6W63   | N-(4-tert-butylphenyl)-N-[(1R)-2-(cyclohexylamino)-2-oxo-1-(pyridin-3-yl)ethyl]-1H-imidazole-4-carboxamide ( <b>X77</b> , <b>K<sub>d</sub> = 0.057 μM</b> )*                                              | <br>Gly143<br>,<br>His163<br>,<br>Glu166                                              | 2.10           | Activity is taken from <a href="https://www.medchemexpress.com/x77.html">https://www.medchemexpress.com/x77.html</a>                                                           |
| 4      | 6W79   | N-(4-tert-butylphenyl)-N-[(1R)-2-(cyclohexylamino)-2-oxo-1-(pyridin-3-yl)ethyl]-1H-imidazole-4-carboxamide ( <b>X77</b> , <b>K<sub>d</sub> = 0.057 μM</b> )*                                              | <br>Gly143<br>,<br>His163<br>,<br>Glu166                                             | 1.46           | <a href="https://www.medchemexpress.com/x77.html">https://www.medchemexpress.com/x77.html</a>                                                                                  |
| 5      | 6WNP   | Boceprevir ( <b>IC<sub>50</sub> = 4.13 μM</b> )*                                                                                                                                                          | <br>His41,<br>Gly143<br>,<br>Cys145,<br>Glu166                                       | 1.44           | Ma, C. et al., Boceprevir, GC-376, and calpain inhibitors II, XII inhibit SARS-CoV-2 viral replication by targeting the viral main protease, Cell Research, 30, 678–692 (2020) |

|   |          |                                                                                                                                                                                                                                                                                                                                                                                        |                                                                                     |                                                                                              |      |                                                                                                                                                                        |
|---|----------|----------------------------------------------------------------------------------------------------------------------------------------------------------------------------------------------------------------------------------------------------------------------------------------------------------------------------------------------------------------------------------------|-------------------------------------------------------------------------------------|----------------------------------------------------------------------------------------------|------|------------------------------------------------------------------------------------------------------------------------------------------------------------------------|
| 6 | 6W<br>TK | N~2~<br>[(benzyloxy)carbonyl<br>]-N-{(2S)-1-<br>hydroxy-3-[(3S)-2-<br>oxopyrrolidin-3-<br>yl]propan-2-yl}-L-<br>leucinamide<br>(UED, IC <sub>50</sub> = <b>0.40</b><br>μM)                                                                                                                                                                                                             | 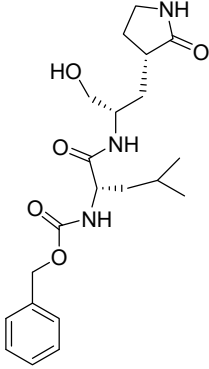   | Phe140<br>,<br>Gly143<br>,<br>Cys145,<br>His163<br>,<br>His164<br>,<br>Glu166<br>,<br>Gln189 | 2.00 | Vuong, W et al., Feline coronavirus drug inhibits the main protease of SARS-CoV-2 and blocks virus replication, Nature Communications, 11, 1-8 (2020)                  |
| 7 | 6Y2<br>F | ~{tert}-butyl ~{N}-<br>[1-[(2~{S})-3-<br>cyclopropyl-1-<br>oxidanylidene-1-<br>[[[(2~{S}),3~{R})-3-<br>oxidanyl-4-<br>oxidanylidene-1-<br>[(3~{S})-2-<br>oxidanylidene-pyrroli-<br>din-3-yl]-4-<br>[(phenylmethyl)amin-<br>o]butan-2-<br>yl]amino]propan-2-<br>yl]-2-oxidanylidene-<br>pyridin-3-<br>yl]carbamate ( <b>O6K</b> ,<br><b>13b</b> , IC <sub>50</sub> = <b>0.67</b><br>μM) |   | His41,<br>Phe140<br>,<br>Gly143<br>,<br>Cys145,<br>His163<br>,<br>His164<br>,<br>Glu166      | 1.95 | Zhang, L. et al., Crystal structure of SARS-CoV-2 main protease provides a basis for design of improved α-ketoamide inhibitors, Science, 24, 368, 6489, 409-412 (2020) |
| 8 | 6ZR<br>T | Telaprevir<br>((1S,3ar,6as)-2-<br>[(2S)-2-({(2S)-2-<br>cyclohexyl-2-<br>[(pyrazin-2-<br>ylcarbonyl)amino]ac-<br>etyl)amino)-3,3-<br>dimethylbutanoyl]-<br>N-[(2R,3S)-1-<br>(cyclopropylamino)-<br>2-hydroxy-1-<br>oxohexan-3-<br>yl]octahydrocyclope-<br>nta[c]pyrrole-1-<br>carboxamide)<br>(IC <sub>50</sub> = <b>55.72</b> μM)                                                      |  | His41,<br>Gly143<br>,<br>Cys145,<br>His164<br>,<br>Glu166<br>,<br>Gln189                     | 2.10 | Oerlemans, R., et al. Repurposing the HCV NS3-4A protease drug boceprevir as COVID-19 therapeutics, RSC Med Chem 12, 370-379 (2020)                                    |

|    |                    |                                                                                                                                                                                             |                                                                                     |                                                                                                             |      |                                                                                                                                                                                                                                                                |
|----|--------------------|---------------------------------------------------------------------------------------------------------------------------------------------------------------------------------------------|-------------------------------------------------------------------------------------|-------------------------------------------------------------------------------------------------------------|------|----------------------------------------------------------------------------------------------------------------------------------------------------------------------------------------------------------------------------------------------------------------|
| 9  | 7BQ<br>Y           | N-[(5-methylisoxazol-3-yl)carbonyl]alanyl-L-valyl-L-1-~((1r,2z)-4-(benzyloxy)-4-oxo-1-~{[(3r)-2-oxopyrrolidin-3-yl]methyl}but-2-enyl)-L-leucinamide (N3, IC <sub>50</sub> = 0.4 and 1.0 μM) | 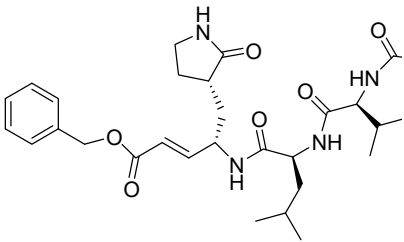   | Phe140<br>,<br>Gly143<br>,<br>Cys145,<br>His163<br>,<br>His164<br>,<br>Glu166<br>,<br>Gln189<br>,<br>Thr190 | 1.70 | Jin, Z., et al., Structure of M <sup>pro</sup> from COVID-19 virus and discovery of its inhibitors. Nature, 582, 289–293 (2020)                                                                                                                                |
| 10 | 7D1<br>M<br>(7BRR) | (1S,2S)-2-({N-[(benzyloxy)carbonyl]-L-leucyl}amino)-1-hydroxy-3-[(3S)-2-oxopyrrolidin-3-yl]propane-1-sulfonic acid (GC376, IC <sub>50</sub> = 0.15 μM)                                      |   | Phe140<br>,<br>Cys145,<br>His163<br>,<br>Glu166<br>,<br>Gln189                                              | 1.40 | Fu, L. et al., Both Boceprevir and GC376 efficaciously inhibit SARS-CoV-2 by targeting its main protease, Nat Commun, 11, 4417-4417 (2020)                                                                                                                     |
| 11 | 7JU<br>7           | Masitinib (IC <sub>50</sub> = 2.5 and 35 μM)                                                                                                                                                |  | His163<br>,<br>His164                                                                                       | 1.60 | Drayman, N., et al., Drug repurposing screen identifies masitinib as a 3CLpro inhibitor that blocks replication of SARS-CoV-2 in vitro, bioRxiv, doi: <a href="https://doi.org/10.1101/2020.08.31.274639">https://doi.org/10.1101/2020.08.31.274639</a> , 2020 |
| 12 | 5R8<br>0           | Methyl 4-sulfamoylbenzoate                                                                                                                                                                  |  | Glu166                                                                                                      | 1.93 | Douangamath, A., et al. Crystallographic and electrophilic fragment screening of the SARS-CoV-2 main protease, Nat Commun 11: 5047-5047 (2020)                                                                                                                 |
| 13 | 5R8<br>1           | 1-methyl-3,4-dihydro-2~{H}-quinoline-7-sulfonamide                                                                                                                                          |  | ---                                                                                                         | 1.95 | Douangamath, A., et al. Crystallographic and electrophilic fragment screening of the SARS-CoV-2 main protease, Nat Commun 11: 5047-5047 (2020)                                                                                                                 |
| 14 | 5R8<br>2           | 6-(ethylamino)pyridine-3-carbonitrile                                                                                                                                                       |  | Gln189                                                                                                      | 1.31 | Douangamath, A., et al. Crystallographic and electrophilic fragment screening of the SARS-CoV-2 main protease, Nat Commun 11: 5047-5047 (2020)                                                                                                                 |

|        |          |                                                              |                                                                                     |                       |      |                                                                                                                                                |
|--------|----------|--------------------------------------------------------------|-------------------------------------------------------------------------------------|-----------------------|------|------------------------------------------------------------------------------------------------------------------------------------------------|
| 1<br>5 | 5R8<br>3 | N-phenyl-N'-pyridin-3-ylurea                                 | 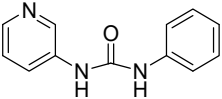   | His163<br>,<br>Glu166 | 1.58 | Douangamath, A., et al. Crystallographic and electrophilic fragment screening of the SARS-CoV-2 main protease, Nat Commun 11: 5047-5047 (2020) |
| 1<br>6 | 5R8<br>4 | 2-cyclohexyl-~{N}-pyridin-3-yl-ethanamide                    |    | His163<br>,<br>Glu166 | 1.83 | Douangamath, A., et al. Crystallographic and electrophilic fragment screening of the SARS-CoV-2 main protease, Nat Commun 11: 5047-5047 (2020) |
| 1<br>7 | 5R7<br>Y | N-(2-phenylethyl)methane sulfonamide                         |    | ---                   | 1.65 | Douangamath, A., et al. Crystallographic and electrophilic fragment screening of the SARS-CoV-2 main protease, Nat Commun 11: 5047-5047 (2020) |
| 1<br>8 | 5R7<br>Z | ~{N}-[2-(5-fluoranyl-1~{H}-indol-3-yl)ethyl]ethanamide       |   | His41,<br>Glu166      | 1.59 | Douangamath, A., et al. Crystallographic and electrophilic fragment screening of the SARS-CoV-2 main protease, Nat Commun 11: 5047-5047 (2020) |
| 1<br>9 | 5RE<br>4 | N-(4-methylpyridin-3-yl)acetamide                            |  | His163<br>,<br>Glu166 | 1.88 | Douangamath, A., et al. Crystallographic and electrophilic fragment screening of the SARS-CoV-2 main protease, Nat Commun 11: 5047-5047 (2020) |
| 2<br>0 | 5RE<br>9 | 2-(4-methylphenoxy)-1-(4-methylpiperazin-4-ium-1-yl)ethanone |  | ---                   | 1.72 | Douangamath, A., et al. Crystallographic and electrophilic fragment screening of the SARS-CoV-2 main protease, Nat Commun 11: 5047-5047 (2020) |

#### Other M<sup>pro</sup> Inhibitors selected from Publications

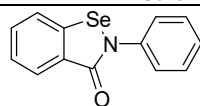

**Ebselen** (IC<sub>50</sub> = 0.67 μM)

Ampornnanai, K. et al., Inhibition mechanism of SARS-CoV-2 main protease by ebselen and its derivatives, Nature Communications, 12, (2021)

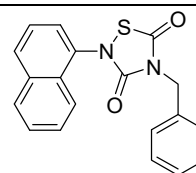

**Tideglusib** (IC<sub>50</sub> = 1.55 μM)

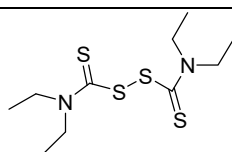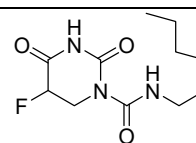

| <b>Disulfiram</b> (IC <sub>50</sub> = 9.35 μM)                                    | <b>Carmofur</b> (IC <sub>50</sub> = 1.82 μM)                                        |
|-----------------------------------------------------------------------------------|-------------------------------------------------------------------------------------|
| 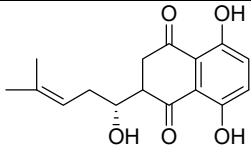 |  |
| <b>Shikonin</b> (IC <sub>50</sub> = 15.75 μM)                                     | <b>PX-12</b> (IC <sub>50</sub> = 21.39 μM)                                          |

Fifteen known inhibitors of M<sup>pro</sup> including N3 (ligand complexed in 6LU7), Baicalein, X77, Boceprevir, UED, O6K, Telaprevir, GC376, Masitinib, Ebselen, Tideglusib, Disulfiram, Carmofur, Shikonin, and PX-12 (Selected from Literature: Nitsche, C.; Ullrich, S. The SARS-CoV-2 main protease as drug target. *Bioorg Med Chem Lett.* **2020**, *30*, 127377).
