# Supplementary material
Source: MDPI journal article supplement (https://www.mdpi.com/1424-8247/14/9/896)
Supplement: s1 [file s1]

|    | mol         | SMILES                                                                                                  |
|----|-------------|---------------------------------------------------------------------------------------------------------|
| 1  | S60         | <chem>BrC1=C[C@]2([C@@H](CC[C@@]3(C2C(=O)C=C2[C@@H]4[C@@H](C)[C@@H](CC[C@@]4(CC[C@]23C)C)C)[C</chem>    |
| 2  | S11         | <chem>Br[C@@H]1C[C@]2(C3[C@](CCC2[C@](C(Cc2ccccc2)=O)(C)C1=O)(C)[C@]1(CC[C@@]2([C@H](C1=CC3=</chem>     |
| 3  | S61         | <chem>Br[C@@H]1C[C@]2([C@@H](CC[C@@]3(C2C(=O)C=C2[C@@H]4[C@@H](C)[C@@H](CC[C@@]4(CC[C@]23C)C)C</chem>   |
| 4  | S12         | <chem>Br[C@@H]1C[C@]2([C@@H](CC[C@@]3(C2C(=O)C=C2[C@@H]4[C@@H](C)[C@@H](CC[C@@]4(CC[C@]23C)C)C</chem>   |
| 5  | S14         | <chem>Br[C@@H]1C[C@]2([C@@H](CC[C@@]3(C2C(=O)C=C2[C@@H]4[C@@H](C)[C@@H](CC[C@@]4(CC[C@]23C)C)C</chem>   |
| 6  | S13         | <chem>Br[C@@H]1C[C@]2([C@@H](CC[C@@]3(C2C(=O)C=C2[C@@H]4[C@@H](C)[C@@H](CC[C@@]4(CC[C@]23C)C)C</chem>   |
| 7  | S46         | <chem>Br[C@H]1C=C[C@@]1([C@@H]2CC[C@@]3(C[C@@]12C)C(=O)C=C1[C@@H]2[C@@H](C)[C@@H](CC[C@@]2(CC[C</chem>  |
| 8  | S42         | <chem>Br[C@H]1[C@@]1([C@@H]2CC[C@@]3(C[C@@]2(CC1=O)C)C(=O)C=C1[C@@H]2[C@@H](C)[C@@H](CC[C@@]2(CC</chem> |
| 9  | S43         | <chem>Br[C@H]1[C@@]1([C@@H]2CC[C@@]3(C[C@@]2(C[C@@H]1Br)C)C(=O)C=C1[C@@H]2[C@@H](C)[C@@H](CC[C@@</chem> |
| 10 | S40         | <chem>Br[C@H]1[C@@]1([C@@H]2CC[C@@]3(C[C@@]2(C[C@@H]10)C)C(=O)C=C1[C@@H]2[C@@H](C)[C@@H](CC[C@@</chem>  |
| 11 | C-7.mol     | <chem>BrC1c2c(C(N(CC2)Cc2nnn(c2)-c2ccc(OC)c(OC)c2)C20Cc3c2ccc(OC)c30C)c(OC)c20C0c12</chem>              |
| 12 | C-4.mol     | <chem>BrC1c2c(C(N(CC2)Cc2nnn(c2)-c2ccc(F)cc2)C20Cc3c2ccc(OC)c30C)c(OC)c20C0c12</chem>                   |
| 13 | N-T-10      | <chem>BrC1c2c(C(N(CC2)Cc2nnn(c2)-c2ccc(OC)cc2)C20C(=O)c3c2ccc(OC)c30C)c(OC)c20C0c12</chem>              |
| 14 | C-5.mol     | <chem>BrC1c2c(C(N(CC2)Cc2nnn(c2)-c2ccc(cc2)C)C20Cc3c2ccc(OC)c30C)c(OC)c20C0c12</chem>                   |
| 15 | C-10.mol    | <chem>BrC1c2c(C(N(CC2)Cc2nnn(c2)-c2ccccc2)C20Cc3c2ccc(OC)c30C)c(OC)c20C0c12</chem>                      |
| 16 | N-T-8       | <chem>BrC1c2c(C(N(CC2)Cc2nnn(c2)CC(O)(C)C)C20C(=O)c3c2ccc(OC)c30C)c(OC)c20C0c12</chem>                  |
| 17 | N-T-11      | <chem>BrC1c2c(C(N(CC2)Cc2nnn(c2)CC(O)C0c2ccccc2)C20C(=O)c3c2ccc(OC)c30C)c(OC)c20C0c12</chem>            |
| 18 | C-12.mol    | <chem>BrC1c2c(C(N(CC2)Cc2nnn(c2)CC(O)C0c2ccccc2)C20Cc3c2ccc(OC)c30C)c(OC)c20C0c12</chem>                |
| 19 | C-9.mol     | <chem>BrC1c2c(C(N(CC2)Cc2nnn(c2)CC(O)c2ccccc2)C20Cc3c2ccc(OC)c30C)c(OC)c20C0c12</chem>                  |
| 20 | C-11.mol    | <chem>BrC1c2c(C(N(CC2)Cc2nnn(c2)Cc2ccc(Br)cc2)C20Cc3c2ccc(OC)c30C)c(OC)c20C0c12</chem>                  |
| 21 | N-T-9       | <chem>BrC1c2c(C(N(CC2)Cc2nnn(c2)Cc2ccc(cc2)C)C20C(=O)c3c2ccc(OC)c30C)c(OC)c20C0c12</chem>               |
| 22 | C-6.mol     | <chem>BrC1c2c(C(N(CC2)Cc2nnn(c2)Cc2ccccc2)C20Cc3c2ccc(OC)c30C)c(OC)c20C0c12</chem>                      |
| 23 | TS-109.cdx  | <chem>BrC1cc(N2/C/SC=C2c2ccccc2)=N/N=C(\C)/c2cc30CC0c3cc2)ccc1</chem>                                   |
| 24 | MI-142.mol  | <chem>BrC1cc(NC(=S)N\N=C(/C)\c2cc(sc2C)C)ccc1</chem>                                                    |
| 25 | MI-22.mol   | <chem>BrC1cc(NC(=S)N\N=C(/C)\c2cc3c(cc2)ccccc3)ccc1</chem>                                              |
| 26 | MI-102.mol  | <chem>BrC1cc(NC(=S)N\N=C(/C)\c2ncnc2C)C)ccc1</chem>                                                     |
| 27 | MI-122.mol  | <chem>BrC1cc(NC(=S)N\N=C(/C)\c2sc(nc2C)C)ccc1</chem>                                                    |
| 28 | MI-182.mol  | <chem>BrC1cc(NC(=S)N\N=C\2/CCc3cc(OC)c(OC)cc/23)ccc1</chem>                                             |
| 29 | MI-202.mol  | <chem>BrC1cc(NC(=S)N\N=C\c2ccc([N+](=O)[O-])cc2)ccc1</chem>                                             |
| 30 | RXN-20      | <chem>BrC1cc(ccc1)-c1n2N=C(CSc2nn1)c1c2c(ccc1)cccc2</chem>                                              |
| 31 | RXN-22      | <chem>BrC1cc(ccc1)-c1n2N=C(CSc2nn1)c1cc(Cl)c(Cl)cc1</chem>                                              |
| 32 | RXN-16.cdx  | <chem>BrC1cc(ccc1)-c1n2N=C(CSc2nn1)c1ccc(Cl)cc1</chem>                                                  |
| 33 | RXN-17.cdx  | <chem>BrC1cc(ccc1)-c1n2N=C(CSc2nn1)c1ccc(F)cc1</chem>                                                   |
| 34 | RXN-15.cdx  | <chem>BrC1cc(ccc1)-c1n2N=C(CSc2nn1)c1ccc(OC)cc1</chem>                                                  |
| 35 | RXN-21      | <chem>BrC1cc(ccc1)-c1n2N=C(CSc2nn1)c1ccc([N+](=O)[O-])cc1</chem>                                        |
| 36 | RXN-19      | <chem>BrC1cc(ccc1)-c1n2N=C(CSc2nn1)c1ccc(cc1)-c1ccccc1</chem>                                           |
| 37 | RXN-18.cdx  | <chem>BrC1cc(ccc1)-c1n2N=C(CSc2nn1)c1ccc(cc1)C</chem>                                                   |
| 38 | RXN-28      | <chem>BrC1cc(ccc1)-c1n2N=C(Sc2nn1)C0c1ccc(F)cc1</chem>                                                  |
| 39 | RXN-24      | <chem>BrC1cc(ccc1)-c1n2N=C(Sc2nn1)C0c1cccc(O)cc1</chem>                                                 |
| 40 | RXN-27      | <chem>BrC1cc(ccc1)-c1n2N=C(Sc2nn1)C0c1ccc(OC)cc1</chem>                                                 |
| 41 | RXN-26      | <chem>BrC1cc(ccc1)-c1n2N=C(Sc2nn1)C0c1cccc(cc1)C</chem>                                                 |
| 42 | RXN-25      | <chem>BrC1cc(ccc1)-c1n2N=C(Sc2nn1)C0c1cccc1C</chem>                                                     |
| 43 | RXN-23      | <chem>BrC1cc(ccc1)-c1n2N=C(Sc2nn1)C0c1cccc10</chem>                                                     |
| 44 | N-T-2       | <chem>BrC1cc(ccc1)Cn1nnc(c1)CN1CCc2c(C1C10C(=O)c3c1cccc(OC)c30C)c(OC)c10C0c1c2</chem>                   |
| 45 | R-NPG-7.cdx | <chem>BrC1cc(ccc1)\C=C(\N1C(=O)c2c(cccc2)C1=O)/C(O)=O</chem>                                            |
| 46 | 6JA.mol     | <chem>BrC1cc2C3=NC4=NN(C(N)C4C=C3C(OC2cc1)NCC10CCCC1)c1cccc1</chem>                                     |
| 47 | 6KA.mol     | <chem>BrC1cc2C3=NC4=NN(C(N)C4C=C3C(OC2cc1)NCc1ccccc1)c1ccc(OC)cc1</chem>                                |
| 48 | 6GA.mol     | <chem>BrC1cc2C3=NC4=NN(C(N)C4C=C3C(OC2cc1)NCc1ccccc1)c1cccc1</chem>                                     |
| 49 | 4D.mol      | <chem>BrC1cc2c(OC=C(C3C4C(OC5C3C(=O)CC(C5)(C)C)CC(C4=O)(C)C)C2=O)cc1</chem>                             |
| 50 | 4G.mol      | <chem>BrC1cc2c(OC=C(C3C4C(OC5C3C(=O)CC5)CCCC4=O)C2=O)cc1</chem>                                         |
| 51 | F-12        | <chem>BrC1ccc(-n2nnc(c2)CN2CCc3c(C2C20Cc4c2ccc(OC)c40C)c(OC)c20C0c2c3)cc1</chem>                        |
| 52 | SB-10.cdx   | <chem>BrC1ccc(cc1)CC(=O)N\N=C(\C)C1cccc1</chem>                                                         |
| 53 | SB-11.cdx   | <chem>BrC1ccc(cc1)CC(=O)N\N=C\CCCC</chem>                                                               |
| 54 | SB-1.cdx    | <chem>BrC1ccc(cc1)CC(=O)N\N=C\c1cc(O)c(O)cc1</chem>                                                     |
| 55 | SB-3.cdx    | <chem>BrC1ccc(cc1)CC(=O)N\N=C\c1cc(OC(=O)C)c(OC)cc1</chem>                                              |
| 56 | SB-8.cdx    | <chem>BrC1ccc(cc1)CC(=O)N\N=C\c1cc(OC(=O)C)ccc1</chem>                                                  |
| 57 | SB-14.cdx   | <chem>BrC1ccc(cc1)CC(=O)N\N=C\c1cc([N+](=O)[O-])ccc1</chem>                                             |
| 58 | SB-6.cdx    | <chem>BrC1ccc(cc1)CC(=O)N\N=C\c1ccc(OC(=O)C)cc1</chem>                                                  |
| 59 | SB-15.cdx   | <chem>BrC1ccc(cc1)CC(=O)N\N=C\c1ccc(OC)cc1</chem>                                                       |
| 60 | SB-7.cdx    | <chem>BrC1ccc(cc1)CC(=O)N\N=C\c1ccc(OC=C)cc1</chem>                                                     |
| 61 | SB-2.cdx    | <chem>BrC1ccc(cc1)CC(=O)N\N=C\c1ccc(OCc2ccccc2)cc10</chem>                                              |

|     | mol            | SMILES                                                                                                          |
|-----|----------------|-----------------------------------------------------------------------------------------------------------------|
| 62  | SB-13.cdx      | <chem>Brc1ccc(cc1)CC(=O)N\N=C\c1ccc(cc1)-c1ccccc1</chem>                                                        |
| 63  | SB-9.cdx       | <chem>Brc1ccc(cc1)CC(=O)N\N=C\c1ccc(cc1)C(C)C</chem>                                                            |
| 64  | SB-5.cdx       | <chem>Brc1ccc(cc1)CC(=O)N\N=C\c1ccccc1OCC=C</chem>                                                              |
| 65  | SB-4.cdx       | <chem>Brc1ccc(cc1)CC(=O)N\N=C\c1ccccc1OCC1ccccc1</chem>                                                         |
| 66  | SB-12.cdx      | <chem>Brc1ccc(cc1)CC(=O)N\N=C\c1ccccc1[N+](=O)[O-]</chem>                                                       |
| 67  | SB-16.cdx      | <chem>Brc1ccc(cc1)CC(=O)N\N=C\c1occc1</chem>                                                                    |
| 68  | N-D-3a         | <chem>Brc1ccc(cc1)CN1CCc2c(C1C1OC(=O)c3c1ccc(OC)c3OC)c(OC)c1OC0c1c2</chem>                                      |
| 69  | M-3.cdx        | <chem>Brc1ccc(cc1)Cc1oc(S)nn1</chem>                                                                            |
| 70  | F-14           | <chem>Brc1ccc(cc1)Cn1nnc(c1)CN1CCc2c(C1C1OCc3c1ccc(OC)c3OC)c(OC)c1OC0c1c2</chem>                                |
| 71  | KES-5.cdx      | <chem>Brc1ccccc1C(OCC(=O)c1cc(Cl)c(Cl)cc1)=O</chem>                                                             |
| 72  | KES-7.cdx      | <chem>Brc1ccccc1C(OCC(=O)c1cc2c(cc1)cccc2)=O</chem>                                                             |
| 73  | KES-1.cdx      | <chem>Brc1ccccc1C(OCC(=O)c1ccc(Cl)cc1)=O</chem>                                                                 |
| 74  | KES-4.cdx      | <chem>Brc1ccccc1C(OCC(=O)c1ccc(F)cc1)=O</chem>                                                                  |
| 75  | KES-3.cdx      | <chem>Brc1ccccc1C(OCC(=O)c1ccc(OC)cc1)=O</chem>                                                                 |
| 76  | KES-6.cdx      | <chem>Brc1ccccc1C(OCC(=O)c1ccc([N+](=O)[O-])cc1)=O</chem>                                                       |
| 77  | KES-8.cdx      | <chem>Brc1ccccc1C(OCC(=O)c1ccc(cc1)-c1ccccc1)=O</chem>                                                          |
| 78  | KES-2.cdx      | <chem>Brc1ccccc1C(OCC(=O)c1ccc(cc1)C)=O</chem>                                                                  |
| 79  | MI-84.mol      | <chem>Brc1sc(cc1)/C(=N/NC(=S)N)/C</chem>                                                                        |
| 80  | MI-99.mol      | <chem>Brc1sc(cc1)/C(=N/NC(=S)NC(=O)c1ccccc1)/C</chem>                                                           |
| 81  | MI-90.mol      | <chem>Brc1sc(cc1)/C(=N/NC(=S)NC1CCCC1)/C</chem>                                                                 |
| 82  | MI-86.mol      | <chem>Brc1sc(cc1)/C(=N/NC(=S)Nc1c2c(ccc1)cccc2)/C</chem>                                                        |
| 83  | MI-91.mol      | <chem>Brc1sc(cc1)/C(=N/NC(=S)Nc1cc(Cl)cccc1)/C</chem>                                                           |
| 84  | MI-93.mol      | <chem>Brc1sc(cc1)/C(=N/NC(=S)Nc1ccc(F)cc1)/C</chem>                                                             |
| 85  | MI-83.mol      | <chem>Brc1sc(cc1)/C(=N/NC(=S)Nc1ccc([N+](=O)[O-])cc1)/C</chem>                                                  |
| 86  | MI-100.mol     | <chem>Brc1sc(cc1)/C(=N/NC(=S)Nc1ccc(cc1)CC)/C</chem>                                                            |
| 87  | MI-92.mol      | <chem>Brc1sc(cc1)/C(=N/NC(=S)Nc1ccccc1)/C</chem>                                                                |
| 88  | 10-Cembrene    | <chem>C1CC(=CCCC(=CCC=C(C=CC1C(C)C)C)C)C</chem>                                                                 |
| 89  | 4-Cembrene-A   | <chem>C1CC(=CCCC(=CCC=C(CCC1C(C)=C)C)C)C</chem>                                                                 |
| 90  | 6-Cembrene-C   | <chem>C1CC(=CCCC(=CCCC(=CC=C1C(C)C)C)C)C</chem>                                                                 |
| 91  | 11-Isocembrene | <chem>C1CC(=CCCC(=CCCC(C=CC1C(C)=C)C)C)C</chem>                                                                 |
| 92  | 5-Isocembrene  | <chem>C1CC(=CCCC(=CCCC(C=CC1C(C)C)=C)C)C</chem>                                                                 |
| 93  | 6BA.mol        | <chem>Cl(C/C=C/1\C2=NC3=NN(C(N)C3C=C2(OC\1)NCc1ccccc1)c1ccccc1)=C</chem>                                        |
| 94  | S45            | <chem>Cl[C@@H]1C=C[C@@]([C@@H]12CC[C@@]3(C([C@@]12C)C(=O)C=C1[C@@H]2[C@@H]1C)[C@@H]([C@@H]1CC[C@@]2(CC[C</chem> |
| 95  | 8.cdx          | <chem>Clc1c2c(sc1C(=O)Nc1ccccc1)c1sc(C(=O)Nc3ccccc3)c(Cl)c1cc2</chem>                                           |
| 96  | 2.cdx          | <chem>Clc1c2c(sc1C(Cl)=O)c1sc(C(Cl)=O)c(Cl)c1cc2</chem>                                                         |
| 97  | 3.cdx          | <chem>Clc1c2c(sc1C(OCCCC)=O)c1sc(C(OCCCC)=O)c(Cl)c1cc2</chem>                                                   |
| 98  | N-T-1          | <chem>Clc1ccc(-n2nnc(c2)CN2CCc3c(C2C(OC)c2ccc(OC)c(OC)c2C=O)c(OC)c2OC0c2c3)ccc1C1</chem>                        |
| 99  | F-17.mol       | <chem>Clc1ccc(-n2nnc(c2)CN2CCc3c(C2C2OC4c2ccc(OC)c4OC)c(OC)c2OC0c2c3)ccc1C1</chem>                              |
| 100 | A5D.mol        | <chem>Clc1cc(Cl)cccc1C(N1CCc2c([C@@H]1[C@@H]1OCc3c1ccc(OC)c3OC)c(OC)c1OC0c1c2)C(=O)N</chem>                     |
| 101 | M-8.cdx        | <chem>Clc1cc(Cl)ccc1Cc1oc(S)nn1</chem>                                                                          |
| 102 | TT-6.cdx       | <chem>Clc1cc(F)c(F)cc1C=1Sc2n(N=1)c(nn2)-c1ccncc1</chem>                                                        |
| 103 | FT-8.cdx       | <chem>Clc1cc(F)c(F)cc1C=1Sc2n(N=1)c(nn2)-c1occcc1</chem>                                                        |
| 104 | M-17.cdx       | <chem>Clc1cc(F)c(cc1)-c1oc(S)nn1</chem>                                                                         |
| 105 | NT-1.cdx       | <chem>Clc1cc(F)c(cc1)C=1Sc2n(N=1)c(nn2)-c1cccncc1</chem>                                                        |
| 106 | TT-1.cdx       | <chem>Clc1cc(F)c(cc1)C=1Sc2n(N=1)c(nn2)-c1ccncc1</chem>                                                         |
| 107 | FT-1.cdx       | <chem>Clc1cc(F)c(cc1)C=1Sc2n(N=1)c(nn2)-c1occcc1</chem>                                                         |
| 108 | MI-151.mol     | <chem>Clc1cc(NC(=S)N\N=C(/C)\c2cc(sc2C)C)ccc1</chem>                                                            |
| 109 | MI-31.mol      | <chem>Clc1cc(NC(=S)N\N=C(/C)\c2cc3c(cc2)cccc3)ccc1</chem>                                                       |
| 110 | MI-111.mol     | <chem>Clc1cc(NC(=S)N\N=C(/C)\c2ncnc2C)ccc1</chem>                                                               |
| 111 | MI-131.mol     | <chem>Clc1cc(NC(=S)N\N=C(/C)\c2sc(nc2C)C)ccc1</chem>                                                            |
| 112 | MI-191.mol     | <chem>Clc1cc(NC(=S)N\N=C\2/CCc3cc(OC)c(OC)cc/23)ccc1</chem>                                                     |
| 113 | MI-211.mol     | <chem>Clc1cc(NC(=S)N\N=C\c2ccc([N+](=O)[O-])cc2)ccc1</chem>                                                     |
| 114 | R-NPG-20.cdx   | <chem>Clc1cc(O)cc(Cl)c1C=C(\N1C(=O)c2c(cccc2)C1=O)/C(O)=O</chem>                                                |
| 115 | I-2.cdx        | <chem>Clc1cc(ccc1)C1=Nn2c(SC1)nnc2-c1ccncc1</chem>                                                              |
| 116 | R-NPG-8.cdx    | <chem>Clc1cc(ccc1)\C=C(\N1C(=O)c2c(cccc2)C1=O)/C(O)=O</chem>                                                    |
| 117 | IN-3CB.cdx     | <chem>Clc1cc(ccc1)\C=N/Nc1sc2c(n1)cccc2</chem>                                                                  |
| 118 | 17.cdx         | <chem>Clc1cc(ccc1Cl)-c1c2c(sc1C(OCCCC)=O)c1sc(C(OCCCC)=O)c(c1cc2)-c1cc(Cl)c(Cl)cc1</chem>                       |
| 119 | RXN-8.cdx      | <chem>Clc1cc(ccc1Cl)C1=Nn2c(SC1)nnc2-c1ccc(OC)cc1</chem>                                                        |
| 120 | N-8.cdx        | <chem>Clc1cc(ccc1Cl)C1=Nn2c(SC1)nnc2-c1ccncc1</chem>                                                            |
| 121 | I-8.cdx        | <chem>Clc1cc(ccc1Cl)C1=Nn2c(SC1)nnc2-c1ccncc1</chem>                                                            |
| 122 | F-8.cdx        | <chem>Clc1cc(ccc1Cl)C1=Nn2c(SC1)nnc2-c1occcc1</chem>                                                            |

|     | mol                                   | SMILES                                                                                                     |
|-----|---------------------------------------|------------------------------------------------------------------------------------------------------------|
| 123 | M-5.cdx                               | <chem>Clc1cc(ccc1Cl)Cc1oc(S)nn1</chem>                                                                     |
| 124 | KES-13.cdx                            | <chem>Clc1cc(ccc1F)C(OCC(=O)c1cc(Cl)c(Cl)cc1)=O</chem>                                                     |
| 125 | KES-15.cdx                            | <chem>Clc1cc(ccc1F)C(OCC(=O)c1cc2c(cc1)cccc2)=O</chem>                                                     |
| 126 | KES-10.cdx                            | <chem>Clc1cc(ccc1F)C(OCC(=O)c1ccc(Cl)cc1)=O</chem>                                                         |
| 127 | KES-9.cdx                             | <chem>Clc1cc(ccc1F)C(OCC(=O)c1ccc(F)cc1)=O</chem>                                                          |
| 128 | KES-12.cdx                            | <chem>Clc1cc(ccc1F)C(OCC(=O)c1ccc(OC)cc1)=O</chem>                                                         |
| 129 | KES-14.cdx                            | <chem>Clc1cc(ccc1F)C(OCC(=O)c1ccc([N+](=O)[O-])cc1)=O</chem>                                               |
| 130 | KES-16.cdx                            | <chem>Clc1cc(ccc1F)C(OCC(=O)c1ccc(cc1)-c1cccc1)=O</chem>                                                   |
| 131 | KES-11.cdx                            | <chem>Clc1cc(ccc1F)C(OCC(=O)c1ccc(cc1Cl)C)=O</chem>                                                        |
| 132 | NT-2.cdx                              | <chem>Clc1cc(ccc1F)C=1Sc2n(N=1)c(nn2)-c1cccn1</chem>                                                       |
| 133 | TT-2.cdx                              | <chem>Clc1cc(ccc1F)C=1Sc2n(N=1)c(nn2)-c1ccncc1</chem>                                                      |
| 134 | FT-2.cdx                              | <chem>Clc1cc(ccc1F)C=1Sc2n(N=1)c(nn2)-c1occc1</chem>                                                       |
| 135 | 6CA.mol                               | <chem>Clc1cc2C3=NC4=NN(C(N)C4C=C3C(OC2cc1)NCCc1cccc1)c1cccc1</chem>                                        |
| 136 | 4C.mol                                | <chem>Clc1cc2c(OC=C(C3C4C(OC5C3C(=O)CC5)CCCC4=O)C2=O)cc1</chem>                                            |
| 137 | 4H.mol                                | <chem>Clc1cc2c(OC=C(C3C4C(OC=C3C(=O)CCC)CC(C4=O)(C)C)C2=O)cc1</chem>                                       |
| 138 | Chloroquine.cdx                       | <chem>Clc1cc2nccc(NC(CCN(CC)CC)C)c2cc1</chem>                                                              |
| 139 | MI-181.mol                            | <chem>Clc1ccc(NC(=S)N\N=C\2/CCc3cc(OC)c(OC)cc/23)cc1</chem>                                                |
| 140 | MI-201.mol                            | <chem>Clc1ccc(NC(=S)N\N=C\2ccc([N+](=O)[O-])cc2)cc1</chem>                                                 |
| 141 | 7D.mol                                | <chem>Clc1ccc(NC2Oc3c(C4=NC(N=Nc5cccc5)C(C=C24)C#N)cccc3)cc1</chem>                                        |
| 142 | 25.cdx                                | <chem>Clc1ccc(cc1)-c1c2c(sc1C(OCCCC)=O)c1sc(C(OCCCC)=O)c(c1cc2)-c1ccc(Cl)cc1</chem>                        |
| 143 | RXN-2.cdx                             | <chem>Clc1ccc(cc1)C1=Nn2c(SC1)nnc2-c1ccc(OC)cc1</chem>                                                     |
| 144 | N-2.cdx                               | <chem>Clc1ccc(cc1)C1=Nn2c(SC1)nnc2-c1cccn1</chem>                                                          |
| 145 | F-2.cdx                               | <chem>Clc1ccc(cc1)C1=Nn2c(SC1)nnc2-c1occc1</chem>                                                          |
| 146 | M-10.cdx                              | <chem>Clc1ccc(cc1)Cc1oc(S)nn1</chem>                                                                       |
| 147 | R-NPG-13.cdx                          | <chem>Clc1ccc(cc1)\C=C(\N1C(=O)c2c(ccccc2)C1=O)/C(O)=O</chem>                                              |
| 148 | IN-4-CB.cdx                           | <chem>Clc1ccc(cc1)\C=N/Nc1sc2c(n1)cccc2</chem>                                                             |
| 149 | F-13                                  | <chem>Clc1cccc(Cl)c1-n1nnc(c1)CN1CCc2c(C1C10Cc3c1ccc(OC)c3OC)c(OC)c10C0c1c2</chem>                         |
| 150 | M-16.cdx                              | <chem>Clc1cccc(Cl)c1Cc1oc(S)nn1</chem>                                                                     |
| 151 | S-4.mol                               | <chem>Clc1cccc1C(N1CCc2c([C@@H]1[C@H]10Cc3c1ccc(OC)c3OC)c(OC)c10C0c1c2)C#N</chem>                          |
| 152 | A4D.mol                               | <chem>Clc1cccc1C(N1CCc2c([C@@H]1[C@H]10Cc3c1ccc(OC)c3OC)c(OC)c10C0c1c2)C(=O)N</chem>                       |
| 153 | A4U.mol                               | <chem>Clc1cccc1C(N1CCc2c([C@@H]1[C@H]10Cc3c1ccc(OC)c3OC)c(OC)c10C0c1c2)C(=O)N</chem>                       |
| 154 | MI-36.mol                             | <chem>Clc1cccc1CNC(=S)N\N=C(/C)c1ccc2c(cc1)cccc2</chem>                                                    |
| 155 | M-11.cdx                              | <chem>Clc1cccc1Cc1oc(S)nn1</chem>                                                                          |
| 156 | R-NPG-22.cdx                          | <chem>Clc1cccc1\C=C(\N1C(=O)c2c(ccccc2)C1=O)/C(O)=O</chem>                                                 |
| 157 | 6EA.mol                               | <chem>Fc1cc2C3=NC4=NN(C(N)C4C=C3C(OC2cc1)NCCc1cccc1)c1cccc1</chem>                                         |
| 158 | 6FA.mol                               | <chem>Fc1cc2C3=NC4=NN(C(N)C4C=C3C(OC2cc1)NCCc1cccc1)c1cccc1</chem>                                         |
| 159 | 4F.mol                                | <chem>Fc1cc2c(OC=C(C3C4C(OC5C3C(=O)CC(C5)(C)C)CC(C4=O)(C)C)C2=O)cc1</chem>                                 |
| 160 | 4E.mol                                | <chem>Fc1cc2c(OC=C(C3C4C(OC5C3C(=O)CC(C5)CCCC4=O)C2=O)cc1</chem>                                           |
| 161 | F-8                                   | <chem>Fc1cccc(-n2nnc(c2)CN2Cc3c(C2C20Cc4c2ccc(OC)c4OC)c(OC)c20C0c2c3)cc1</chem>                            |
| 162 | 6HA.mol                               | <chem>Fc1ccc(N2N=C3N=C4C(=CC3C2N)C(OC2c4cccc2)NC2CCCC2)cc1</chem>                                          |
| 163 | 6IA.mol                               | <chem>Fc1ccc(N2N=C3N=C4C(=CC3C2N)C(OC2c4cccc2)NC2cccc2)cc1</chem>                                          |
| 164 | N-D-12b                               | <chem>Fc1ccc(cc1)C(CN1CCc2c(C1C10C(=O)c3c1ccc(OC)c3OC)c(OC)c10C0c1c2)c1ccc(F)cc1</chem>                    |
| 165 | N-D-12a                               | <chem>Fc1ccc(cc1)C(CN1CCc2c(C1C10C(=O)c3c1ccc(OC)c3OC)c(OC)c10C0c1c2)c1ccc(F)cc1</chem>                    |
| 166 | S-5.mol                               | <chem>Fc1cccc(cc1)C(N1CCc2c([C@@H]1[C@H]10Cc3c1ccc(OC)c3OC)c(OC)c10C0c1c2)C#N</chem>                       |
| 167 | S-6D.mol                              | <chem>Fc1ccc(cc1)C(N1CCc2c([C@@H]1[C@H]10Cc3c1ccc(OC)c3OC)c(OC)c10C0c1c2)C#N</chem>                        |
| 168 | A6D.mol                               | <chem>Fc1ccc(cc1)C(N1CCc2c([C@@H]1[C@H]10Cc3c1ccc(OC)c3OC)c(OC)c10C0c1c2)C(=O)N</chem>                     |
| 169 | A6U.mol                               | <chem>Fc1ccc(cc1)C(N1CCc2c([C@@H]1[C@H]10Cc3c1ccc(OC)c3OC)c(OC)c10C0c1c2)C(=O)N</chem>                     |
| 170 | AM6.mol                               | <chem>Fc1ccc(cc1)C(N1CCc2c([C@@H]1[C@H]10Cc3c1ccc(OC)c3OC)c(OC)c10C0c1c2)CN</chem>                         |
| 171 | N-D-27a                               | <chem>Fc1ccc(cc1)CN1CCc2c(C1C10C(=O)c3c1ccc(OC)c3OC)c(OC)c10C0c1c2</chem>                                  |
| 172 | N-T-3                                 | <chem>Fc1ccc(cc1)Cn1nnc(c1)CN1CCc2c(C1C10C(=O)c3c1ccc(OC)c3OC)c(OC)c10C0c1c2</chem>                        |
| 173 | F-2                                   | <chem>Fc1ccc(cc1)Cn1nnc(c1)CN1CCc2c(C1C10Cc3c1ccc(OC)c3OC)c(OC)c10C0c1c2</chem>                            |
| 174 | Favipiravir                           | <chem>Fc1nc(C(=O)N)c(O)nc1</chem>                                                                          |
| 175 | S37                                   | <chem>I[C@@H]1[C@H]([C@@H]2CC[C@@H]3(C([C@@H]2C([C@H]10C(=O)C)C)C(=O)C=C1[C@@H]2[C@@H]1(C)[C@H]1(CC</chem> |
| 176 | N11.mol                               | <chem>N(=C(/N)\c1cccc1)/c1cccc1CCC</chem>                                                                  |
| 177 | 16-Duva-3,9,13-triene-1,5-?-diol      | <chem>O(C(=O)C)C1(CC=CC(O)(CCC=C(CCC(C=C1)C(C)C)C)C)C</chem>                                               |
| 178 | 39-3-O-acetyl-9,11-dehydro-b- boswell | <chem>O(C(=O)C)C1CCC2(C(CCC3(C2=CC=C2C4C(C)C(CCC4(CCC23C)C)C)C)C1(C(O)=O)C)C</chem>                        |
| 179 | 41-3-O-acetyl-9,11-dehydro-?- boswell | <chem>O(C(=O)C)C1CCC2(C(CCC3(C2=CC=C2C4C(CCC4(CCC23C)C)C)C)C)C1(C(O)=O)C)C</chem>                          |
| 180 | 30-3-?-acetyl-b-Boswellic acid        | <chem>O(C(=O)C)C1CCC2(C(CCC3(C2CC=C2C4C(C)C(CCC4(CCC23C)C)C)C)C1(C(O)=O)C)C</chem>                         |
| 181 | 33-3- ? -acetyl-?-Boswellic acid      | <chem>O(C(=O)C)C1CCC2(C(CCC3(C2CC=C2C4C(CCC4(CCC23C)C)C)C)C)C1(C(O)=O)C)C</chem>                           |
| 182 | 31-3-?-acetyl-11-keto-b-Boswellic aci | <chem>O(C(=O)C)C1CCC2(C3C(CCC2C1(C(O)=O)C)C)C1(C(C2C(C)C(CCC2(CC1)C)C)=CC3=O)C)C</chem>                    |
| 183 | 43-3-acetyl-11-hydroxy-12-ene-24-oic  | <chem>O(C(=O)C)C1CCC2(C3C(CCC2C1(C(O)=O)C)C)C1(C(C2C(C)C(CCC2(CC1)C)C)=CC3O)C)C</chem>                     |

|     | mol                                   | SMILES                                                                                                      |
|-----|---------------------------------------|-------------------------------------------------------------------------------------------------------------|
| 184 | 42-3a-acetoxyurs-5:12-dien-24-oic aci | <chem>O(C(=O)C)C1CCC2(C3CC=C4C5C(C)C(CCC5(CCC4(C)C3(CC=C2C1(C(=O)C)C)C)C</chem>                             |
| 185 | 3a-acetoxyurs-5:12-dien-24-oic acid   | <chem>O(C(=O)C)[C@H]1CC[C@H]2(C3CC=C4C5[C@H](C)[C@H]1(CC[C@H]5(CC[C@H]4(C)[C@H]3(CC=C2[C@H]1(C</chem>       |
| 186 | 3-O-acetyl-9,11-dehydro-b-Boswellic a | <chem>O(C(=O)C)[C@H]1CC[C@H]2(C(C(C[C@H]3(C2C=CC=C2C4[C@H](C)[C@H]1(CC[C@H]4(CC[C@H]23C)C)C)C)[C@H</chem>   |
| 187 | Alfa-Amyrin Acetae.mol                | <chem>O(C(=O)C)[C@H]1CC[C@H]2(C(C(C[C@H]3(C2C=CC2[C@H]4[C@H](C)[C@H]1(CC[C@H]4(CC[C@H]23C)C)C)C</chem>      |
| 188 | Acetyl-Boswellic acid-b-ABA           | <chem>O(C(=O)C)[C@H]1CC[C@H]2(C(C(C[C@H]3(C2CC=C2C4[C@H](C)[C@H]1(CC[C@H]4(CC[C@H]23C)C)C)C)[C@H</chem>     |
| 189 | DCM100.mol                            | <chem>O(C(=O)C)[C@H]1CC[C@H]2(C(C(C[C@H]3(C2CC=C2C4[C@H](C)[C@H]1(CC[C@H]4(CC[C@H]23C)C)C)C)[C@H</chem>     |
| 190 | 3a-acetoxyup-12:20(29)-dien-24-oic a  | <chem>O(C(=O)C)[C@H]1CC[C@H]2(C(C(C[C@H]3(C2CC=C2C4[C@H]1(CC[C@H]4(CC[C@H]23C)C)C)C)C)[C@H]1(C(=O</chem>    |
| 191 | a-ABA                                 | <chem>O(C(=O)C)[C@H]1CC[C@H]2(C(C(C[C@H]3(C2CC=C2[C@H]4CC(CC[C@H]4(CC[C@H]23C)C)C)C)C)[C@H]1(C(=O</chem>    |
| 192 | BETA-amyrine acetate                  | <chem>O(C(=O)C)[C@H]1CC[C@H]2(C(C(C[C@H]3(C2CC=C2C4[C@H](C)[C@H]1(CC[C@H]4(CC[C@H]23C)C)C)C)C1(C</chem>     |
| 193 | β-amyrine acetate.mol                 | <chem>O(C(=O)C)[C@H]1CC[C@H]2(C(C(C[C@H]3(C2CC=C2C4[C@H](C)[C@H]1(CC[C@H]4(CC[C@H]23C)C)C)C)C1(C</chem>     |
| 194 | 3-epi-a-ABA                           | <chem>O(C(=O)C)[C@H]1CC[C@H]2(C(C(C[C@H]3(C2CC=C2[C@H]4CC(CC[C@H]4(CC[C@H]23C)C)C)C)C)[C@H]1(C(=O</chem>    |
| 195 | 3-epi-b-ABA                           | <chem>O(C(=O)C)[C@H]1CC[C@H]2(C(C(C[C@H]3(C2CC=C2[C@H]4[C@H](C)[C@H]1(CC[C@H]4(CC[C@H]23C)C)C)C</chem>      |
| 196 | 3a-Acetoxyup-12-20(29).mol            | <chem>O(C(=O)CC(=O)C)[C@H]1CC[C@H]2(C(C(C[C@H]3(C2CC=C2C4(C(C[C@H]23C)CC[C@H]4C(=O)C)C)[C@H]1(C(=O)=</chem> |
| 197 | SF-10-2                               | <chem>O(C(=O)CCCCCCCCCCCCCCCCC)CCC</chem>                                                                   |
| 198 | Oseltamivir                           | <chem>O(C(C(C)CC)C1C=C(C(C(N)C1NC(=O)C)C(=O)CC)=O</chem>                                                    |
| 199 | AJAOMD2                               | <chem>O(C)C1=CC(=O)C(OC)=CC1=O</chem>                                                                       |
| 200 | AJAOMD1                               | <chem>O(C)C1=CC(=O)C=C(OC)C1=O</chem>                                                                       |
| 201 | 36-11-?-methoxy-b-boswellic acid      | <chem>O(C)C1C2C(CCC3C(C(=O)=O)C)C(C(=O)CCC23C)(C)C2(C(C3C(C)C(CCC3(CC2)C)C)=C1)C</chem>                     |
| 202 | BEMD-12                               | <chem>O(C)C1[C@H](O)[C@H](O)[C@H](O)[C@H]1O</chem>                                                          |
| 203 | Quebratichol.mol                      | <chem>O(C)C1[C@H](O)[C@H](O)[C@H](O)[C@H]1O</chem>                                                          |
| 204 | U-16.mol                              | <chem>O(C)c1cc(N(C(C(=O)NC(C)(C)c2ccc(OC)cc2)C(=O)CCC(=O)N2CCC(N(C(=O)CC)c3cccc3)(CC2)COC)cc</chem>         |
| 205 | R-NPG-2.cdx                           | <chem>O(C)c1cc(ccc1O)\C=C(\N1C(=O)c2c(cccc2)C1=O)/C(O)=O</chem>                                             |
| 206 | U-13.mol                              | <chem>O(C)c1cc(ccc1OC)C(N(C(=O)CCC(=O)N1CCC(N(C(=O)CC)c2cccc2)(CC1)COC)c1cc(OC)c(OC)c1)C(=O)N</chem>        |
| 207 | R-NPG-15.cdx                          | <chem>O(C)c1cc(ccc1OC)\C=C(\N1C(=O)c2c(cccc2)C1=O)/C(O)=O</chem>                                            |
| 208 | R-NPG-4.cdx                           | <chem>O(C)c1ccc(OC)cc1\C=C(\N1C(=O)c2c(cccc2)C1=O)/C(O)=O</chem>                                            |
| 209 | SBEH-17                               | <chem>O(C)c1ccc(cc1)C=O</chem>                                                                              |
| 210 | R-NPG-19.cdx                          | <chem>O(C)c1ccc(cc1)\C=C(\N1C(=O)c2c(cccc2)C1=O)/C(O)=O</chem>                                              |
| 211 | R-NPG-25.cdx                          | <chem>O(C)c1cccc(C)c1\C=C(\N1C(=O)c2c(cccc2)C1=O)/C(O)=O</chem>                                             |
| 212 | R-NPG-10.cdx                          | <chem>O(C)c1cccc1\C=C(\N1C(=O)c2c(cccc2)C1=O)/C(O)=O</chem>                                                 |
| 213 | R-NPG-26.cdx                          | <chem>O(C)c1cccc1\C=C(\N1C(=O)c2c(cccc2)C1=O)/C(O)=O</chem>                                                 |
| 214 | Lopinavir                             | <chem>O(CC(=O)NC(Cc1cccc1)C(O)CC(NC(=O)C(N1CCNC1=O)C(C)C)Cc1cccc1)c1c(cccc1C)C</chem>                       |
| 215 | 37-11-?-ethoxy-b-boswellic acid       | <chem>O(CC)C1C2C(CCC3C(C(=O)=O)C)C(C(=O)CCC23C)(C)C2(C(C3C(C)C(CCC3(CC2)C)C)=C1)C</chem>                    |
| 216 | 11a-Ethoxy-β-boswellic Acid.mol       | <chem>O(CC)[C@H]1C2[C@H](CCC3C[C@H](C1O)=O)[C@H](O)CC[C@H]23C)(C)[C@H]2(C(C3[C@H](C)[C@H]1(CC[C@H</chem>    |
| 217 | U-6.mol                               | <chem>O(CC1(N(C(=O)CC)c2cccc2)CCN(CC1)C(=O)CCC(=O)N(C(C(=O)NC(C)(C)C)c1cccc1)c1cccc1)C</chem>               |
| 218 | U-14.mol                              | <chem>O(CC1(N(C(=O)CC)c2cccc2)CCN(CC1)C(=O)CCC(=O)N(C(C(C(C)C)C(=O)NC1CCCC1)c1ccc(cc1)C)C</chem>            |
| 219 | U-5.mol                               | <chem>O(CC1(N(C(=O)CC)c2cccc2)CCN(CC1)C(=O)CCC(=O)N(Cc1cccc1)C(C(C(C)C)C(=O)NC(C)(C)C)C</chem>              |
| 220 | U-15.mol                              | <chem>O(CC1(N(C(=O)CC)c2cccc2)CCN(CC1)C(=O)CCC(=O)N(Cc1cccc1)C(C(C(C)C)C(=O)NC(C)(C)C)C</chem>              |
| 221 | U-17.mol                              | <chem>O(CC1(N(C(=O)CC)c2cccc2)CCN(CC1)C(=O)CCC(=O)N(Cc1cccc1)C(C(C)C(=O)NC(C)(C)C)C</chem>                  |
| 222 | 5.cdx                                 | <chem>O(C\C=C(\C)/C)C=1c2c(NC(=O)C=1CC(O)C(C)=C)cccc2</chem>                                                |
| 223 | 10.cdx                                | <chem>O(C\C=C(\C)/C)C=1c2c(NC(=O)C=1C\C=C(\C)/C)cccc2</chem>                                                |
| 224 | SBME-P5                               | <chem>O1C(C(C)C(O)C(O)C1COC(=O)\C=C\c1ccc(O)cc1)c1c(c2c(OC(=CC2=O)CC(=O)C)cc10)C</chem>                     |
| 225 | SBME-P3                               | <chem>O1C(C(C)C(O)C(O)C1COC(=O)\C=C\c1ccc(O)cc1)c1c(c2c(OC(=CC2=O)CC(=O)C)cc10C)C</chem>                    |
| 226 | S5-5                                  | <chem>O1C(C(C)C(O)C(O)C1COC(=O)\C=C\c1ccc(O)cc1)c1c2OC(=CC(=O)c2c(cc10)C)CC(=O)C</chem>                     |
| 227 | QTME-16                               | <chem>O1C(C)C(C)C(O)C(O)C10Cc1cc(O)c2c(c1)C(=O)c1c(c2=O)c(O)cc(O)c1</chem>                                  |
| 228 | SBEH-60                               | <chem>O1C(C)C(C)C(O)C(O)C10Cc1cc(O)c2c(c1)C(=O)c1c(c2=O)c(O)cc(O)c1</chem>                                  |
| 229 | 14.cdx                                | <chem>O1C(CCC(OC(=O)C)C(OC(=O)C)(C)C)(C)C1C0c1ccc(cc1)CCNC(=O)c1cccc1</chem>                                |
| 230 | 13.cdx                                | <chem>O1C(CCC(OC(=O)C)C(OC(=O)C)(C)C)(C)C10c1ccc(cc1)CCNC(=O)\C=C(/C)\C)\C</chem>                           |
| 231 | QTME-14                               | <chem>O1C(CO)C(C)C(O)C(O)C10Cc1c2c(cc(O)c1)C(=O)c1c(c2=O)c(O)cc(c1)CO</chem>                                |
| 232 | QTME-12                               | <chem>O1C(CO)C(C)C(O)C(O)C10c1c2c(cc(O)c1)C(=O)c1c(c2=O)c(O)cc(c1)C</chem>                                  |
| 233 | QTEM-10                               | <chem>O1C(CO)C(C)C(O)C(OC(=O)c2cc(O)c(O)c(O)c2)C10C(=O)\C=C\c1cc(O)c(O)c(O)cc1</chem>                       |
| 234 | N-D-1a                                | <chem>O1C(c2c(c(OC)c(OC)cc2)C1=O)C1N(CCc2c1c(OC)c10C0c1c2)CC1CC1</chem>                                     |
| 235 | N-D-25a                               | <chem>O1C(c2c(c(OC)c(OC)cc2)C1=O)C1N(CCc2c1c(OC)c10C0c1c2)CCCC</chem>                                       |
| 236 | N-D-19a                               | <chem>O1C(c2c(c(OC)c(OC)cc2)C1=O)C1N(CCc2c1c(OC)c10C0c1c2)CCOCCOCCCC</chem>                                 |
| 237 | N-D-15a                               | <chem>O1C(c2c(c(OC)c(OC)cc2)C1=O)C1N(CCc2c1c(OC)c10C0c1c2)CC0c1cccc1</chem>                                 |
| 238 | N-D-18a                               | <chem>O1C(c2c(c(OC)c(OC)cc2)C1=O)C1N(CCc2c1c(OC)c10C0c1c2)Cc1c2OC0c2ccc1</chem>                             |
| 239 | N-D-11a                               | <chem>O1C(c2c(c(OC)c(OC)cc2)C1=O)C1N(CCc2c1c(OC)c10C0c1c2)Cc1c2c(cc3c1cccc3)cccc2</chem>                    |
| 240 | N-D-24a                               | <chem>O1C(c2c(c(OC)c(OC)cc2)C1=O)C1N(CCc2c1c(OC)c10C0c1c2)Cc1ccc(OC)cc1</chem>                              |
| 241 | N-D-10a                               | <chem>O1C(c2c(c(OC)c(OC)cc2)C1=O)C1N(CCc2c1c(OC)c10C0c1c2)Cc1ccc(cc1)C(C)(C)C</chem>                        |
| 242 | N-T-7                                 | <chem>O1C(c2c(c(OC)c(OC)cc2)C1=O)C1N(CCc2c1c(OC)c10C0c1c2)Cc1nnn(c1)CC(O)CC</chem>                          |
| 243 | N-T-6                                 | <chem>O1C(c2c(c(OC)c(OC)cc2)C1=O)C1N(CCc2c1c(OC)c10C0c1c2)Cc1nnn(c1)CC(O)COC=C</chem>                       |
| 244 | N-T-5                                 | <chem>O1C(c2c(c(OC)c(OC)cc2)C1=O)C1N(CCc2c1c(OC)c10C0c1c2)Cc1nnn(c1)CC(O)COC=CC</chem>                      |

|     | mol                                   | SMILES                                                                                                       |
|-----|---------------------------------------|--------------------------------------------------------------------------------------------------------------|
| 245 | N-T-4                                 | <chem>O1C(c2c(c(OC)c(OC)c2)C1=O)C1N(CCC2c1c(OC)c1OC0c1c2)Cc1nnn(c1)CC(O)c1cccc1</chem>                       |
| 246 | 6DA.mol                               | <chem>O1C/C(C2=NC3=NN(C(N)C3C=C2C1NC1CCCC1)c1cccc1)=C\C=C</chem>                                             |
| 247 | 3.cdx                                 | <chem>O1C2(C1C(C(0)(C)C)C\C=C(C(\C)/C)C(=O)c1c(NC2=O)cccc1</chem>                                            |
| 248 | 19-Boscartin-C                        | <chem>O1C2(CCC1(C1OC(CC1)(C)C(O)CC(=O)C(=CC2)C)C(C)C</chem>                                                  |
| 249 | 18-Boscartin-B                        | <chem>O1C2(CCC1(C1OC(CC1)(C)C(O)CC1OC1(CC2)C)C(C)C</chem>                                                    |
| 250 | 9-Isoincensole-Oxide                  | <chem>O1C2(CCC1(C1OC(CC1)(C)C(O)CCC(=CC2)C)C(C)C</chem>                                                      |
| 251 | 26-Incensfuran                        | <chem>O1C2(CCC1(C1OC(CC1)(CCC(=CC2)C)C)C(C)C</chem>                                                          |
| 252 | 17-Boscartin-A                        | <chem>O1C2(CCC1(CC(O)C1(OC(CC1)C(=CCC2O)C)C(C)C)C</chem>                                                     |
| 253 | 22-Boscartin-F                        | <chem>O1C2(CCC1(CC1OC1(CC(O)C=C(C)C)C(=O)CC2O)C)C(C)C</chem>                                                 |
| 254 | 20--Boscartin-D                       | <chem>O1C2(CCC1(CC1OC1(CC(O)C=C(CCC2O)C)C(C)C)C</chem>                                                       |
| 255 | 23-Boscartin-G                        | <chem>O1C2(CCC1(CC1OC1(CCC=C(C)C)C(=O)CC2O)C)C(C)C</chem>                                                    |
| 256 | 24-Boscartin-H                        | <chem>O1C2(CCC1(CC1OC1(CCC=C(C)C)C(=O)CC2O)C)C(C)C</chem>                                                    |
| 257 | 7-Incensole-Oxide                     | <chem>O1C2(CCC1(CC1OC1(CCC=C(CCC2O)C)C(C)C)C</chem>                                                          |
| 258 | 8-Incensole-Oxide-Acetate             | <chem>O1C2(CCC1(CC1OC1(CCC=C(CCC2OC(=O)C)C)C(C)C)C</chem>                                                    |
| 259 | 21-Boscartin-E                        | <chem>O1C2(CCC1(CC1OC1(CCC=C(OC)CCC2O)C)C(C)C</chem>                                                         |
| 260 | 27-Isoincensolol                      | <chem>O1C2(CCC1(CC=C(CCC(O)C(O)(CCC2O)C)C(C)C)C</chem>                                                       |
| 261 | 2-Incensole                           | <chem>O1C2(CCC1(CCC(=CCCC(=CCC2O)C)C(C)C)C</chem>                                                            |
| 262 | 3-Incensole Acetate                   | <chem>O1C2(CCC1(CCC(=CCCC(=CCC2OC(=O)C)C)C(C)C)C</chem>                                                      |
| 263 | 4.cdx                                 | <chem>O1C2=C(C=C(C1(C)C)C(=O)Nc1c2cccc1</chem>                                                               |
| 264 | 4B.mol                                | <chem>O1C2C(C(C3C1CC(CC3=O)(C)C)C1=C0c3c(cccc3)C1=O)C(=O)CC(C2)(C)C</chem>                                   |
| 265 | 4A.mol                                | <chem>O1C2C(C(C3C1CCCC3=O)C1=C0c3c(cccc3)C1=O)C(=O)CCC2</chem>                                               |
| 266 | 14-Duva-3-9-13-triene-1-?-hydroxy-5-8 | <chem>O1C2CCCC1(C=CCC(OC(=O)C)C=C(C(C=C2C)C(C)C)C</chem>                                                     |
| 267 | S64                                   | <chem>O1C[C@@]12CC[C@]11([C@@H]1(CC[C@@H]3(C1C(=O)C=C1[C@@H]4[C@@H]1(C)[C@@H]1(CC[C@@]4(CC[C@]13C)C)C</chem> |
| 268 | F-18.mol                              | <chem>O1Cc2c(ccc(OC)c2OC)C1C1N(CCc2c1c(OC)c1OC0c1c2)Cc1nnn(c1)-c1cc(OC)c(OC)cc1</chem>                       |
| 269 | F-4.mol                               | <chem>O1Cc2c(ccc(OC)c2OC)C1C1N(CCc2c1c(OC)c1OC0c1c2)Cc1nnn(c1)-c1ccc(OC)cc1</chem>                           |
| 270 | F-3.mol                               | <chem>O1Cc2c(ccc(OC)c2OC)C1C1N(CCc2c1c(OC)c1OC0c1c2)Cc1nnn(c1)-c1ccc(cc1)C</chem>                            |
| 271 | F-11.mol                              | <chem>O1Cc2c(ccc(OC)c2OC)C1C1N(CCc2c1c(OC)c1OC0c1c2)Cc1nnn(c1)-c1ccc(cc1)CC</chem>                           |
| 272 | F-9                                   | <chem>O1Cc2c(ccc(OC)c2OC)C1C1N(CCc2c1c(OC)c1OC0c1c2)Cc1nnn(c1)-c1cccc1</chem>                                |
| 273 | F-23.mol                              | <chem>O1Cc2c(ccc(OC)c2OC)C1C1N(CCc2c1c(OC)c1OC0c1c2)Cc1nnn(c1)CC(O)C</chem>                                  |
| 274 | F-16.mol                              | <chem>O1Cc2c(ccc(OC)c2OC)C1C1N(CCc2c1c(OC)c1OC0c1c2)Cc1nnn(c1)CC(O)CC</chem>                                 |
| 275 | F-22.mol                              | <chem>O1Cc2c(ccc(OC)c2OC)C1C1N(CCc2c1c(OC)c1OC0c1c2)Cc1nnn(c1)CC(O)COC(C)C</chem>                            |
| 276 | F-15.mol                              | <chem>O1Cc2c(ccc(OC)c2OC)C1C1N(CCc2c1c(OC)c1OC0c1c2)Cc1nnn(c1)CC(O)COC=C</chem>                              |
| 277 | F-19.mol                              | <chem>O1Cc2c(ccc(OC)c2OC)C1C1N(CCc2c1c(OC)c1OC0c1c2)Cc1nnn(c1)CC(O)COC(C)C</chem>                            |
| 278 | F-21.mol                              | <chem>O1Cc2c(ccc(OC)c2OC)C1C1N(CCc2c1c(OC)c1OC0c1c2)Cc1nnn(c1)CC(O)C0c1cccc1</chem>                          |
| 279 | F-6.mol                               | <chem>O1Cc2c(ccc(OC)c2OC)C1C1N(CCc2c1c(OC)c1OC0c1c2)Cc1nnn(c1)CC(O)c1cccc1</chem>                            |
| 280 | F-7.mol                               | <chem>O1Cc2c(ccc(OC)c2OC)C1C1N(CCc2c1c(OC)c1OC0c1c2)Cc1nnn(c1)Cc1ccc(cc1)C</chem>                            |
| 281 | F-1.mol                               | <chem>O1Cc2c(ccc(OC)c2OC)C1C1N(CCc2c1c(OC)c1OC0c1c2)Cc1nnn(c1)Cc1cccc1</chem>                                |
| 282 | S-3.mol                               | <chem>O1Cc2c(ccc(OC)c2OC)[C@H]1[C@@H]1N(CCc2c1c(OC)c1OC0c1c2)C(C#N)c1cc(OC)c(OC)cc1</chem>                   |
| 283 | S-12.mol                              | <chem>O1Cc2c(ccc(OC)c2OC)[C@H]1[C@@H]1N(CCc2c1c(OC)c1OC0c1c2)C(C#N)c1cc2Cc3c(-c2cc1)cccc3</chem>             |
| 284 | S-12U.mol                             | <chem>O1Cc2c(ccc(OC)c2OC)[C@H]1[C@@H]1N(CCc2c1c(OC)c1OC0c1c2)C(C#N)c1cc2Cc3c(-c2cc1)cccc3</chem>             |
| 285 | S-7.mol                               | <chem>O1Cc2c(ccc(OC)c2OC)[C@H]1[C@@H]1N(CCc2c1c(OC)c1OC0c1c2)C(C#N)c1ccc(OC)cc1OC</chem>                     |
| 286 | S-11.mol                              | <chem>O1Cc2c(ccc(OC)c2OC)[C@H]1[C@@H]1N(CCc2c1c(OC)c1OC0c1c2)C(C#N)c1ccc(OCc2cccc2)cc1</chem>                |
| 287 | S-16.mol                              | <chem>O1Cc2c(ccc(OC)c2OC)[C@H]1[C@@H]1N(CCc2c1c(OC)c1OC0c1c2)C(C#N)c1ccc(cc1)C</chem>                        |
| 288 | S-16U.mol                             | <chem>O1Cc2c(ccc(OC)c2OC)[C@H]1[C@@H]1N(CCc2c1c(OC)c1OC0c1c2)C(C#N)c1ccc(cc1)C</chem>                        |
| 289 | S-9.mol                               | <chem>O1Cc2c(ccc(OC)c2OC)[C@H]1[C@@H]1N(CCc2c1c(OC)c1OC0c1c2)C(C#N)c1ccc(cc1)C(C)C</chem>                    |
| 290 | S-1.mol                               | <chem>O1Cc2c(ccc(OC)c2OC)[C@H]1[C@@H]1N(CCc2c1c(OC)c1OC0c1c2)C(C#N)c1cccc1</chem>                            |
| 291 | S-15.mol                              | <chem>O1Cc2c(ccc(OC)c2OC)[C@H]1[C@@H]1N(CCc2c1c(OC)c1OC0c1c2)C(C#N)c1cccc1O</chem>                           |
| 292 | S-8.mol                               | <chem>O1Cc2c(ccc(OC)c2OC)[C@H]1[C@@H]1N(CCc2c1c(OC)c1OC0c1c2)C(C#N)c1ccnc1</chem>                            |
| 293 | A3D.mol                               | <chem>O1Cc2c(ccc(OC)c2OC)[C@H]1[C@@H]1N(CCc2c1c(OC)c1OC0c1c2)C(C(=O)N)c1cc(OC)c(OC)cc1</chem>                |
| 294 | A3U.mol                               | <chem>O1Cc2c(ccc(OC)c2OC)[C@H]1[C@@H]1N(CCc2c1c(OC)c1OC0c1c2)C(C(=O)N)c1cc(OC)c(OC)cc1</chem>                |
| 295 | A2D.mol                               | <chem>O1Cc2c(ccc(OC)c2OC)[C@H]1[C@@H]1N(CCc2c1c(OC)c1OC0c1c2)C(C(=O)N)c1cc(OCc2cccc2)ccc1</chem>             |
| 296 | A2U.mol                               | <chem>O1Cc2c(ccc(OC)c2OC)[C@H]1[C@@H]1N(CCc2c1c(OC)c1OC0c1c2)C(C(=O)N)c1cc(OCc2cccc2)ccc1</chem>             |
| 297 | A12D.mol                              | <chem>O1Cc2c(ccc(OC)c2OC)[C@H]1[C@@H]1N(CCc2c1c(OC)c1OC0c1c2)C(C(=O)N)c1cc2Cc3c(-c2cc1)cccc3</chem>          |
| 298 | A7D.mol                               | <chem>O1Cc2c(ccc(OC)c2OC)[C@H]1[C@@H]1N(CCc2c1c(OC)c1OC0c1c2)C(C(=O)N)c1ccc(OC)cc1OC</chem>                  |
| 299 | A7U.mol                               | <chem>O1Cc2c(ccc(OC)c2OC)[C@H]1[C@@H]1N(CCc2c1c(OC)c1OC0c1c2)C(C(=O)N)c1ccc(OC)cc1OC</chem>                  |
| 300 | A11D.mol                              | <chem>O1Cc2c(ccc(OC)c2OC)[C@H]1[C@@H]1N(CCc2c1c(OC)c1OC0c1c2)C(C(=O)N)c1ccc(OCc2cccc2)cc1</chem>             |
| 301 | A11U.mol                              | <chem>O1Cc2c(ccc(OC)c2OC)[C@H]1[C@@H]1N(CCc2c1c(OC)c1OC0c1c2)C(C(=O)N)c1ccc(OCc2cccc2)cc1</chem>             |
| 302 | A16D.mol                              | <chem>O1Cc2c(ccc(OC)c2OC)[C@H]1[C@@H]1N(CCc2c1c(OC)c1OC0c1c2)C(C(=O)N)c1ccc(cc1)C</chem>                     |
| 303 | A9.mol                                | <chem>O1Cc2c(ccc(OC)c2OC)[C@H]1[C@@H]1N(CCc2c1c(OC)c1OC0c1c2)C(C(=O)N)c1ccc(cc1)C(C)C</chem>                 |
| 304 | A1D.mol                               | <chem>O1Cc2c(ccc(OC)c2OC)[C@H]1[C@@H]1N(CCc2c1c(OC)c1OC0c1c2)C(C(=O)N)c1cccc1</chem>                         |
| 305 | Untitled Document-1                   | <chem>O1Cc2c(ccc(OC)c2OC)[C@H]1[C@@H]1N(CCc2c1c(OC)c1OC0c1c2)C(C(=O)N)c1cccc1</chem>                         |

|     | m <sub>0</sub> 1      | SMILES                                                                                             |
|-----|-----------------------|----------------------------------------------------------------------------------------------------|
| 306 | ALU.mol               | O1Cc2c(ccc(OC)c2OC)[C@H]1[C@@H]1N(CCc2c1c(OC)c1OC0c1c2)C(C(=O)N)c1ccccc1                           |
| 307 | A8D.mol               | O1Cc2c(ccc(OC)c2OC)[C@H]1[C@@H]1N(CCc2c1c(OC)c1OC0c1c2)C(C(=O)N)c1ccccc1                           |
| 308 | A8U.mol               | O1Cc2c(ccc(OC)c2OC)[C@H]1[C@@H]1N(CCc2c1c(OC)c1OC0c1c2)C(C(=O)N)c1ccccc1                           |
| 309 | S-14.mol              | O1Cc2c(ccc(OC)c2OC)[C@H]1[C@@H]1N(CCc2c1c(OC)c1OC0c1c2)C(C(C)C)C#N                                 |
| 310 | S-17.mol              | O1Cc2c(ccc(OC)c2OC)[C@H]1[C@@H]1N(CCc2c1c(OC)c1OC0c1c2)C(C)C)C#N                                   |
| 311 | AM-12.mol             | O1Cc2c(ccc(OC)c2OC)[C@H]1[C@@H]1N(CCc2c1c(OC)c1OC0c1c2)C(CN)c1cc2Cc3c(-c2cc1)cccc3                 |
| 312 | AM-16.mol             | O1Cc2c(ccc(OC)c2OC)[C@H]1[C@@H]1N(CCc2c1c(OC)c1OC0c1c2)C(CN)c1cccc(c1)C                            |
| 313 | AM1.mol               | O1Cc2c(ccc(OC)c2OC)[C@H]1[C@@H]1N(CCc2c1c(OC)c1OC0c1c2)C(CN)c1ccccc1                               |
| 314 | AM8.mol               | O1Cc2c(ccc(OC)c2OC)[C@H]1[C@@H]1N(CCc2c1c(OC)c1OC0c1c2)C(CN)c1ccccc1                               |
| 315 | S47                   | O1O[C@H]2C=C[C@H](O)[C@@H]1[C@@H]2CC[C@H]4([C@H]1[C@@H]23C)C(=O)C=C1[C@@H]2[C@@H](C)[C@@H](CC[C@H] |
| 316 | SBEH-40               | O1[C@@H](C)c2c(C1=O)c(O)c(O)c2Cc1cc(O)c(C(=O)C)c1O                                                 |
| 317 | JAOET4                | O1[C@@H](O)[C@@H](O)(C)(O)[C@H](OC2=C(OC)c3(C2=O)c(O)c(O)c3)c2ccc(O)c2CO                           |
| 318 | QTEH-14               | O1[C@@H](O)[C@@H](O)(C)(O)[C@H](OC2=C(OC)c3(C2=O)c(O)c(O)c3)c2ccc(O)c2CO                           |
| 319 | SBME-P6               | O1[C@@H](O)[C@@H](O)(C)(O)[C@H](OC2=C(OC)c3(C2=O)c(O)c(O)c3)c2ccc(O)c2CO                           |
| 320 | Desmiflavaside B      | O1[C@@H](O)[C@@H]2C(OC)[C@H](O)[C@@H](OC2C)O[C@H]2CC[C@H]3([C@@H]4C(CC[C@H]3C2)[C@H]2(O)[C@        |
| 321 | Desmiflavaside A      | O1[C@@H](O)[C@@H]2C(OC)[C@H](O)[C@@H](OC2C)O[C@H]2CC[C@H]3([C@@H]4C(CC[C@H]3C2)[C@H]2(O)[C@        |
| 322 | Desmiflavaside D      | O1[C@@H](O)[C@@H]2C(OC)[C@H](O)[C@@H](OC2C)O[C@H]2CC[C@H]3([C@@H]4C(CC[C@H]3C2)[C@H]2(O)[C@        |
| 323 | Desflavasides A       | O1[C@@H](O)[C@@H]2C(OC)[C@H](O)[C@@H](OC2C)O[C@H]2CC[C@H]3([C@@H]4C(CC[C@H]3C2)[C@H]2(O)[C@        |
| 324 | Desflavasides B       | O1[C@@H](O)[C@@H]2C(OC)[C@H](O)[C@@H](OC2C)O[C@H]2CC[C@H]3([C@@H]4C(CC[C@H]3C2)[C@H]2(O)[C@        |
| 325 | Desflavasides C       | O1[C@@H](O)[C@@H]2C(OC)[C@H](O)[C@@H](OC2C)O[C@H]2CC[C@H]3([C@@H]4C(CC[C@H]3C2)[C@H]2(O)[C@        |
| 326 | S78                   | O1[C@@H](O)[C@@H]2CC[C@H]3([C@@H](CC[C@H]4(C3C(=O)C=C3[C@@H]5[C@@H](C)[C@@H](CC[C@H]5(CC[C@        |
| 327 | S76                   | O1[C@@H](O)[C@@H]2CC[C@H]3([C@@H](CC[C@H]4(C3C(=O)C=C3[C@@H]5[C@@H](C)[C@@H](CC[C@H]5(CC[C@        |
| 328 | S77                   | O1[C@@H](O)[C@@H]2CC[C@H]3([C@@H](CC[C@H]4(C3C(=O)C=C3[C@@H]5[C@@H](C)[C@@H](CC[C@H]5(CC[C@        |
| 329 | S74                   | O1[C@@H](O)[C@@H]2CC[C@H]3([C@@H](CC[C@H]4(C3C(=O)C=C3[C@@H]5[C@@H](C)[C@@H](CC[C@H]5(CC[C@        |
| 330 | S75                   | O1[C@@H](O)[C@@H]2CC[C@H]3([C@@H](CC[C@H]4(C3C(=O)C=C3[C@@H]5[C@@H](C)[C@@H](CC[C@H]5(CC[C@        |
| 331 | S79                   | O1[C@@H](O)[C@@H]2CC[C@H]3([C@@H](CC[C@H]4(C3C(=O)C=C3[C@@H]5[C@@H](C)[C@@H](CC[C@H]5(CC[C@        |
| 332 | BEMK-30               | O1[C@@H](O)[C@@H]2C(OC)[C@H](O)[C@@H](OC2CO)OC[C@H](O)[C@H](O)C(OC)C1CO                            |
| 333 | Desflavasides D       | O1[C@@H](O)[C@@H]2C(OC)[C@H](O)[C@@H](OC2CO)OC[C@H](O)[C@@H]3CC[C@H]4([C@@H]5C(CC[C@H]4C3)         |
| 334 | Desmiflavaside C      | O1[C@@H](O)[C@@H]2CC[C@H]3([C@@H]4C(CC[C@H]3C2)[C@H]2(O)CC[C@H](C(OC(=O)c3ccccc3)C)[C@H]2(C        |
| 335 | Nizwaside             | O1[C@@H](O)[C@@H]2CC[C@H]3([C@@H]4C(CC[C@H]3C2)[C@H]2(O)CC[C@H](C(OC(=O)c3ccccc3)C)[C@H]2(C        |
| 336 | NOR.mol               | O1[C@@H](c2c(c(OC)c(O)c2)C1=O)[C@@H]1NCCc2c1c(OC)c1OC0c1c2                                         |
| 337 | QTH-3                 | O1[C@@H]2[C@@H]3[C@@H](CCC3=C)C(CCC2=C)C1=O)=C                                                     |
| 338 | S39                   | O1[C@@H]2[C@@H]1C[C@H]1([C@@H](CC[C@H]3(C1C(=O)C=C1[C@@H]4[C@@H](C)[C@@H](CC[C@H]4(CC[C@H]13       |
| 339 | Incensone             | O1[C@@H]2(CC[C@H]1(C\C=C(\CC\C=C(\CC2=O)/C)/C)C(C)C                                                |
| 340 | Incensone.mol         | O1[C@@H]2(CC[C@H]1(C\C=C(\CC\C=C(\CC2=O)/C)/C)C(C)C                                                |
| 341 | Epi-Incensole         | O1[C@@H]2(CC[C@H]1(C\C=C(\CC\C=C(\CC[C@H]2O)/C)/C)C(C)C                                            |
| 342 | Incensole             | O1[C@@H]2(CC[C@H]1(C\C=C(\CC\C=C(\CC[C@H]2O)/C)/C)C(C)C                                            |
| 343 | Epi-Incensole.mol     | O1[C@@H]2(CC[C@H]1(C\C=C(\CC\C=C(\CC[C@H]2O)/C)/C)C(C)C                                            |
| 344 | Incensole.mol         | O1[C@@H]2(CC[C@H]1(C\C=C(\CC\C=C(\CC[C@H]2O)/C)/C)C(C)C                                            |
| 345 | Incensole acetate     | O1[C@@H]2(CC[C@H]1(C\C=C(\CC\C=C(\CC[C@H]2O)(=O)C)/C)C(C)C                                         |
| 346 | Incensole acetate.mol | O1[C@@H]2(CC[C@H]1(C\C=C(\CC\C=C(\CC[C@H]2O)(=O)C)/C)C(C)C                                         |
| 347 | BEMD-14               | O1[C@H](O)[C@@H]2(O[C@H](CO)C(O)[C@H]2O)CO[C@H](O)[C@H](O)[C@H](O)C1CO                             |
| 348 | BEMD-14.mol           | O1[C@H](O)[C@@H]2(O[C@H](CO)C(O)[C@H]2O)CO[C@H](O)[C@H](O)[C@H](O)C1CO                             |
| 349 | SBME-25               | O1[C@H]([C@H](O)[C@@H](O)[C@H](O)[C@H]1CO)[C@H]1c2c(C(=O)c3c1cccc3O)c(O)c2)CO[C@@H]1O              |
| 350 | QTH-4                 | O1[C@H]2[C@@H](CC\C=C(\CC\C=C(\C2)\C)\C)C(=C)C1=O                                                  |
| 351 | QTH-70                | O1[C@H]2[C@@H](CC[C@H](O)[C@@H]3[C@@H]2[C@H](O)(CC3)C)C(C(=O)C)C1=O                                |
| 352 | S41                   | O1[C@H]2[C@@H]1C[C@H]1([C@@H](CC[C@H]3(C1C(=O)C=C1[C@@H]4[C@@H](C)[C@@H](CC[C@H]4(CC[C@H]13        |
| 353 | 11.cdx                | O1[C@H](CC[C@@H]1C(OC(=O)C)(C)C(C)(O)C0c1ccc(cc1)CCNC(=O)c1ccccc1)C                                |
| 354 | BAEH-30               | O1[C@H]2([C@H](CC[C@H]1OC)[C@H]1([C@@H](CC2)C(C)(C)C(=O)CC1)C)C                                    |
| 355 | JAOETH35              | O1c2c(C(=O)C(O)=C1c1cc(O)c(O)c1)c(O)c(O)c2                                                         |
| 356 | JCDACH90              | O1c2c(C(=O)C(O)=C1c1cc(O)c(O)c1)c(O)c                                                              |

|     | mol                                   | SMILES                                                                                                        |
|-----|---------------------------------------|---------------------------------------------------------------------------------------------------------------|
| 367 | N-D-11b                               | <chem>O1c2c(OC1)cc1c(C(N(CC1)Cc1c3c(cc4c1cccc4)cccc3)C(O)c1ccc(OC)c(OC)c1CO)c2OC</chem>                       |
| 368 | N-D-2b                                | <chem>O1c2c(OC1)cc1c(C(N(CC1)Cc1cccc1)C(O)c1ccc(OC)c(OC)c1CO)c2OC</chem>                                      |
| 369 | S-2.mol                               | <chem>O1c2c(OC1)cc1c([C@@H](N(CC1)C(C#N)c1cc(OC3cccc3)ccc1)[C@@H]1CCc3c1ccc(OC)c3OC)c2OC</chem>               |
| 370 | N-D-18b                               | <chem>O1c2c(OC1)cccc2CNCCc2c(C1C(O)c1ccc(OC)c(OC)c1CO)c(OC)c1OCc1c2</chem>                                    |
| 371 | SBEH-50.mol                           | <chem>O1c2c(c(cc(O)c2)C)C(OC)=CC1=O</chem>                                                                    |
| 372 | 47-amino-KBA.cdx                      | <chem>O=C1C2C(CCC3C(C(O)=O)(C)C(N)CCC23C)(C)C2(C(C3C(C)C(CCC3(CC2)C)C)=C1)C</chem>                            |
| 373 | S97                                   | <chem>O=C1C2[C@@]3(C(C(C[C@]2(C2C(=C1)C1[C@@H](C)[C@@H](CC[C@@]1(CC2)C)C)C)[C@](C(OC(CCCOC(=O)[C@</chem>      |
| 374 | S91                                   | <chem>O=C1C2[C@@]3(C(C(C[C@]2(C2C(=C1)C1[C@@H](C)[C@@H](CC[C@@]1(CC2)C)C)C)[C@](C(OC(CCCOC(=O)[C@</chem>      |
| 375 | S96                                   | <chem>O=C1C2[C@@]3(C(C(C[C@]2(C2C(=C1)C1[C@@H](C)[C@@H](CC[C@@]1(CC2)C)C)C)[C@](C(OC(CCCOC(=O)[C@</chem>      |
| 376 | S90                                   | <chem>O=C1C2[C@@]3(C(C(C[C@]2(C2C(=C1)C1[C@@H](C)[C@@H](CC[C@@]1(CC2)C)C)C)[C@](C(OC(CCCOC(=O)[C@</chem>      |
| 377 | S95                                   | <chem>O=C1C2[C@@]3(C(C(C[C@]2(C2C(=C1)C1[C@@H](C)[C@@H](CC[C@@]1(CC2)C)C)C)[C@](C(OC(COC(=O)[C@</chem>        |
| 378 | S89                                   | <chem>O=C1C2[C@@]3(C(C(C[C@]2(C2C(=C1)C1[C@@H](C)[C@@H](CC[C@@]1(CC2)C)C)C)[C@](C(OC(COC(=O)[C@</chem>        |
| 379 | SF-14                                 | <chem>O=C1C2[C@]1(CCC3[C@@]2(C[C[C@H](O)C3(C)C)C)(C)[C@]2(C(=C1)C1[C@@H](C)[C@@H](CC[C@@]1(CC2)C</chem>       |
| 380 | 3-beta-hydroxy-11-oxours-12ene.mol    | <chem>O=C1C2[C@]1(CCC3[C@@]2(C[C[C@H](O)C3(C)C)C)(C)[C@]2(C(=C1)C1[C@@H](C)[C@@H](CC[C@@]1(CC2)C</chem>       |
| 381 | PDCM-55-3-hydroxy-20(29)-lupene-11-on | <chem>O=C1C2[C@]1(CCC3[C@@]2(C[C[C@H](O)C3(C)C)C)(C)[C@]2(C(C1)C1[C@@]1(CC2)(CC[C@H]1C(C)=C)C)C</chem>        |
| 382 | 3-hydroxy-20(29)-lupene-11-one.mol    | <chem>O=C1C2[C@]1(CCC3[C@@]2(C[C[C@H](O)C3(C)C)C)(C)[C@]2(C(C1)C1[C@@]1(CC2)(CC[C@H]1C(C)=C)C)C</chem>        |
| 383 | S20                                   | <chem>O=C1C2[C@]1(CCC3[C@@]2(Cc2nc4c(nc2[C@H]3C)cccc4)C)(C)[C@]2(CC[C@@]3([C@H](C2=C1)[C@@H](C)</chem>        |
| 384 | S21                                   | <chem>O=C1C2[C@]1(CCC3[C@@]2(Cc2ncnc2[C@H]3C)C)(C)[C@]2(CC[C@@]3([C@H](C2=C1)[C@@H](C)[C@@H](C</chem>         |
| 385 | 3-epi-a-KBA.mol                       | <chem>O=C1C2[C@]1(CCC3[C@]1(C(O)=O)(C)[C@@H](O)CC[C@]23C)(C)[C@]2(CC[C@@]3([C@@H](CC(C3)C)C)C2</chem>         |
| 386 | 3-epi-b-KBA                           | <chem>O=C1C2[C@]1(CCC3[C@]1(C(O)=O)(C)[C@@H](O)CC[C@]23C)(C)[C@]2(CC[C@@]3([C@H](C2=C1)[C@@H](C)</chem>       |
| 387 | 3-epi-a-AKBA                          | <chem>O=C1C2[C@]1(CCC3[C@]1(C(O)=O)(C)[C@@H](OC(=O)C)CC[C@]23C)(C)[C@]2(CC[C@@]3([C@@H](CC(C3)C</chem>        |
| 388 | 3-epi-b-AKBA                          | <chem>O=C1C2[C@]1(CCC3[C@]1(C(O)=O)(C)[C@@H](OC(=O)C)CC[C@]23C)(C)[C@]2(CC[C@@]3([C@H](C2=C1)[C@</chem>       |
| 389 | a-KBA                                 | <chem>O=C1C2[C@]1(CCC3[C@]1(C(O)=O)(C)[C@@H](O)CC[C@]23C)(C)[C@]2(CC[C@@]3([C@@H](CC(C3)C)C)C2=</chem>        |
| 390 | Keto-b-Boswellic acid-bKBA            | <chem>O=C1C2[C@]1(CCC3[C@]1(C(O)=O)(C)[C@@H](O)CC[C@]23C)(C)[C@]2(C(=C1)C1[C@@H](C)[C@@H](CC[C@@]1</chem>     |
| 391 | Keto-boswellic acid.mol               | <chem>O=C1C2[C@]1(CCC3[C@]1(C(O)=O)(C)[C@@H](O)CC[C@]23C)(C)[C@]2(C(=C1)C1[C@@H](C)[C@@H](CC[C@@]1</chem>     |
| 392 | a-AKBA                                | <chem>O=C1C2[C@]1(CCC3[C@]1(C(O)=O)(C)[C@@H](OC(=O)C)CC[C@]23C)(C)[C@]2(CC[C@@]3([C@@H](CC(C3)C</chem>        |
| 393 | 3-a-Acetyl-11-keto-b-Boswellic acid-A | <chem>O=C1C2[C@]1(CCC3[C@]1(C(O)=O)(C)[C@@H](OC(=O)C)CC[C@]23C)(C)[C@]2(C(=C1)C1[C@@H](C)[C@@H](CC</chem>     |
| 394 | BCL-21.mol                            | <chem>O=C1C2[C@]1(CCC3[C@]1(C(O)=O)(C)[C@@H](OC(=O)C)CC[C@]23C)(C)[C@]2(C(=C1)C1[C@@H](C)[C@@H](CC</chem>     |
| 395 | S85                                   | <chem>O=C1C2[C@]1(CCC3[C@]1(C(OC(CCCOC(=O)[C@@]4(C5CC[C@@]6(C(C([C@]5(CC[C@H]40C)C(=O)C=C4C5[C@@H](</chem>    |
| 396 | S94                                   | <chem>O=C1C2[C@]1(CCC3[C@]1(C(OC(CCCOC(=O)[C@@]4(C5CC[C@@]6(C(C([C@]5(CC[C@H]40C(=O)C)C(=O)C=C4C5[</chem>     |
| 397 | S82                                   | <chem>O=C1C2[C@]1(CCC3[C@]1(C(OC(CCCOC(=O)[C@@]4(C5CC[C@@]6(C(C([C@]5(CC[C@H]40C(=O)C)C(=O)C=C4C5[</chem>     |
| 398 | S84                                   | <chem>O=C1C2[C@]1(CCC3[C@]1(C(OC(CCCOC(=O)[C@@]4(C5CC[C@@]6(C(C([C@]5(CC[C@H]40C)C(=O)C=C4C5[@@H](C</chem>    |
| 399 | S93                                   | <chem>O=C1C2[C@]1(CCC3[C@]1(C(OC(CCCOC(=O)[C@@]4(C5CC[C@@]6(C(C([C@]5(CC[C@H]40C(=O)C)C(=O)C=C4C5[</chem>     |
| 400 | S81                                   | <chem>O=C1C2[C@]1(CCC3[C@]1(C(OC(CCCOC(=O)[C@@]4(C5CC[C@@]6(C(C([C@]5(CC[C@H]40C(=O)C)C(=O)C=C4C5[</chem>     |
| 401 | S83                                   | <chem>O=C1C2[C@]1(CCC3[C@]1(C(OC(COC(=O)[C@@]4(C5CC[C@@]6(C(C([C@]5(CC[C@H]40C)C(=O)C=C4C5[@@H](C</chem>      |
| 402 | S92                                   | <chem>O=C1C2[C@]1(CCC3[C@]1(C(OC(COC(=O)[C@@]4(C5CC[C@@]6(C(C([C@]5(CC[C@H]40C(=O)C)C(=O)C=C4C5[@@</chem>     |
| 403 | S80                                   | <chem>O=C1C2[C@]1(CCC3[C@]1(C(OC(COC(=O)[C@@]4(C5CC[C@@]6(C(C([C@]5(CC[C@H]40C(=O)C)C(=O)C=C4C5[@@</chem>     |
| 404 | S4                                    | <chem>O=C1C2[C@]1(CCC3[C@]1(C(OCc4cccc4)=O)(C)[C@H](O)CC[C@]23C)(C)[C@]2(CC[C@@]3([C@H](C2=C1)[</chem>        |
| 405 | S19                                   | <chem>O=C1C2[C@]1(CCC3[C@]1(c4nc5c(nc4[C@]23C)cccc5)(C(OCc2cccc2)=O)C)(C)[C@]2(CC[C@@]3([C@H](C</chem>        |
| 406 | S22                                   | <chem>O=C1C2[C@]1(CCC3[C@]1(c4ncnc4[C@]23C)(C(OCc2cccc2)=O)C)(C)[C@]2(CC[C@@]3([C@H](C2=C1)[</chem>           |
| 407 | S58                                   | <chem>O=C1C2[C@]1(C[C[C@@H]3[C@]2(C(C(C(CN)(C(OCc3cccc3)=O)C)C2(C)C)(C)[C@]2(CC[C@@]3([C@H](C2=C1)[C@@</chem> |
| 408 | S9                                    | <chem>O=C1C2[C@]1(C[C[C@@H]3[C@]2(C(C2c([nH]c4c2cccc4)C3(C)C)C)(C)[C@]2(CC[C@@]3([C@H](C2=C1)[C@</chem>       |
| 409 | S49                                   | <chem>O=C1C2[C@]1(C[C[C@@H]3[C@]2(C(C[C@@H](OC)C=C[C@@]3(C(OC)=O)C)(C)[C@]2(CC[C@@]3([C@H](C2=C1)[</chem>     |
| 410 | S48                                   | <chem>O=C1C2[C@]1(C[C[C@@H]3[C@]2(C(C)[C@H](OC)C=C[C@@]3(C(OC)=O)C)(C)[C@]2(CC[C@@]3([C@H](C2=C1)[</chem>     |
| 411 | S70                                   | <chem>O=C1C2[C@]1(C[C[C@@H]3[C@]2(C(C(=O)NCC(OC)=O)(C)[C@H](OC(=O)C)CC[C@]23C)(C)[C@]2(CC[C@@]3([C@</chem>    |
| 412 | S71                                   | <chem>O=C1C2[C@]1(C[C[C@@H]3[C@]2(C(C(=O)NCCC(OC)=O)(C)[C@H](OC(=O)C)CC[C@]23C)(C)[C@]2(CC[C@@]3([C@</chem>   |
| 413 | S73                                   | <chem>O=C1C2[C@]1(C[C[C@@H]3[C@]2(C(C(=O)NCCCO)(C)[C@H](OC(=O)C)CC[C@]23C)(C)[C@]2(CC[C@@]3([C@H](C2</chem>   |
| 414 | S72                                   | <chem>O=C1C2[C@]1(C[C[C@@H]3[C@]2(C(C(=O)N[C@H](CCC(OC)=O)C(OC)=O)(C)[C@H](OC(=O)C)CC[C@]23C)(C)[C@]2</chem>  |
| 415 | S59                                   | <chem>O=C1C2[C@]1(C[C[C@@H]3[C@]2(C(C(O)=O)(C)[C@@H](N)CC[C@]23C)(C)[C@]2(CC[C@@]3([C@H](C2=C1)[C@@H</chem>   |
| 416 | S27                                   | <chem>O=C1C2[C@]1(C[C[C@@H]3[C@]2(C(C(OC)=O)(C)[C@@H](O)CC[C@]23C)(C)[C@]2(CC[C@@]3([C@H](C2=C1)[C@@</chem>   |
| 417 | S32                                   | <chem>O=C1C2[C@]1(C[C[C@@H]3[C@]2(C(C(OC)=O)(C)[C@@H](O)CC[C@]23C)(C)[C@]2(CC[C@@]3([C@H](C2=C1)[C@@</chem>   |
| 418 | S66                                   | <chem>O=C1C2[C@]1(C[C[C@@H]3[C@]2(C(C(OC)=O)(C)[C@H](CC[C@]23C)C(O)=O)(C)[C@]2(CC[C@@]3([C@H](C2=C1)</chem>   |
| 419 | S65                                   | <chem>O=C1C2[C@]1(C[C[C@@H]3[C@]2(C(C(OC)=O)(C)[C@H](CC[C@]23C)C(=O)(C)[C@]2(CC[C@@]3([C@H](C2=C1)[C@</chem>  |
| 420 | S35                                   | <chem>O=C1C2[C@]1(C[C[C@@H]3[C@]2(C(C(OC)=O)(C)[C@H](O)C=C[C@]23C)(C)[C@]2(CC[C@@]3([C@H](C2=C1)[C@@</chem>   |
| 421 | S24                                   | <chem>O=C1C2[C@]1(C[C[C@@H]3[C@]2(C(C(OC)=O)(C)[C@H](O)CC[C@]23C)(C)[C@]2(CC[C@@]3([C@H](C2=C1)[C@@H</chem>   |
| 422 | S29                                   | <chem>O=C1C2[C@]1(C[C[C@@H]3[C@]2(C(C(OC)=O)(C)[C@H](O)CC[C@]23C)(C)[C@]2(CC[C@@]3([C@H](C2=C1)[C@@H</chem>   |
| 423 | S50                                   | <chem>O=C1C2[C@]1(C[C[C@@H]3[C@]2(C(C(OC)=O)(C)[C@H](O)CC[C@]23C)(C)[C@]2(CC[C@@]3([C@H](C2=C1)[C@@H</chem>   |
| 424 | S38                                   | <chem>O=C1C2[C@]1(C[C[C@@H]3[C@]2(C(C(OC)=O)(C)[C@H](O)[C@@H](O)C[C@]23C)(C)[C@]2(CC[C@@]3([C@H](C2=</chem>   |
| 425 | S10                                   | <chem>O=C1C2[C@]1(C[C[C@@H]3[C@]2(C(OCc4cccc4)=O)(C)/C(=N/Nc4cccc([N+](=O)[O-])cc4[N+](=O)[O-])/CC[</chem>    |
| 426 | S57                                   | <chem>O=C1C2[C@]1(C[C[C@@H]3[C@]2(C(OCc4cccc4)=O)(C)/C(=N/O)/CC[C@]23C)(C)[C@]2(CC[C@@]3([C@H](C2</chem>      |
| 427 | S34                                   | <chem>O=C1C2[C@]1(C[C[C@@H]3[C@]2(C(C=C[C@]23C)(C(OC)=O)C)(C)[C@]2(CC[C@@]3([C@H](C2=C1)[C@@H](C)[C</chem>    |

|     | mol                                   | SMILES                                                                                               |
|-----|---------------------------------------|------------------------------------------------------------------------------------------------------|
| 428 | S44                                   | <chem>O=C1C2[C@](CC[C@H]3[C@](C=CC[C@]23C)(C(OC)=O)C)(C)[C@]2(CC[C@]3([C@H](C2=C1)[C@H](CCC3</chem>  |
| 429 | S36                                   | <chem>O=C1C2[C@](CC[C@H]3[C@](CCC[C@]23C)(C(OC)=O)C)(C)[C@]2(CC[C@]3([C@H](C2=C1)[C@H](C)[C@</chem>  |
| 430 | S7                                    | <chem>O=C1C2[C@](CC[C@H]3[C@](CCC[C@]23C)(C(OCc2ccccc2)=O)C)(C)[C@]2(CC[C@]3([C@H](C2=C1)[C@</chem>  |
| 431 | S5                                    | <chem>O=C1C2[C@](CC[C@H]3[C@](c4[nH]c5c(c4C[C@]23C)cccc5)(C(OCc2ccccc2)=O)C)(C)[C@]2(CC[C@]3(</chem> |
| 432 | S17                                   | <chem>O=C1C=C[C@]2(C3[C@](CCC2[C@H]1C)(C)[C@]1(CCC[C@]2([C@H](C1=CC3=O)[C@H](C)[C@H](CC2)C</chem>    |
| 433 | S25                                   | <chem>O=C1=C[C@]2([C@H](CC[C@]3(C2C(=O)C=C2[C@H]4[C@H](C)[C@H](CC[C@]4(CC[C@]23C)C)C)C)[</chem>      |
| 434 | S30                                   | <chem>O=C1C=C[C@]2([C@H](CC[C@]3(C2C(=O)C=C2[C@H]4[C@H](C)[C@H](CC[C@]4(CC[C@]23C)C)C)C)[</chem>     |
| 435 | DJ-501                                | <chem>O=C1CC2C=C3C4CC[C@H]([C@H](CCCC(C)C)C)[C@]4(CCC3[C@]2(CC1)C)C</chem>                           |
| 436 | S16                                   | <chem>O=C1CC[C@]2(C3[C@](CCC2=C1C)(C)[C@]1(CC[C@]2([C@H](C1=CC3=O)[C@H](C)[C@H](CC2)C)C)C</chem>     |
| 437 | SF-1P-2                               | <chem>O=C1CC[C@]2(C3[C@](CCCC2C1(C)C)(C)[C@]1(C(=CC3=O)C2[C@H](C)[C@H](CC[C@]2(CC1)C)C)C)C</chem>    |
| 438 | S2                                    | <chem>O=C1CC[C@]2(C3[C@](CCC2[C@H]1C)(C)[C@]1(CC[C@]2([C@H](C1=CC3=O)[C@H](C)[C@H](CC2)C)</chem>     |
| 439 | S3                                    | <chem>O=C1CC[C@]2(C3[C@](CCC2[C@]1(C)C(=O)C)(C)[C@]1(CC[C@]2([C@H](C1=CC3=O)[C@H](C)[C@H](</chem>    |
| 440 | DJEH-10-S1                            | <chem>O=C1CC[C@]2(C(C(=C3C4CC[C@H]([C@H](CCCC(C)C)C)[C@]4(CCC23)C)[C@H]1C)C</chem>                   |
| 441 | 11b-Hydroxy-3-oxours-12-ene           | <chem>O=C1CC[C@]2(C(C(=C[C@]3(C2[C@H](O)C=C2C4[C@H](C)[C@H](CC[C@]4(CC[C@]23C)C)C)C)C1(C)C)C</chem>  |
| 442 | 11b Hydroxy 3 oxours 12 ene.mol       | <chem>O=C1CC[C@]2(C(C(=C[C@]3(C2[C@H](O)C=C2C4[C@H](C)[C@H](CC[C@]4(CC[C@]23C)C)C)C)C1(C)C)C</chem>  |
| 443 | 11-beta-hydroxy-3-oxours-12ene.mol    | <chem>O=C1CC[C@]2(C(C(=C[C@]3(C2[C@H](O)C=C2C4[C@H](C)[C@H](CC[C@]4(CC[C@]23C)C)C)C)C1(C)C)C</chem>  |
| 444 | BAEH-10                               | <chem>O=C1CC[C@]2(C(C(=C[C@](O)(C)C2CC=C(C\CC\C=C(\CC\C=C(\CC(=O)=O)/C)/C)C1(C)C)C</chem>            |
| 445 | Nizwanone                             | <chem>O=C1CC[C@]2(C(C[C@H](O)[C@]3(C2CC=C2C4[C@H](C)[C@H](CC[C@]4(CC[C@]23C)C)C)C)C1(C)C)C</chem>    |
| 446 | Nizwanon.mol                          | <chem>O=C1CC[C@]2(C(C[C@H](O)[C@]3(C2CC=C2C4[C@H](C)[C@H](CC[C@]4(CC[C@]23C)C)C)C)C1(C)C)C</chem>    |
| 447 | S54                                   | <chem>O=C1CC[C@]2([C@H](CC[C@]3(C2C(=O)C=C2[C@H]4[C@H](C)[C@H](CC[C@]4(CC[C@]23C)C)C)C)[C</chem>     |
| 448 | S26                                   | <chem>O=C1CC[C@]2([C@H](CC[C@]3(C2C(=O)C=C2[C@H]4[C@H](C)[C@H](CC[C@]4(CC[C@]23C)C)C)C)[C</chem>     |
| 449 | S31                                   | <chem>O=C1CC[C@]2([C@H](CC[C@]3(C2C(=O)C=C2[C@H]4[C@H](C)[C@H](CC[C@]4(CC[C@]23C)C)C)C)[C</chem>     |
| 450 | S55                                   | <chem>O=C1CC[C@]2([C@H](CC[C@]3(C2C(=O)C=C2[C@H]4[C@H](C)[C@H](CC[C@]4(CC[C@]23C)C)C)C)[C</chem>     |
| 451 | S8                                    | <chem>O=C1CC[C@]2([C@H](CC[C@]3(C2C(=O)C=C2[C@H]4[C@H](C)[C@H](CC[C@]4(CC[C@]23C)C)C)C)[C</chem>     |
| 452 | S15                                   | <chem>O=C1CC[C@]2([C@H](CC[C@]3(C2C(=O)C=C2[C@H]4[C@H](C)[C@H](CC[C@]4(CC[C@]23C)C)C)C)[C</chem>     |
| 453 | S56                                   | <chem>O=C1CC[C@]2([C@H](CC[C@]3(C2C(=O)C=C2[C@H]4[C@H](C)[C@H](CC[C@]4(CC[C@]23C)C)C)C)[C</chem>     |
| 454 | S1                                    | <chem>O=C1CC[C@]2([C@H](CC[C@]3(C2CC=C2[C@H]4[C@H](C)[C@H](CC[C@]4(CC[C@]23C)C)C)C)C1(C)C</chem>     |
| 455 | 6G.mol                                | <chem>O=C1N(CCC2ccccc2)C(c2cc3c(nc2-n2nnc(c12)-c1ccccc1)cccc3)C(=O)NC(C)(C)C</chem>                  |
| 456 | 6H.mol                                | <chem>O=C1N(CCC2ccccc2)C(c2cc3c(nc2-n2nnc(c12)-c1ccccc1)cccc3)C(=O)NC1CCCCC1</chem>                  |
| 457 | 6I.mol                                | <chem>O=C1N(CCC2ccccc2)C(c2cc3c(nc2-n2nnc(c12)cccc3)C(=O)NC(C)(C)C</chem>                            |
| 458 | 6J.mol                                | <chem>O=C1N(CCC2ccccc2)C(c2cc3c(nc2-n2nnc(c12)cccc3)C(=O)NC1CCCCC1</chem>                            |
| 459 | 6C.mol                                | <chem>O=C1N(CCC2ccccc2)C(c2cc3cc(ccc3nc2-n2nnc(c12)-c1ccccc1)C)C(=O)NC(C)(C)C</chem>                 |
| 460 | 6N.mol                                | <chem>O=C1N(Cc2ccc(cc2)C)C(c2cc3c(nc2-n2nnc(c12)cccc3)C(=O)NC(C)(C)C</chem>                          |
| 461 | 6M.mol                                | <chem>O=C1N(Cc2ccc(cc2)C)C(c2cc3c(nc2-n2nnc(c12)cccc3)C(=O)NC1CCCCC1</chem>                          |
| 462 | 6O.mol                                | <chem>O=C1N(Cc2ccc(cc2)C)C(c2cc3cc(ccc3nc2-n2nnc(c12)-c1ccccc1)C)C(=O)NC(C)(C)C</chem>               |
| 463 | 6K.mol                                | <chem>O=C1N(Cc2ccc(cc2)C)C(c2cc3cc(ccc3nc2-n2nnc(c12)-c1ccccc1)C)C(=O)NC1CCCCC1</chem>               |
| 464 | 6B.mol                                | <chem>O=C1N(Cc2ccccc2)C(c2cc3c(nc2-n2nnc(c12)-c1ccccc1)cccc3)C(=O)NC(C)(C)C</chem>                   |
| 465 | 6A.mol                                | <chem>O=C1N(Cc2ccccc2)C(c2cc3c(nc2-n2nnc(c12)-c1ccccc1)cccc3)C(=O)NC1CCCCC1</chem>                   |
| 466 | 6F.mol                                | <chem>O=C1N(Cc2ccccc2)C(c2cc3c(nc2-n2nnc(c12)cccc3)C(=O)NC(C)(C)C</chem>                             |
| 467 | 6E.mol                                | <chem>O=C1N(Cc2ccccc2)C(c2cc3c(nc2-n2nnc(c12)cccc3)C(=O)NC1CCCCC1</chem>                             |
| 468 | 6L.mol                                | <chem>O=C1N(Cc2ccccc2)C(c2cc3cc(ccc3nc2-n2nnc(c12)-c1ccccc1)C)C(=O)NC(C)(C)C</chem>                  |
| 469 | 6D.mol                                | <chem>O=C1N(Cc2ccccc2)C(c2cc3cc(ccc3nc2-n2nnc(c12)-c1ccccc1)C)C(=O)NC1CCCCC1</chem>                  |
| 470 | R-NPG-21.cdx                          | <chem>O=C1N(\C(=C/c2ccc(cc2)\C=C(\N2C(=O)c3c(cccc3)C2=O)/C(O)=O)\C(O)=O)C(=O)c2c1cccc2</chem>        |
| 471 | R-NPG-16.cdx                          | <chem>O=C1N(\C(=C/c2ccc(cc2)\C=C(\N2C(=O)c3c(cccc3)C2=O)/C(O)=O)\C(O)=O)C(=O)c2c1cccc2</chem>        |
| 472 | R-NPG-17.cdx                          | <chem>O=C1N(\C(=C/c2ccc([N+])(=O)[O-])cc2)\C(O)=O)C(=O)c2c1cccc2</chem>                              |
| 473 | R-NPG-18.cdx                          | <chem>O=C1N(\C(=C/c2ccc(cc2)C(C)C)\C(O)=O)C(=O)c2c1cccc2</chem>                                      |
| 474 | R-NPG-5.cdx                           | <chem>O=C1N(\C(=C/c2ccc(cc2)C(OC)=O)\C(O)=O)C(=O)c2c1cccc2</chem>                                    |
| 475 | R-NPG-12.cdx                          | <chem>O=C1N(\C(=C/c2ccc(cc2)C)\C(O)=O)C(=O)c2c1cccc2</chem>                                          |
| 476 | R-NPG-11.cdx                          | <chem>O=C1N(\C(=C/c2ccc(cc2)C)\C(O)=O)C(=O)c2c1cccc2</chem>                                          |
| 477 | R-NPG-1.cdx                           | <chem>O=C1N(\C(=C/c2ccccc2)\C(O)=O)C(=O)c2c1cccc2</chem>                                             |
| 478 | R-NPG-23.cdx                          | <chem>O=C1N(\C(=C/c2ncccc2)\C(O)=O)C(=O)c2c1cccc2</chem>                                             |
| 479 | S18                                   | <chem>O=C1NCC[C@]2(C3[C@](CCC2[C@]1(C(=O)N)C)(C)[C@]1(CC[C@]2([C@H](C1=CC3=O)[C@H](C)[C@H]</chem>    |
| 480 | S6                                    | <chem>O=C1NN=C2CC[C@]3([C@H](CC[C@]4(C3C(=O)C=C3[C@H]5[C@H](C)[C@H](CC[C@]5(C[C@]34C)C)C</chem>      |
| 481 | S62                                   | <chem>O=C1[C@H]([C@H]2CC[C@]3(C([C@]2(C=C1NC(=O)C)C)C(=O)C=C1[C@H]2[C@H](C)[C@H](CC[C@]2(</chem>     |
| 482 | S68                                   | <chem>O=C1[C@H]([C@H]2CC[C@]3(C([C@]2(C[C@H]10)C)C(=O)C=C1[C@H]2[C@H](C)[C@H](CC[C@]2(CC</chem>      |
| 483 | SF-10-3                               | <chem>OC(=O)CCCCCCCCCCCCCCCCCCCCC</chem>                                                             |
| 484 | 1.cdx                                 | <chem>OC(=O)\C=C\C1ccc(cc1)\C=C\C(O)=O</chem>                                                        |
| 485 | 25-Isoserratol                        | <chem>OC(C)(C)C1CC=C(CCCC(=CCCC(=CC1)C)C)C</chem>                                                    |
| 486 | 13-Duva-4-8-13-triene-1-3-?-diol      | <chem>OC1(CC(O)C=C(CCC=C(CCC(C=C1)C(C)C)C)C)C</chem>                                                 |
| 487 | 1-Serratol                            | <chem>OC1(CC=C(CCCC(=CCCC(=CC1)C)C)C)C(C)C</chem>                                                    |
| 488 | 15-Duva-3,9,13-triene-1,5-?-diol-1-ac | <chem>OC1(CC=CC(O)(CCC=C(CCC(C=C1)C(C)C)C)C)C</chem>                                                 |



|     | mol                                   | SMILES                                                                                                |
|-----|---------------------------------------|-------------------------------------------------------------------------------------------------------|
| 489 | 12-Thumbergol                         | <chem>OC1(CCC=C(CCC=C(CCC(C=C1)C(C)=C)C)C)C</chem>                                                    |
| 490 | S63                                   | <chem>OC1(C[C@]2([C@H]([C@]3(C2C(=O)C=C2[C@H]4[C@H](C)[C@H]([C@]4(CC[C@]23C)C)C)C)[C@]</chem>         |
| 491 | 2.cdx                                 | <chem>OC1(C\C=C(C(\C)/C)C(=O)C2C(NC1=O)CCCC2</chem>                                                   |
| 492 | S69                                   | <chem>OC1=C[C@]2([C@H]([C@]3(C2C(=O)C=C2[C@H]4[C@H](C)[C@H]([C@]4(CC[C@]23C)C)C)C)[C@</chem>          |
| 493 | 35-2a,3a-dihydroxy-urs-12-ene-24-oic  | <chem>OC1C(C2CCC3(C(C=C4C5C(C)C(CCC5(CCC34C)C)C)C2(CC10)C)C)C(C(O)=O)C</chem>                         |
| 494 | PDCM-28                               | <chem>OC1C2[C@]([CC3[C@H]2(CCC(=O)C3(C)C)C)[C@]2(C(C1)C1[C@H]([CC2]([C@H]1C(C)=C)C)C</chem>           |
| 495 | 11-hydroxy 20(29)-lupene-3-one.mol    | <chem>OC1C2[C@]([CC3[C@H]2(CCC(=O)C3(C)C)C)(C)[C@]2(C(C1)C1[C@H]([CC2]([C@H]1C(C)=C)C)C</chem>        |
| 496 | DJEH-2                                | <chem>OC1CC2CC=C3C4CC[C@H]([C@H]([C@]3(C(C)C)C)C)C)[C@]4(CCC3[C@]2(CC1)C)C</chem>                     |
| 497 | DJEH-11                               | <chem>OC1CC2CC=C3C4CC[C@H]([C@H]([C@]3(C(C)C)C)C)[C@]4(CCC3[C@]2(CC1)C)C</chem>                       |
| 498 | 38-9,11-dehydro-b-boswellic acid      | <chem>OC1CCC2(C(CCC3(C2CC=C2C4C(C)C(CCC4(CCC23C)C)C)C)C1(C(O)=O)C)C</chem>                            |
| 499 | 40-9,11-dehydro-?- boswellic acid     | <chem>OC1CCC2(C(CCC3(C2CC=C2C4CC(CCC4(CCC23C)C)C)C)C)C1(C(O)=O)C)C</chem>                             |
| 500 | NJAODCH-75C                           | <chem>OC1CCC2(C(CCC3(C2CC=C2C4C(C)C(CCC4(CCC23C)C)C)C)C)C1(C(O)=O)C)C</chem>                          |
| 501 | 28-b-Boswellic acid                   | <chem>OC1CCC2(C(CCC3(C2CC=C2C4C(C)C(CCC4(CCC23C)C)C)C)C)C1(C(O)=O)C)C</chem>                          |
| 502 | 44-3-epi-b-Boswellic acid             | <chem>OC1CCC2(C(CCC3(C2CC=C2C4C(C)C(CCC4(CCC23C)C)C)C)C)C1(C(O)=O)C)C</chem>                          |
| 503 | BEDH-40                               | <chem>OC1CCC2(C(CCC3(C2CC=C2C4C(C)C(CCC4(CCC23C)C)C)C)C)C1(C)C)C</chem>                               |
| 504 | a-amyrin                              | <chem>OC1CCC2(C(CCC3(C2CC=C2C4C(C)C(CCC4(CCC23C)C)C)C)C)C1(C)C)C</chem>                               |
| 505 | 32-?-Boswellic acid                   | <chem>OC1CCC2(C(CCC3(C2CC=C2C4CC(CCC4(CCC23C)C)C)C)C)C1(C(O)=O)C)C</chem>                             |
| 506 | 46-3-epi-?-Boswellic acid             | <chem>OC1CCC2(C(CCC3(C2CC=C2C4CC(CCC4(CCC23C)C)C)C)C)C1(C(O)=O)C)C</chem>                             |
| 507 | QTH-25                                | <chem>OC1CCC2(C(CCC3(C2CC2C4C(CCC23C)C(CCC4C(C)=C)C(O)=O)C)C1(C)C)C</chem>                            |
| 508 | 29-11-keto-b-Boswellic acid           | <chem>OC1CCC2(C3C(CCC2C1(C(O)=O)C)(C)C1(C(C2C(C)C(CCC2(CC1)C)C)=CC3=O)C)C</chem>                      |
| 509 | 45-3-epi-11-keto-b-Boswellic acid     | <chem>OC1CCC2(C3C(CCC2C1(C(O)=O)C)(C)C1(C(C2C(C)C(CCC2(CC1)C)C)=CC3=O)C)C</chem>                      |
| 510 | 34-3,11-dihydroxy-12-ene-24-oic acids | <chem>OC1CCC2(C3C(CCC2C1(C(O)=O)C)(C)C1(C(C2C(C)C(CCC2(CC1)C)C)=CC3O)C)C</chem>                       |
| 511 | DJEH-10                               | <chem>OC1CC[C@]2(C(C(C=C3C4CC[C@H]([C@H]([C@]3(C(C)C)C)C)[C@]4(CCC23C)C)[C@H]1C)C</chem>              |
| 512 | NBEH-101                              | <chem>OC1CC[C@]2(C(C[C@]3(C2CCC2C4[C@]([C@]3(C(C)C)C)C)C)C1(C)C)C</chem>                              |
| 513 | Lupeol.mol                            | <chem>OC1CC[C@]2(C(C[C@]3(C2CCC2C4[C@]([C@]3(C(C)C)C)C)C)C1(C)C)C</chem>                              |
| 514 | BAEH-5                                | <chem>OC1CC[C@]2(C(C[C@]3(C)C)C2CC(C=C(C\C(C)C=C(C\C(C)C=C(C\C(C)C)C)/C)/C)C1(C)C)C</chem>            |
| 515 | 6.cdx                                 | <chem>OC=1C2C(NC(=O)C=C1C=C(C(\C)/C)CCCC2</chem>                                                      |
| 516 | R-NPG-6.cdx                           | <chem>OC=1C2C(CCCC2)C(CC=1)\C=C(\N1C(=O)C2C(CCCC2)C1=O)/C(O)=O</chem>                                 |
| 517 | NJAODH-70                             | <chem>OC1CCCCCCCCCCCCCCCCC</chem>                                                                     |
| 518 | BEMD-40                               | <chem>O[C@H]1CC2=CC3C4CCC([C@H]([C@]1(C(C)C)CC)C)[C@]4(CCC3[C@]2(CC1)C)C</chem>                       |
| 519 | UA.mol                                | <chem>O[C@H]1CC2C[C@H](O)[C@H]3[C@H]4CC[C@H]([C@H]([C@]3(C(C)C)C)C)[C@]4(CC[C@H]3[C@]2(CC1)C)C</chem> |
| 520 | 9,11-dehydro-b-Boswellic acid         | <chem>O[C@H]1CC[C@]2(C(C[C@]3(C2CC=C2C4[C@H](C)[C@H]([C@]3(C(C)C)C)C)C)C)[C@]1(C(CO)=</chem>          |
| 521 | 3-beta,24-dihydroxius-9(11)-12 diene. | <chem>O[C@H]1CC[C@]2(C(C[C@]3(C2CC=C2C4[C@H](C)[C@H]([C@]3(C(C)C)C)C)C)C)[C@]1(CO)C</chem>            |
| 522 | Olean-11-13 (18).mol                  | <chem>O[C@H]1CC[C@]2(C(C[C@]3(C2CC=CC2=C4[C@H](C)[C@H]([C@]3(C(C)C)C)C)C)C)[C@]1(CO)C</chem>          |
| 523 | Ursolic Acid.mol                      | <chem>O[C@H]1CC[C@]2(C(C[C@]3(C2CC=CC2=C4[C@H](C)[C@H]([C@]3(C(C)C)C)C)C)C)C1</chem>                  |
| 524 | Alfa-Amyrin.mol                       | <chem>O[C@H]1CC[C@]2(C(C[C@]3(C2CC=CC2=C4[C@H](C)[C@H]([C@]3(C(C)C)C)C)C)C)C1(C)C</chem>              |
| 525 | Epi-amyrine                           | <chem>O[C@H]1CC[C@]2(C(C[C@]3(C2CC=CC2=C4[C@H](C)[C@H]([C@]3(C(C)C)C)C)C)C)C1(C)C</chem>              |
| 526 | PDCM-701                              | <chem>O[C@H]1CC[C@]2(C(C[C@]3(C2CC=C2C4[C@H](C)[C@H]([C@]3(C(C)C)C)C)C)C)C1(C(O)=O</chem>             |
| 527 | B-Boswellic acid                      | <chem>O[C@H]1CC[C@]2(C(C[C@]3(C2CC=C2C4[C@H](C)[C@H]([C@]3(C(C)C)C)C)C)C)C1(C(O)=O</chem>             |
| 528 | 3-epi-b-Amyrin                        | <chem>O[C@H]1CC[C@]2(C(C[C@]3(C2CC=C2C4[C@H]4CC(C[C@]4(CC[C@]23C)C)C)C)C)C1(C)C)C</chem>              |
| 529 | a-Boswellic Acid                      | <chem>O[C@H]1CC[C@]2(C(C[C@]3(C2CC=C2[C@H]4CC(C[C@]4(CC[C@]23C)C)C)C)C)[C@]1(C(O)=O)C)C</chem>        |
| 530 | S88                                   | <chem>O[C@H]1CC[C@]2(C(C[C@]3(C2CC=C2[C@H]4[C@H](C)[C@H]([C@]3(C(C)C)C)C)C)C)C1(C)C</chem>            |
| 531 | S87                                   | <chem>O[C@H]1CC[C@]2(C(C[C@]3(C2CC=C2[C@H]4[C@H](C)[C@H]([C@]3(C(C)C)C)C)C)C)C)C1(C)C</chem>          |
| 532 | S86                                   | <chem>O[C@H]1CC[C@]2(C(C[C@]3(C2CC=C2[C@H]4[C@H](C)[C@H]([C@]3(C(C)C)C)C)C)C)C)C1(C)C</chem>          |
| 533 | Lupeol.mol                            | <chem>O[C@H]1CC[C@]2(C(C[C@]3(C2CCC2C4[C@H]([C@]3(C(C)C)C)C)C)C)C1(C)C)C</chem>                       |
| 534 | L-A.mol                               | <chem>O[C@H]1CC[C@]2([C@H]([C1)CC[C@H]1[C@H]3CCCC([C@]3(CCC(=O)N)C)[C@]3(CC[C@H]12)C)C.CC</chem>      |
| 535 | S53                                   | <chem>O[C@H]1CC[C@]2([C@H]([C@]3(C2CC=CC2[C@H]4[C@H](C)[C@H]([C@]3(C(C)C)C)C)C)C)C)C1</chem>          |
| 536 | S28                                   | <chem>O[C@H]1CC[C@]2([C@H]([C@]3(C2CC=CC2[C@H]4[C@H](C)[C@H]([C@]3(C(C)C)C)C)C)C)C)C1</chem>          |
| 537 | S33                                   | <chem>O[C@H]1CC[C@]2([C@H]([C@]3(C2CC=CC2[C@H]4[C@H](C)[C@H]([C@]3(C(C)C)C)C)C)C)C)C1</chem>          |
| 538 | S51                                   | <chem>O[C@H]1CC[C@]2([C@H]([C@]3(C2CC=CC2[C@H]4[C@H](C)[C@H]([C@]3(C(C)C)C)C)C)C)C)C1</chem>          |
| 539 | S52                                   | <chem>O[C@H]1CC[C@]2([C@H]([C@]3(C2CC=CC2[C@H]4[C@H](C)[C@H]([C@]3(C(C)C)C)C)C)C)C)C1</chem>          |
| 540 | FR-40                                 | <chem>O[C@H]1[C@](C2CC[C@]3(C(C=C4C5[C@]([C@]3(C4C)C)C)C)C)C1</chem>                                  |
| 541 | SF-7-2                                | <chem>O[C@H]1CC[C@]2(C(C[C@]3(C2CC=CC2C4[C@H](C)[C@H]([C@]3(C(C)C)C)C)C)C)C1(C)C)C</chem>             |
| 542 | 3b, 24-dihydroxiurs, 9(11):12 diene   | <chem>O[C@H]1CC[C@]2(C(C[C@]3(C2CC=CC2C4[C@H](C)[C@H]([C@]3(C(C)C)C)C)C)C)C)C1(C)C)C</chem>           |
| 543 | 3, 11-dihydroxy-12-enen-24 oic acid   | <chem>O[C@H]1CC[C@]2(C(C[C@]3(C2CC=CC2C4CC(C[C@]4(CC[C@]23C)C)C)C)C)C1(CO)C)C</chem>                  |
| 544 | Olean-11,13(18)-dien-3b, 24 diol      | <chem>O[C@H]1CC[C@]2(C(C[C@]3(C2CC=CC2C4CC(C[C@]4(CC[C@]23C)C)C)C)C)C)C1(CO)C)C</chem>                |
| 545 | ALPHA-amyrine acetate                 | <chem>O[C@H]1CC[C@]2(C(C[C@]3(C2CC=CC2C4[C@H](C)[C@H]([C@]3(C(C)C)C)C)C)C)C)C1(C)C)C</chem>           |
| 546 | R12                                   | <chem>O[C@H]1CC[C@]2(C(C[C@]3(C2CC=CC2C4[C@H](C)[C@H]([C@]3(C(C)C)C)C)C)C)C)C1(C)C)C</chem>           |
| 547 | R12.mol                               | <chem>O[C@H]1CC[C@]2(C(C[C@]3(C2CC=CC2C4[C@H](C)[C@H]([C@]3(C(C)C)C)C)C)C)C)C1(C)C)C</chem>           |
| 548 | 3-epi-a-Boswellic Acid                | <chem>O[C@H]1CC[C@]2(C(C[C@]3(C2CC=CC2[C@H]4CC(C[C@]4(CC[C@]23C)C)C)C)C)C1(C(O)=O)C)C</chem>          |
| 549 | 3-epi-b-Boswellic acid                | <chem>O[C@H]1CC[C@]2(C(C[C@]3(C2CC=CC2[C@H]4[C@H](C)[C@H]([C@]3(C(C)C)C)C)C)C)C)C1(C)C</chem>         |

|     | mol               | SMILES                                                                                                  |
|-----|-------------------|---------------------------------------------------------------------------------------------------------|
| 550 | H3CDEH-15         | <chem>O[C@H]1CC[C@]2(C(CC[C@H]3(C2CCC2C4[C@H](CC[C@H]23C)(CC[C@H]4C(C)=C)C(O)=O)C)C1(C)C</chem>         |
| 551 | NJAOMD2           | <chem>O[C@H]1CC[C@]2(C(CC[C@H]3(C2CCC2C4[C@H](CC[C@H]23C)(CC[C@H]4C(C)=C)C(O)=O)C)C1(C)C</chem>         |
| 552 | PDCM-55           | <chem>O[C@H]1CC[C@]2(C(CC[C@H]3(C2CCC2C4[C@H](CC[C@H]23C)(CC[C@H]4C(C)=C)C)C)C1(C)C</chem>              |
| 553 | PDCM-64           | <chem>O[C@H]1CC[C@]2(C(CC[C@H]3(C2CCC2C4[C@H](CC[C@H]23C)(CC[C@H]4C(C)=C)C)C)[C@]1(C(O)=O)C</chem>      |
| 554 | CH-A.mol          | <chem>O[C@H]1C[C@H]2[C@H]([C@H]3CC[C@H](C(CCC(=O)N)C)[C@H]13C)CC[C@H]1C[C@H](O)CC[C@H]12C</chem>        |
| 555 | DA.mol            | <chem>O[C@H]1C[C@H]2[C@H]([C@H]3CC[C@H](C(CCC(=O)N)C)[C@H]13C)CC[C@H]1C[C@H](O)CC[C@H]12C</chem>        |
| 556 | C-A.mol           | <chem>O[C@H]1C[C@H]2[C@H]([C@H]3CC[C@H](C(CCC(=O)N)C)[C@H]13C)[C@H](O)C[C@H]1C[C@H](O)CC[C@H]12C</chem> |
| 557 | Commic acid-D.mol | <chem>O[C@H]1[C@H](C2CC[C@H]3(C(CCC=C4[C@H]5[C@H](C)[C@H](CC[C@H]5(C[C@H]34C)C)C)[C@]2(C[C@H]1</chem>   |
| 558 | QTH-301           | <chem>Oc1c2c(cc(c1)C)C(=O)c1c(C2=O)c(0)cc(0)c1</chem>                                                   |
| 559 | QTH-20            | <chem>Oc1c2c(cc(c1)C)C(=O)c1c(C2=O)c(0)cc(0)c1</chem>                                                   |
| 560 | SBEH-20           | <chem>Oc1c2c(cc(c1)C)C(=O)c1c(C2=O)c(0)cc(0)c1</chem>                                                   |
| 561 | SBEH-16           | <chem>Oc1cc(0)cc(C)c1C(=O)C</chem>                                                                      |
| 562 | SBDM-114          | <chem>Oc1cc(0)cc2c1[C@H](C[C@H](O)C2)C</chem>                                                           |
| 563 | R-NPG-14.cdx      | <chem>Oc1cc(0)ccc1\C=C(\N1C(=O)c2c(cccc2)C1=O)/C(O)=O</chem>                                            |
| 564 | SBEH-11           | <chem>Oc1ccc(cc1)C</chem>                                                                               |
| 565 | SBM-002           | <chem>Oc1ccc(cc1)CCC(O)=O</chem>                                                                        |
| 566 | SBDM-M1           | <chem>Oc1ccc(cc1)CCC(OC)=O</chem>                                                                       |
| 567 | R-NPG-3.cdx       | <chem>Oc1ccc(cc1)\C=C(\N1C(=O)c2c(cccc2)C1=O)/C(O)=O</chem>                                             |
| 568 | SBEH-18           | <chem>Oc1ccccc1C=O</chem>                                                                               |
| 569 | R-NPG-27.cdx      | <chem>Oc1ccccc1\C=C(\N1C(=O)c2c(cccc2)C1=O)/C(O)=O</chem>                                               |
| 570 | Remdesivir        | <chem>P(Oc1ccccc1)(OC10C(C#N)(C(O)C10)c1n2N=CN=C(N)c2cc1)(=O)NC(C(OC(CC)CC)=O)C</chem>                  |
| 571 | R-NPG-9.cdx       | <chem>S(C)c1ccc(cc1)\C=C(\N1C(=O)c2c(cccc2)C1=O)/C(O)=O</chem>                                          |
| 572 | N14.mol           | <chem>S1(=O)N=C(Nc2c1cccc2)c1cccc1</chem>                                                               |
| 573 | N16.mol           | <chem>S1(=O)N=C(Nc2c1cccc2)c1ncccc1</chem>                                                              |
| 574 | N17.mol           | <chem>S1(=O)N=C(Nc2cc(ccc12)C(F)(F)F)c1cccc1</chem>                                                     |
| 575 | R-NPG-24.cdx      | <chem>S1C(CCC1\C=C(\N1C(=O)c2c(cccc2)C1=O)/C(O)=O)C</chem>                                              |
| 576 | RXN-6.cdx         | <chem>S1CC(=Nn2c1nn2-c1ccc(OC)cc1)c1c2c(ccc1)cccc2</chem>                                               |
| 577 | RXN-3.cdx         | <chem>S1CC(=Nn2c1nn2-c1ccc(OC)cc1)c1ccc(F)cc1</chem>                                                    |
| 578 | RXN-1.cdx         | <chem>S1CC(=Nn2c1nn2-c1ccc(OC)cc1)c1ccc(OC)cc1</chem>                                                   |
| 579 | RXN-7.cdx         | <chem>S1CC(=Nn2c1nn2-c1ccc(OC)cc1)c1ccc([N+](=O)[O-])cc1</chem>                                         |
| 580 | RXN-5.cdx         | <chem>S1CC(=Nn2c1nn2-c1ccc(OC)cc1)c1ccc(cc1)-c1cccc1</chem>                                             |
| 581 | RXN-4.cdx         | <chem>S1CC(=Nn2c1nn2-c1ccc(OC)cc1)c1ccc(cc1)C</chem>                                                    |
| 582 | N-6.cdx           | <chem>S1CC(=Nn2c1nn2-c1ccccc1)c1c2c(ccc1)cccc2</chem>                                                   |
| 583 | N-3.cdx           | <chem>S1CC(=Nn2c1nn2-c1ccccc1)c1ccc(F)cc1</chem>                                                        |
| 584 | N-1.cdx           | <chem>S1CC(=Nn2c1nn2-c1ccccc1)c1ccc(OC)cc1</chem>                                                       |
| 585 | N-7.cdx           | <chem>S1CC(=Nn2c1nn2-c1ccccc1)c1ccc([N+](=O)[O-])cc1</chem>                                             |
| 586 | N-5.cdx           | <chem>S1CC(=Nn2c1nn2-c1ccccc1)c1ccc(cc1)-c1cccc1</chem>                                                 |
| 587 | N-4.cdx           | <chem>S1CC(=Nn2c1nn2-c1ccccc1)c1ccc(cc1)C</chem>                                                        |
| 588 | I-6.cdx           | <chem>S1CC(=Nn2c1nn2-c1ccccc1)c1c2c(ccc1)cccc2</chem>                                                   |
| 589 | I-3.cdx           | <chem>S1CC(=Nn2c1nn2-c1ccccc1)c1cc(F)ccc1</chem>                                                        |
| 590 | I-1.cdx           | <chem>S1CC(=Nn2c1nn2-c1ccccc1)c1cc(OC)ccc1</chem>                                                       |
| 591 | I-7.cdx           | <chem>S1CC(=Nn2c1nn2-c1ccccc1)c1cc([N+](=O)[O-])ccc1</chem>                                             |
| 592 | I-5.cdx           | <chem>S1CC(=Nn2c1nn2-c1ccccc1)c1ccc(cc1)-c1cccc1</chem>                                                 |
| 593 | I-4.cdx           | <chem>S1CC(=Nn2c1nn2-c1ccccc1)c1ccc(cc1)C</chem>                                                        |
| 594 | F-6.cdx           | <chem>S1CC(=Nn2c1nn2-c1ccccc1)c1c2c(ccc1)cccc2</chem>                                                   |
| 595 | F-3.cdx           | <chem>S1CC(=Nn2c1nn2-c1ccccc1)c1ccc(F)cc1</chem>                                                        |
| 596 | F-1.cdx           | <chem>S1CC(=Nn2c1nn2-c1ccccc1)c1ccc(OC)cc1</chem>                                                       |
| 597 | F-7.cdx           | <chem>S1CC(=Nn2c1nn2-c1ccccc1)c1ccc([N+](=O)[O-])cc1</chem>                                             |
| 598 | F-5.cdx           | <chem>S1CC(=Nn2c1nn2-c1ccccc1)c1ccc(cc1)-c1cccc1</chem>                                                 |
| 599 | F-4.cdx           | <chem>S1CC(=Nn2c1nn2-c1ccccc1)c1ccc(cc1)C</chem>                                                        |
| 600 | N13.mol           | <chem>S1N=C(Nc2c1cccc2)c1cccc1</chem>                                                                   |
| 601 | N15.mol           | <chem>S1N=C(Nc2c1cccc2)c1ncccc1</chem>                                                                  |
| 602 | RXN-14.cdx        | <chem>S1c2n(N=C1C0c1ccc(F)cc1)c(nn2)-c1ccc(OC)cc1</chem>                                                |
| 603 | NP-6.cdx          | <chem>S1c2n(N=C1C0c1ccc(F)cc1)c(nn2)-c1ccccc1</chem>                                                    |
| 604 | TP-6.cdx          | <chem>S1c2n(N=C1C0c1ccc(F)cc1)c(nn2)-c1ccccc1</chem>                                                    |
| 605 | FP-6.cdx          | <chem>S1c2n(N=C1C0c1ccc(F)cc1)c(nn2)-c1ccccc1</chem>                                                    |
| 606 | RXN-10.cdx        | <chem>S1c2n(N=C1C0c1ccc(O)cc1)c(nn2)-c1ccc(OC)cc1</chem>                                                |
| 607 | NP-2.cdx          | <chem>S1c2n(N=C1C0c1ccc(O)cc1)c(nn2)-c1ccccc1</chem>                                                    |
| 608 | TP-2.cdx          | <chem>S1c2n(N=C1C0c1ccc(O)cc1)c(nn2)-c1ccccc1</chem>                                                    |
| 609 | FP-2.cdx          | <chem>S1c2n(N=C1C0c1ccc(O)cc1)c(nn2)-c1ccccc1</chem>                                                    |
| 610 | RXN-13.cdx        | <chem>S1c2n(N=C1C0c1ccc(OC)cc1)c(nn2)-c1ccc(OC)cc1</chem>                                               |

|     | mol        | SMILES                                                                                                       |
|-----|------------|--------------------------------------------------------------------------------------------------------------|
| 611 | NP-5.cdx   | <chem>S1c2n(N=C1C0c1ccc(OC)cc1)c(nn2)-c1ccnc1</chem>                                                         |
| 612 | TP-5.cdx   | <chem>S1c2n(N=C1C0c1ccc(OC)cc1)c(nn2)-c1ccncc1</chem>                                                        |
| 613 | FP-5.cdx   | <chem>S1c2n(N=C1C0c1ccc(OC)cc1)c(nn2)-c1occc1</chem>                                                         |
| 614 | RXN-12.cdx | <chem>S1c2n(N=C1C0c1ccc(cc1)C)c(nn2)-c1ccc(OC)cc1</chem>                                                     |
| 615 | NP-4.cdx   | <chem>S1c2n(N=C1C0c1ccc(cc1)C)c(nn2)-c1ccnc1</chem>                                                          |
| 616 | FP-4.cdx   | <chem>S1c2n(N=C1C0c1ccc(cc1)C)c(nn2)-c1occc1</chem>                                                          |
| 617 | RXN-11.cdx | <chem>S1c2n(N=C1C0c1ccccc1C)c(nn2)-c1ccc(OC)cc1</chem>                                                       |
| 618 | NP-3.cdx   | <chem>S1c2n(N=C1C0c1ccccc1C)c(nn2)-c1ccnc1</chem>                                                            |
| 619 | TP-3.cdx   | <chem>S1c2n(N=C1C0c1ccccc1C)c(nn2)-c1ccncc1</chem>                                                           |
| 620 | FP-3.cdx   | <chem>S1c2n(N=C1C0c1ccccc1C)c(nn2)-c1occc1</chem>                                                            |
| 621 | RXN-9.cdx  | <chem>S1c2n(N=C1C0c1ccccc1O)c(nn2)-c1ccc(OC)cc1</chem>                                                       |
| 622 | NP-1.cdx   | <chem>S1c2n(N=C1C0c1ccccc1O)c(nn2)-c1ccnc1</chem>                                                            |
| 623 | TP-1.cdx   | <chem>S1c2n(N=C1C0c1ccccc1O)c(nn2)-c1ccncc1</chem>                                                           |
| 624 | FP-1.cdx   | <chem>S1c2n(N=C1C0c1ccccc1O)c(nn2)-c1occc1</chem>                                                            |
| 625 | NT-8.cdx   | <chem>S1c2n(N=C1Cc1ccc(F)cc1)c(nn2)-c1ccnc1</chem>                                                           |
| 626 | FT-6.cdx   | <chem>S1c2n(N=C1Cc1ccc(F)cc1)c(nn2)-c1occc1</chem>                                                           |
| 627 | NT-9.cdx   | <chem>S1c2n(N=C1Cc1ccc(OC)cc1)c(nn2)-c1ccnc1</chem>                                                          |
| 628 | TT-7.cdx   | <chem>S1c2n(N=C1Cc1ccc(OC)cc1)c(nn2)-c1ccncc1</chem>                                                         |
| 629 | FT-9.cdx   | <chem>S1c2n(N=C1Cc1ccc(OC)cc1)c(nn2)-c1occc1</chem>                                                          |
| 630 | NT-8.cdx   | <chem>S1c2n(N=C1c1[nH]ccc1)c(nn2)-c1ccnc1</chem>                                                             |
| 631 | TT-8.cdx   | <chem>S1c2n(N=C1c1[nH]ccc1)c(nn2)-c1ccncc1</chem>                                                            |
| 632 | FT-7.cdx   | <chem>S1c2n(N=C1c1[nH]ccc1)c(nn2)-c1occc1</chem>                                                             |
| 633 | NT-3.cdx   | <chem>S1c2n(N=C1c1ccoc1)c(nn2)-c1ccnc1</chem>                                                                |
| 634 | TT-4.cdx   | <chem>S1c2n(N=C1c1ccoc1)c(nn2)-c1ccncc1</chem>                                                               |
| 635 | FT-3.cdx   | <chem>S1c2n(N=C1c1ccoc1)c(nn2)-c1occc1</chem>                                                                |
| 636 | NT-5.cdx   | <chem>S1c2n(N=C1c1ccoc1C)c(nn2)-c1ccnc1</chem>                                                               |
| 637 | TT-5.cdx   | <chem>S1c2n(N=C1c1ccoc1C)c(nn2)-c1ccncc1</chem>                                                              |
| 638 | FT-5.cdx   | <chem>S1c2n(N=C1c1ccoc1C)c(nn2)-c1occc1</chem>                                                               |
| 639 | NT-4.cdx   | <chem>S1c2n(N=C1c1occc1)c(nn2)-c1ccnc1</chem>                                                                |
| 640 | TT-3.cdx   | <chem>S1c2n(N=C1c1occc1)c(nn2)-c1ccncc1</chem>                                                               |
| 641 | FT-4.cdx   | <chem>S1c2n(N=C1c1occc1)c(nn2)-c1occc1</chem>                                                                |
| 642 | MI-79.mol  | <chem>S=C(NC(=O)c1ccccc1)N\N=C(/C)\c1c2OC(=O)C=Cc2ccc1O</chem>                                               |
| 643 | MI-59.mol  | <chem>S=C(NC(=O)c1ccccc1)N\N=C(/C)\c1cc2CCOc2cc1</chem>                                                      |
| 644 | MI-219     | <chem>S=C(NC(=O)c1ccccc1)N\N=C\c1ccc([N+](=O)[O-])cc1</chem>                                                 |
| 645 | MI-70.mol  | <chem>S=C(NC1CCCC1)N\N=C(/C)\c1c2OC(=O)C=Cc2ccc1O</chem>                                                     |
| 646 | MI-50.mol  | <chem>S=C(NC1CCCC1)N\N=C(/C)\c1cc2CCOc2cc1</chem>                                                            |
| 647 | MI-30.mol  | <chem>S=C(NC1CCCC1)N\N=C(/C)\c1cc2c(cc1)cccc2</chem>                                                         |
| 648 | MI-110.mol | <chem>S=C(NC1CCCC1)N\N=C(/C)\c1nccnc1C</chem>                                                                |
| 649 | MI-190.mol | <chem>S=C(NC1CCCC1)N\N=C\1/CCc2cc(OC)c(OC)cc/12</chem>                                                       |
| 650 | MI-210.mol | <chem>S=C(NC1CCCC1)N\N=C\c1ccc([N+](=O)[O-])cc1</chem>                                                       |
| 651 | MI-37.mol  | <chem>S=C(NCC)N\N=C(/C)\c1cc2c(cc1)cccc2</chem>                                                              |
| 652 | MI-117.mol | <chem>S=C(NCC)N\N=C(/C)\c1nccnc1C</chem>                                                                     |
| 653 | MI-217     | <chem>S=C(NCC)N\N=C\c1ccc([N+](=O)[O-])cc1</chem>                                                            |
| 654 | MI-21.mol  | <chem>S=C(NCCN1CCOCC1)N\N=C(/C)\c1cc2c(cc1)cccc2</chem>                                                      |
| 655 | MI-34.mol  | <chem>S=C(NCCc1ccccc1)N\N=C(/C)\c1cc2c(cc1)cccc2</chem>                                                      |
| 656 | MI-64.mol  | <chem>S=C(N\N=C(/C)\c1c2OC(=O)C=Cc2ccc1O)N</chem>                                                            |
| 657 | MI-44.mol  | <chem>S=C(N\N=C(/C)\c1cc2CCOc2cc1)N</chem>                                                                   |
| 658 | MI-24.mol  | <chem>S=C(N\N=C(/C)\c1cc2c(cc1)cccc2)N</chem>                                                                |
| 659 | MI-104.mol | <chem>S=C(N\N=C(/C)\c1nccnc1C)N</chem>                                                                       |
| 660 | S23        | <chem>S=C(N\N=C\1/CC[C@@]12[C@H](C3[C@H](CCC2[C@H]1/C(OCc1ccccc1)=O)C)(C)[C@@]1(CC[C@H]2[C@H]1C1=CC3=</chem> |
| 661 | MI-184.mol | <chem>S=C(N\N=C\1/CCc2cc(OC)c(OC)cc/12)N</chem>                                                              |
| 662 | MI-204.mol | <chem>S=C(N\N=C\c1ccc([N+](=O)[O-])cc1)N</chem>                                                              |
| 663 | MI-214.mol | <chem>S=C(Nc1c(ccccc1C)C)N\N=C\c1ccc([N+](=O)[O-])cc1</chem>                                                 |
| 664 | MI-66.mol  | <chem>S=C(Nc1c2c(ccc1)cccc2)N\N=C(/C)\c1c2OC(=O)C=Cc2ccc1O</chem>                                            |
| 665 | MI-46.mol  | <chem>S=C(Nc1c2c(ccc1)cccc2)N\N=C(/C)\c1cc2CCOc2cc1</chem>                                                   |
| 666 | MI-26.mol  | <chem>S=C(Nc1c2c(ccc1)cccc2)N\N=C(/C)\c1cc2c(cc1)cccc2</chem>                                                |
| 667 | MI-106.mol | <chem>S=C(Nc1c2c(ccc1)cccc2)N\N=C(/C)\c1nccnc1C</chem>                                                       |
| 668 | MI-186.mol | <chem>S=C(Nc1c2c(ccc1)cccc2)N\N=C\1/CCc2cc(OC)c(OC)cc/12</chem>                                              |
| 669 | MI-206.mol | <chem>S=C(Nc1c2c(ccc1)cccc2)N\N=C\c1ccc([N+](=O)[O-])cc1</chem>                                              |
| 670 | MI-35.mol  | <chem>S=C(Nc1cc(F)ccc1)N\N=C(/C)\c1cc2c(cc1)cccc2</chem>                                                     |
| 671 | MI-65.mol  | <chem>S=C(Nc1cc(OC)ccc1)N\N=C(/C)\c1c2OC(=O)C=Cc2ccc1O</chem>                                                |

|     | mol        | SMILES                                                                                                     |
|-----|------------|------------------------------------------------------------------------------------------------------------|
| 672 | MI-45.mol  | <chem>S=C(Nc1cc(OC)ccc1)N\N=C(/C)\c1cc2CC0c2cc1</chem>                                                     |
| 673 | MI-25.mol  | <chem>S=C(Nc1cc(OC)ccc1)N\N=C(/C)\c1cc2c(cc1)cccc2</chem>                                                  |
| 674 | MI-216.mol | <chem>S=C(Nc1cc(cc(c1)C(F)(F)F)C(F)(F)F)N\N=C\c1ccc([N+](=O)[O-])cc1</chem>                                |
| 675 | MI-73.mol  | <chem>S=C(Nc1ccc(F)cc1)N\N=C(/C)\c1c20C(=O)C=Cc2ccc10</chem>                                               |
| 676 | MI-53.mol  | <chem>S=C(Nc1ccc(F)cc1)N\N=C(/C)\c1cc2CC0c2cc1</chem>                                                      |
| 677 | MI-113.mol | <chem>S=C(Nc1ccc(F)cc1)N\N=C(/C)\c1nccnc1C</chem>                                                          |
| 678 | MI-193.mol | <chem>S=C(Nc1ccc(F)cc1)N\N=C\1/CCc2cc(OC)c(OC)cc/12</chem>                                                 |
| 679 | MI-213.mol | <chem>S=C(Nc1ccc(F)cc1)N\N=C\c1ccc([N+](=O)[O-])cc1</chem>                                                 |
| 680 | MI-23.mol  | <chem>S=C(Nc1ccc([N+](=O)[O-])cc1)N\N=C(/C)\c1cc2c(cc1)cccc2</chem>                                        |
| 681 | MI-103.mol | <chem>S=C(Nc1ccc([N+](=O)[O-])cc1)N\N=C(/C)\c1nccnc1C</chem>                                               |
| 682 | MI-203.mol | <chem>S=C(Nc1ccc([N+](=O)[O-])cc1)N\N=C\c1ccc([N+](=O)[O-])cc1</chem>                                      |
| 683 | MI-28.mol  | <chem>S=C(Nc1ccc(cc1)C)N\N=C(/C)\c1cc2c(cc1)cccc2</chem>                                                   |
| 684 | MI-120.mol | <chem>S=C(Nc1ccc(cc1)CC)N\N=C(/C)\c1nccnc1C</chem>                                                         |
| 685 | MI-200.mol | <chem>S=C(Nc1ccc(cc1)CC)N\N=C\1/CCc2cc(OC)c(OC)cc/12</chem>                                                |
| 686 | MI-220.cdx | <chem>S=C(Nc1ccc(cc1)CC)N\N=C\c1ccc([N+](=O)[O-])cc1</chem>                                                |
| 687 | MI-72.mol  | <chem>S=C(Nc1ccccc1)N\N=C(/C)\c1c20C(=O)C=Cc2ccc10</chem>                                                  |
| 688 | MI-52.mol  | <chem>S=C(Nc1ccccc1)N\N=C(/C)\c1cc2CC0c2cc1</chem>                                                         |
| 689 | MI-32.mol  | <chem>S=C(Nc1ccccc1)N\N=C(/C)\c1cc2c(cc1)cccc2</chem>                                                      |
| 690 | MI-112.mol | <chem>S=C(Nc1ccccc1)N\N=C(/C)\c1nccnc1C</chem>                                                             |
| 691 | MI-192.mol | <chem>S=C(Nc1ccccc1)N\N=C\1/CCc2cc(OC)c(OC)cc/12</chem>                                                    |
| 692 | MI-212.mol | <chem>S=C(Nc1ccccc1)N\N=C\c1ccc([N+](=O)[O-])cc1</chem>                                                    |
| 693 | MI-78.mol  | <chem>S=C(Nc1ccccc1C)N\N=C(/C)\c1c20C(=O)C=Cc2ccc10</chem>                                                 |
| 694 | MI-58.mol  | <chem>S=C(Nc1ccccc1C)N\N=C(/C)\c1cc2CC0c2cc1</chem>                                                        |
| 695 | MI-27.mol  | <chem>S=C(Nc1ccccc1F)N\N=C(/C)\c1cc2c(cc1)cccc2</chem>                                                     |
| 696 | TRN.cdx    | <chem>S=C1NN=C(N1N)c1ccnc1</chem>                                                                          |
| 697 | TRI.cdx    | <chem>S=C1NN=C(N1N)c1cncc1</chem>                                                                          |
| 698 | N4.mol     | <chem>S=C=NCC(N1CCc2c([C@H]1)[C@H]10Cc3c1ccc(OC)c3OC)c(OC)c10C0c1c2)c1cc2Cc3c(-c2cc1)cccc3</chem>          |
| 699 | N1.mol     | <chem>S=C=NCC(N1CCc2c([C@H]1)[C@H]10Cc3c1ccc(OC)c3OC)c(OC)c10C0c1c2)c1ccc(F)cc1</chem>                     |
| 700 | N2.mol     | <chem>S=C=NCC(N1CCc2c([C@H]1)[C@H]10Cc3c1ccc(OC)c3OC)c(OC)c10C0c1c2)c1ccc(F)cc1</chem>                     |
| 701 | N5.mol     | <chem>S=C=NCC(N1CCc2c([C@H]1)[C@H]10Cc3c1ccc(OC)c3OC)c(OC)c10C0c1c2)c1ccc(cc1)C</chem>                     |
| 702 | N3.mol     | <chem>S=C=NCC(N1CCc2c([C@H]1)[C@H]10Cc3c1ccc(OC)c3OC)c(OC)c10C0c1c2)c1ccnc1</chem>                         |
| 703 | N8.mol     | <chem>S=C=NCCCC(C)[C@H]1CC[C@H]2[C@H]1[C@H]3[C@H]1[C@H]4[C@H]1(C[C@H]1(O)CC4)CC3)C[C@H]2O)CC1</chem>       |
| 704 | N6.mol     | <chem>S=C=NCCCC(C)[C@H]1CC[C@H]2[C@H]1[C@H]3[C@H]1(C[C@H]1(O)[C@]12C)[C@H]1([C@H]1(O)CC1)C[C@H]3</chem>    |
| 705 | N10.mol    | <chem>S=C=NCCC[C@H]1(C)[C@H]1CC[C@H]2[C@H]1[C@H]3[C@H]1(CC[C@]12C)[C@H]1(C(C[C@H]1(O)CC1)C[C@H]3O)C</chem> |
| 706 | N9.mol     | <chem>S=C=NCCC[C@H]1(C)[C@H]1CC[C@H]2[C@H]1[C@H]3[C@H]1(CC[C@]12C)[C@H]1(C(C[C@H]1(O)CC1)C[C@H]3O)C</chem> |
| 707 | N7.mol     | <chem>S=C=NCCC[C@H]1(C)[C@H]1C2CC[C@]3(C)[C@]4(CC[C@H]1(O)[C@]4(C=C[C@H]3(C)[C@H]2(CC1)C)C)C</chem>        |
| 708 | TS-108.cdx | <chem>S\1C=C(N(/C/1=N/N=C(C)C)C12CC3CC(C1)CC(C2)C3)c1c2c(ccc1)cccc2)c1cccc1</chem>                         |
| 709 | TS-106.cdx | <chem>S\1C=C(N(/C/1=N/N=C(C)C)C12CC3CC(C1)CC(C2)C3)c1c2c(ccc1)cccc2)c1cccc1</chem>                         |
| 710 | TS-105.cdx | <chem>S\1C=C(N(/C/1=N/N=C(C)C)C12CC3CC(C1)CC(C2)C3)c1cccc1)c1cccc1</chem>                                  |
| 711 | TS-107.cdx | <chem>S\1C=C(N(/C/1=N/N=C(C)C)C12CC3CC(C1)CC(C2)C3)c1cccc1C)c1cccc1</chem>                                 |
| 712 | TS-103.cdx | <chem>S\1C=C(N(/C/1=N/N=C(\C)/c1cc2NC(=O)C0c2cc1)c1c(cccc1C)C)c1cccc1</chem>                               |
| 713 | TS-102.cdx | <chem>S\1C=C(N(/C/1=N/N=C(\C)/c1cc2NC(=O)C0c2cc1)c1cc(OC)ccc1)c1cccc1</chem>                               |
| 714 | TS-101.cdx | <chem>S\1C=C(N(/C/1=N/N=C(\C)/c1cc2NC(=O)C0c2cc1)c1cccc1)c1cccc1</chem>                                    |
| 715 | TS-104.cdx | <chem>S\1C=C(N(/C/1=N/N=C(\C)/c1cc2NC(=O)C0c2cc1)c1cccc1C)c1cccc1</chem>                                   |
| 716 | TS-112.cdx | <chem>S\1C=C(N(/C/1=N/N=C(\C)/c1cc20CC0c2cc1)c1c(cccc1C)C)c1cccc1</chem>                                   |
| 717 | TS-110.cdx | <chem>S\1C=C(N(/C/1=N/N=C(\C)/c1cc20CC0c2cc1)c1c2c(ccc1)cccc2)c1cccc1</chem>                               |
| 718 | TS-115.cdx | <chem>S\1C=C(N(/C/1=N/N=C/c1c2c([nH]c1)cccc2)C1CCCC1)c1cccc1</chem>                                        |
| 719 | TS-116.cdx | <chem>S\1C=C(N(/C/1=N/N=C/c1c2c([nH]c1)cccc2)c1c(cccc1C)C)c1cccc1</chem>                                   |
| 720 | TS-113.cdx | <chem>S\1C=C(N(/C/1=N/N=C/c1c2c([nH]c1)cccc2)c1cccc1)c1cccc1</chem>                                        |
| 721 | TS-111.cdx | <chem>S\1C=C(N(Cc2cccc2)/C/1=N/N=C(\C)/c1cc20CC0c2cc1)c1cccc1</chem>                                       |
| 722 | TS-114.cdx | <chem>S\1C=C(N(Cc2cccc2)/C/1=N/N=C/c1c2c([nH]c1)cccc2)c1cccc1</chem>                                       |
| 723 | M-2.cdx    | <chem>Sc1oc(nn1)-c1[nH]c2c(c1)cccc2</chem>                                                                 |
| 724 | M-1.cdx    | <chem>Sc1oc(nn1)-c1cc(OC)c(OC)c(OC)c1</chem>                                                               |
| 725 | M-15.cdx   | <chem>Sc1oc(nn1)CCc1cc(OC)ccc1</chem>                                                                      |
| 726 | M-7.cdx    | <chem>Sc1oc(nn1)CCc1ccc(OC)cc1</chem>                                                                      |
| 727 | M-9.cdx    | <chem>Sc1oc(nn1)CCc1cccc10C</chem>                                                                         |
| 728 | M-14.cdx   | <chem>Sc1oc(nn1)Cc1cc(OC)ccc1</chem>                                                                       |
| 729 | M-12.cdx   | <chem>Sc1oc(nn1)Cc1ccc(OC)cc1</chem>                                                                       |
| 730 | M-4.cdx    | <chem>Sc1oc(nn1)Cc1ccc(cc1)C</chem>                                                                        |
| 731 | M-6.cdx    | <chem>Sc1oc(nn1)Cc1cccc1F</chem>                                                                           |
| 732 | M-13.cdx   | <chem>Sc1oc(nn1)Cc1cccc10C</chem>                                                                          |

|     | mol             | SMILES                                                                                        |
|-----|-----------------|-----------------------------------------------------------------------------------------------|
| 733 | Safavi-R32.mol  | [Si](OC)(OC)(OC)CCCOC1OC1                                                                     |
| 734 | Safavi-R31.mol  | [Si](OC)(OC)(OC)CCCOC1OC1                                                                     |
| 735 | N-2             | [Si](OCc1c(OC)c(OC)ccc1C(O)C1N(CCc2c1c(OC)c1OC0c1c2)C)(C(C)(C)C)(C)C                          |
| 736 | N-D-12c         | [Si](OCc1c(OC)c(OC)ccc1C(O)C1N(CCc2c1c(OC)c1OC0c1c2)CC(c1ccc(F)cc1)c1ccc(F)cc1)(C(C)(C)C)(C)C |
| 737 | N-D-11c         | [Si](OCc1c(OC)c(OC)ccc1C(O)C1N(CCc2c1c(OC)c1OC0c1c2)CC1CC1)(C(C)(C)C)(C)C                     |
| 738 | N-D-15c         | [Si](OCc1c(OC)c(OC)ccc1C(O)C1N(CCc2c1c(OC)c1OC0c1c2)CC0c1cccc1)(C(C)(C)C)(C)C                 |
| 739 | N-D-18c         | [Si](OCc1c(OC)c(OC)ccc1C(O)C1N(CCc2c1c(OC)c1OC0c1c2)Cc1c2OC0c2ccc1)(C(C)(C)C)(C)C             |
| 740 | N-D-11c         | [Si](OCc1c(OC)c(OC)ccc1C(O)C1N(CCc2c1c(OC)c1OC0c1c2)Cc1c2c(cc3c1cccc3)cccc2)(C(C)(C)C)(C)C    |
| 741 | N-D-2c          | [Si](OCc1c(OC)c(OC)ccc1C(O)C1N(CCc2c1c(OC)c1OC0c1c2)Cc1cccc1)(C(C)(C)C)(C)C                   |
| 742 | S67             | [Si](O[C@H]1C[C@]12([C@H](CC[C@]3(C2C(=O)C=C2[C@H]4[C@H](C)[C@H](CC[C@]4(CC[C@]23C)C          |
| 743 | SK-10           | c12c(c3c(c4CC[C@]5(C(c4cc3)[C@H](C)[C@H](CC5)C)C)cc1)cccc2C                                   |
| 744 | SK-12           | c12c(c3c(c4c(c5cc(ccc5cc4)C)cc3)cc1)cccc2C                                                    |
| 745 | N12.mol         | n1cccc1/C(=N/c1cccc1CCC)/N                                                                    |
| 746 | 1.cdx           | o1c2nc3c(CCC(=O)C3(OC)C\C=C(\C)/C)c(OC)c2cc1                                                  |
| 747 | 12.cdx          | o1c2nc3c(ccc(O)c3C\C=C(\C)/C)c(OC)c2cc1                                                       |
| 748 | 9.cdx           | o1c2nc3c(ccc(OC(O)C(O)(C)C)c3OC)c(OC)c2cc1                                                    |
| 749 | 7.cdx           | o1c2nc3c(cccc3OC)c(OC)c2cc1                                                                   |
| 750 | MI-124.mol      | s1c(/C(=N/NC(=S)N)/C)c(nc1C)C                                                                 |
| 751 | MI-130.mol      | s1c(/C(=N/NC(=S)NC2CCCC2)/C)c(nc1C)C                                                          |
| 752 | MI-137.mol      | s1c(/C(=N/NC(=S)NCC)/C)c(nc1C)C                                                               |
| 753 | MI-126.mol      | s1c(/C(=N/NC(=S)Nc2c3c(ccc2)cccc3)/C)c(nc1C)C                                                 |
| 754 | MI-133.mol      | s1c(/C(=N/NC(=S)Nc2ccc(F)cc2)/C)c(nc1C)C                                                      |
| 755 | MI-123.mol      | s1c(/C(=N/NC(=S)Nc2ccc([N+](=O)[O-])cc2)/C)c(nc1C)C                                           |
| 756 | MI-140.mol      | s1c(/C(=N/NC(=S)Nc2ccc(cc2)CC)/C)c(nc1C)C                                                     |
| 757 | MI-132.mol      | s1c(/C(=N/NC(=S)Nc2cccc2)/C)c(nc1C)C                                                          |
| 758 | MI-150.mol      | s1c(C)c(cc1C)/C(=N/NC(=S)NC1CCCC1)/C                                                          |
| 759 | MI-157.mol      | s1c(C)c(cc1C)/C(=N/NC(=S)NCC)/C                                                               |
| 760 | MI-153.mol      | s1c(C)c(cc1C)/C(=N/NC(=S)Nc1ccc(F)cc1)/C                                                      |
| 761 | MI-143.mol      | s1c(C)c(cc1C)/C(=N/NC(=S)Nc1ccc([N+](=O)[O-])cc1)/C                                           |
| 762 | MI-160.mol      | s1c(C)c(cc1C)/C(=N/NC(=S)Nc1ccc(cc1)CC)/C                                                     |
| 763 | MI-152.mol      | s1c(C)c(cc1C)/C(=N/NC(=S)Nc1cccc1)/C                                                          |
| 764 | 32.cdx          | s1c(ccc1C=O)-c1c2c(sc1C(OCCCC)=O)c1sc(C(OCCCC)=O)c(c1cc2)-c1sc(cc1)C=O                        |
| 765 | 7.cdx           | s1c2c(-c3c(NC2=O)cccc3)c2c1c1sc3c(-c4c(NC3=O)cccc4)c1cc2                                      |
| 766 | 31.cdx          | s1c2c(ccc3c2sc(C(OCCCC)=O)c3-c2c(F)c(C)F)c(F)c2F)c(-c2c(F)c(F)c(F)c(F)c2F)c1C(OCCCC)=O        |
| 767 | 16.cdx          | s1c2c(ccc3c2sc(C(OCCCC)=O)c3-c2c(F)ccc2F)c(-c2c(F)ccc2F)c1C(OCCCC)=O                          |
| 768 | 14.cdx          | s1c2c(ccc3c2sc(C(OCCCC)=O)c3-c2c(cccc2F)C(F)(F)F)c(-c2c(cccc2F)C(F)(F)F)c1C(OCCCC)=O          |
| 769 | 15.cdx          | s1c2c(ccc3c2sc(C(OCCCC)=O)c3-c2cc(F)ccc2F)c(-c2cc(F)ccc2F)c1C(OCCCC)=O                        |
| 770 | 12.cdx          | s1c2c(ccc3c2sc(C(OCCCC)=O)c3-c2cc3c(cc2)cccc3)c(-c2cc3c(cc2)cccc3)c1C(OCCCC)=O                |
| 771 | 23.cdx          | s1c2c(ccc3c2sc(C(OCCCC)=O)c3-c2ccc(F)cc2)c(-c2ccc(F)cc2)c1C(OCCCC)=O                          |
| 772 | 20.cdx          | s1c2c(ccc3c2sc(C(OCCCC)=O)c3-c2ccc(OC)cc2)c(-c2ccc(OC)cc2)c1C(OCCCC)=O                        |
| 773 | 21.cdx          | s1c2c(ccc3c2sc(C(OCCCC)=O)c3-c2ccc([N+](=O)[O-])cc2)c(-c2ccc([N+](=O)[O-])cc2)c1C(OCCCC)=O    |
| 774 | 22.cdx          | s1c2c(ccc3c2sc(C(OCCCC)=O)c3-c2ccc(cc2)C)c(-c2ccc(cc2)C)c1C(OCCCC)=O                          |
| 775 | 27.cdx          | s1c2c(ccc3c2sc(C(OCCCC)=O)c3-c2ccc(cc2)C=O)c(-c2ccc(cc2)C=O)c1C(OCCCC)=O                      |
| 776 | 24.cdx          | s1c2c(ccc3c2sc(C(OCCCC)=O)c3-c2cccc(C(F)(F)F)c2F)c(-c2cccc(C(F)(F)F)c2F)c1C(OCCCC)=O          |
| 777 | 11.cdx          | s1c2c(ccc3c2sc(C(OCCCC)=O)c3-c2cccc2)c(-c2cccc2)c1C(OCCCC)=O                                  |
| 778 | 30.cdx          | s1c2c(ccc3c2sc(C(OCCCC)=O)c3-c2cccc2C#N)c(-c2cccc2C#N)c1C(OCCCC)=O                            |
| 779 | 29.cdx          | s1c2c(ccc3c2sc(C(OCCCC)=O)c3-c2cccc2C(=O)C)c(-c2cccc2C(=O)C)c1C(OCCCC)=O                      |
| 780 | 13.cdx          | s1c2c(ccc3c2sc(C(OCCCC)=O)c3-c2cccc2C(F)(F)F)c(-c2cccc2C(F)(F)F)c1C(OCCCC)=O                  |
| 781 | 6.cdx           | s1c2c(ccc3c2sc(C(OCCCC)=O)c3-c2cccc2N)c(-c2cccc2N)c1C(OCCCC)=O                                |
| 782 | 4.cdx           | s1c2c(ccc3c2sc(C(OCCCC)=O)c3-c2cccc2O)c(-c2cccc2O)c1C(OCCCC)=O                                |
| 783 | 5.cdx           | s1c2c(ccc3c2sc(C(OCCCC)=O)c3-c2cccc2O)c(-c2cccc2O)c1C(OCCCC)=O                                |
| 784 | 18.cdx          | s1c2c(ccc3c2sc(C(OCCCC)=O)c3-c2cccc2O)c(-c2cccc2O)c1C(OCCCC)=O                                |
| 785 | 19.cdx          | s1c2c(ccc3c2sc(C(OCCCC)=O)c3-c2cccc2OC)c(-c2cccc2OC)c1C(OCCCC)=O                              |
| 786 | 33.cdx          | s1c2c(ccc3c2sc(C(OCCCC)=O)c3-c2cccc2OC)c(-c2cccc2OC)c1C(OCCCC)=O                              |
| 787 | 26.cdx          | s1c2c(ccc3c2sc(C(OCCCC)=O)c3-c2oc(cc2)C=O)c(-c2oc(cc2)C=O)c1C(OCCCC)=O                        |
| 788 | IN-3,4-DM-B.cdx | s1c2c(nc1N\N=C/c1cc(OC)ccc1OC)cccc2                                                           |
| 789 | IN-PDMA-B.cdx   | s1c2c(nc1N\N=C/c1ccc(N(C)C)cc1)cccc2                                                          |
| 790 | IN-HB.cdx       | s1c2c(nc1N\N=C/c1ccc(O)cc1)cccc2                                                              |
| 791 | IN-2,4-DH-B.cdx | s1c2c(nc1N\N=C/c1ccc(O)cc1O)cccc2                                                             |
| 792 | IN-PA.cdx       | s1c2c(nc1N\N=C/c1ccc(OC)cc1)cccc2                                                             |
| 793 | IN-NB.cdx       | s1c2c(nc1N\N=C/c1ccc([N+](=O)[O-])cc1)cccc2                                                   |

|     | mol            | SMILES                                                                                                   |
|-----|----------------|----------------------------------------------------------------------------------------------------------|
| 794 | IN-MT.cdx      | <chem>s1c2c(nc1N\N=C/c1ccc(cc1)C(OC)=O)cccc2</chem>                                                      |
| 795 | INB.cdx        | <chem>s1c2c(nc1N\N=C/c1cccc(c1)cccc2</chem>                                                              |
| 796 | IN-OA.cdx      | <chem>s1c2c(nc1N\N=C/c1cccc10C)cccc2</chem>                                                              |
| 797 | IN-P-2CD.cdx   | <chem>s1c2c(nc1N\N=C/c1ncccc1)cccc2</chem>                                                               |
| 798 | INT.cdx        | <chem>s1c2c(nc1N\N=C/c1ccc(cc1)\C=N\nc1sc3c(n1)cccc3)cccc2</chem>                                        |
| 799 | 9.cdx          | <chem>s1c2c3c(-c4ccc(-c5c6c(sc5C(OCCCC)=O)c5sc(c(-c7ccc(-c8c(c2sc8C(OCCCC)=O)cc3)cc7)c5cc6)C(OC</chem>   |
| 800 | 10.cdx         | <chem>s1c2c3c(-c4sc(-c5c6c(sc5C(OCCCC)=O)c5sc(c(-c7sc(-c8c(c2sc8C(OCCCC)=O)cc3)cc7)c5cc6)C(OCCC</chem>   |
| 801 | 28.cdx         | <chem>s1cccc1-c1c2c(sc1C(OCCCC)=O)c1sc(C(OCCCC)=O)c(c1cc2)-c1sccc1</chem>                                |
| 802 | N18.mol        | <chem>s1cccc1C=1Nc2c(SN=1)cccc2</chem>                                                                   |
| 803 | Ritonavir      | <chem>s1cncc1COC(=O)NC(Cc1cccc1)C(O)CC(NC(=O)C(NC(=O)N(Cc1nc(sc1)C(C)C)C(C)C)Cc1cccc1</chem>             |
| 804 | Baicalcin.cdx  | <chem>O1c2c(c(O)c(O)c(O)c2)C(O)C=C1cccc1</chem>                                                          |
| 805 | Boceprevir.cdx | <chem>O=C(N[C@@H]([C@@H](O)C(=O)N)CC1CC1)[C@@H]1N(C[C@@]2(C)[C@]1(C)C2(C)C)C(=O)[C@@H](NC(=O)NC(</chem>  |
| 806 | Carmofur.cdx   | <chem>FC1CN(C(C(=O)NCCCCC)C(=O)NC1=O</chem>                                                              |
| 807 | Disulfiram.cdx | <chem>S(SC(=S)N(CC)CC)C(=S)N(CC)CC</chem>                                                                |
| 808 | Ebselen.cdx    | <chem>[Se]1N(C(=O)c2c1cccc2)c1cccc1</chem>                                                               |
| 809 | GC376.cdx      | <chem>S(O)(=O)(=O)[C@@H](O)[C@@H](NC(=O)[C@@H](NC(Oc1cccc1)=O)CC(C)C)[C@@H]1CCNC1=O</chem>               |
| 810 | Masitinib.cdx  | <chem>s1cc(nc1Nc1cc(NC(=O)c2ccc(cc2)CN2CCN(CC2)C)ccc1C)-c1ccnc1</chem>                                   |
| 811 | N3.cdx         | <chem>o1nc(cc1C)C(=O)N[C@@H](C(=O)N[C@@H](C(C)C)C(=O)N[C@@H](CC(C)C)C(=O)N[C@@H](\C=C\C(OCc1cccc</chem>  |
| 812 | O6K.cdx        | <chem>O=C1N(CC=C1NC(OC(C)(C)C)=O)[C@@H](CC1CC1)C(=O)N[C@@H]([C@@H](O)C(=O)NCC1cccc1)[C@@H]1C</chem>      |
| 813 | px-12.cdx      | <chem>S(SC(CC)C)c1[nH]cnc1</chem>                                                                        |
| 814 | Shikonin.cdx   | <chem>Oc1c2c(C(=O)CC([C@@H](O)\C=C(\C)/C)C2=O)c(O)cc1</chem>                                             |
| 815 | Telaprevir.cdx | <chem>O=C(N[C@@H](C(=O)N[C@@H](C(C)(C)C)C(=O)N1CC2(CCC2)[C@@H]1C(=O)N[C@@H]([C@@H](O)C(=O)NC1CC1)</chem> |
| 816 | Tideglusib.cdx | <chem>S1N(c2c3c(ccc2)ccc3)C(=O)N(Cc2cccc2)C1=O</chem>                                                    |
| 817 | ued.cdx        | <chem>O=C1NCC[C@@H]1C[C@@H](NC(=O)[C@@H](NC(Oc1cccc1)=O)CC(C)C)CO</chem>                                 |
| 818 | X77.cdx        | <chem>O=C(N([C@@H](C(=O)NC1CCCC1)c1ccnc1)c1ccc(cc1)C(C)(C)C)c1nc[nH]c1</chem>                            |
